# Supplementary material for: The Chemosensory Receptor Repertoire of a True Shark Is Dominated by a Single Olfactory Receptor Family
Source: PubMed Central journal article supplement — Genome Biol Evol. 2019 Jan 12;11(2):398–405. doi: 10.1093/gbe/evz002 (PMC6368271; doi:10.1093/gbe/evz002), 2019-01-12
Supplement: evz002_supp.pdf [file evz002_supp.pdf]

**Dataset S1 to S3**

**The chemosensory receptor repertoire of a true shark is dominated by a single olfactory receptor family**

Sharma et al

**Dataset S1. *Scyliorhinus canicula* (Sc) and *Callorhinus milii* (Cm) olfactory and gustatory gene list**



|                                                            |  |          |                                             |       |                        |          |          |   |
|------------------------------------------------------------|--|----------|---------------------------------------------|-------|------------------------|----------|----------|---|
| 18                                                         |  | Cm-V2R28 | SINCAMP00000017718_17887 SINCAMG00000011524 | 763AA | Venkatesh et al (2014) | 387733   | 459291   | - |
| 19                                                         |  | Cm-V2R22 | SINCAMP00000019659_19856 SINCAMG00000012801 | 799AA | Venkatesh et al (2014) | 1067     | 8032     | + |
| 20                                                         |  | Cm-V2R29 | SINCAMP00000020657_20862 SINCAMG00000013446 | 663AA | Venkatesh et al (2014) | 4        | 4947     | - |
| 21                                                         |  | Cm-V2R25 | SINCAMP00000022119_22342 SINCAMG00000014366 | 873AA | Venkatesh et al (2014) | 298      | 6546     | + |
| 22                                                         |  | Cm-V2R13 | SINCAMP00000025021_25275 SINCAMG00000016226 | 837AA | Venkatesh et al (2014) | 8113736  | 8118549  | - |
| 23                                                         |  | Cm-V2R12 | SINCAMP00000025037_25291 SINCAMG00000016227 | 870AA | Venkatesh et al (2014) | 8119835  | 8123927  | - |
| 24                                                         |  | Cm-V2R15 | SINCAMP00000025041_25295 SINCAMG00000016237 | 865AA | Venkatesh et al (2014) | 8131390  | 8137320  | - |
| 25                                                         |  | Cm-V2R17 | SINCAMP00000025043_25297 SINCAMG00000016239 | 843AA | Venkatesh et al (2014) | 8138413  | 8159566  | - |
| 26                                                         |  | Cm-V2R14 | SINCAMP00000025044_25298 SINCAMG00000016241 | 595AA | Venkatesh et al (2014) | 8161476  | 8171864  | - |
| 27                                                         |  | Cm-V2R16 | SINCAMP00000025045_25299 SINCAMG00000016242 | 813AA | Venkatesh et al (2014) | 8177136  | 8182781  | - |
| 28                                                         |  | Cm-V2R18 | SINCAMP00000025049_25303 SINCAMG00000016243 | 864AA | Venkatesh et al (2014) | 8185728  | 8193356  | - |
| 29                                                         |  | Cm-V2R11 | SINCAMP00000025051_25305 SINCAMG00000016247 | 866AA | Venkatesh et al (2014) | 8227770  | 8233299  | - |
| 30                                                         |  | Cm-V2R20 | SINCAMP00000025078_25332 SINCAMG00000016248 | 869AA | Venkatesh et al (2014) | 8237197  | 8241820  | + |
| 31                                                         |  | Cm-V2R1  | SINCAMP00000025728_25987 SINCAMG00000016659 | 858AA | Found in this study    | 17102368 | 17109407 | - |
| 32                                                         |  | Cm-V2R2  | SINCAMP00000025730_25989 SINCAMG00000016660 | 858AA | Venkatesh et al (2014) | 17115848 | 17122751 | - |
| 33                                                         |  | Cm-V2R3  | SINCAMP00000025739_25998 SINCAMG00000016665 | 860AA | Venkatesh et al (2014) | 17238108 | 17242406 | + |
| 34                                                         |  | Cm-V2R9  | SINCAMP00000025740_25999 SINCAMG00000016666 | 840AA | Venkatesh et al (2014) | 17247593 | 17253666 | + |
| <b>Scyliorhinus canicula</b> <b>catshark</b> <b>v2rl</b>   |  |          |                                             |       |                        |          |          |   |
| 1                                                          |  | Sc-V2RL4 | sf38213                                     | 393AA | Found in this study    | 4290     | 11993    | + |
| 2                                                          |  | Sc-V2RL1 | sf38988                                     | 435AA | Found in this study    | 10136    | 4799     | - |
| 3                                                          |  | Sc-V2RL2 | sf98342                                     | 358AA | Found in this study    | 3522     | 4595     | + |
| 4                                                          |  | Sc-V2RL5 | sf82161                                     | 304AA | Found in this study    | 5087     | 4176     | - |
| 5                                                          |  | Sc-V2RL3 | sf8910                                      | 557AA | Found in this study    | 17598    | 1456     | - |
| <b>Callorhinus milii</b> <b>elephant shark</b> <b>v2rl</b> |  |          |                                             |       |                        |          |          |   |
| 1                                                          |  | Cm-V2RL3 | SINCAMP00000007400_07481 SINCAMG00000004834 | 825AA | Found in this study    | 2988049  | 3001242  | + |
| 2                                                          |  | Cm-V2RL2 | SINCAMP00000020270_20473 SINCAMG00000013232 | 873AA | Venkatesh et al (2014) | 166981   | 171510   | + |
| 3                                                          |  | Cm-V2RL5 | SINCAMP00000024414_24667 SINCAMG00000015837 | 858AA | Found in this study    | 5258189  | 5274003  | + |

**Dataset S2. Amino acid sequences of receptor families ORA/V1R, TAAR, OR, V2R, and TAS1R in catshark (Sc), Spotted Gar (Lo), and elephant shark (Cm). A gene name ending with “Ps” indicates a pseudogene. An asterisk in an amino acid sequence represent a stop codon. In catshark, sf refers to scaffold.**

**ORA/V1R**

>Sc-ORA2\_sf1492

MEGRSIVKGTLYLLLTVIGIPGNLTIVTSFIHIACYDHKLLPADTIVSNLASVNLIVVLV  
RCIPETTAAFGLKQLFDDYGCKIVIFIYRTRTRALSIWLTFLLSGFQCITLAPVTSTWSTIK  
RQAAKYLSAVIAFLWVLNMSLSTPAILFSISSENNASAGNKHAVNLEYCLVKFPSQTVK  
LANGALQTSRDVPIVLMVLASAYILLVLYRHKQQVKGIRSSSKNQGSTIETRAAKAV  
VTLVTLYVLFVFGVDSILWIYTLTVAKTMRTSLISDLRVFFSSLYASVSPIVVIISNRKVH  
NKLKCVKAKPETMLSE

>Sc-ORA4\_sf75446

MAEHPVQVFVYALVVSCGIFGNALVLWIAADSTRENYLASSDLILMNIAAANLMIS  
LTRNTLLTTFDAGQSVSFSVGCRLMMFIWTWLRASAGIWWTSLSLYHFITIRTSRTM  
LEKLSERRKVVKALVVEWVLNLVYASFALPYSSNSKNNSTNNLTVISSTIRPLLGCV  
WTFPNESIGLTYAMVSVVIHEAIPVSLMIFSNSATLLFLYKHHRKTRDVQFSSVHGSTE  
WKAAKTILYLILFIVSWGTHVISVNYNFNGSPSTRYMLIARFSASGFVGFYPLVVA  
SGHSLRKRMRNILK

>Sc-ORA3\_sf4878

MEFESTAELFFYGLLVFLGVWGNILVLVTIFATTVESHGCLAASDIILTNLAAVNLLISIF  
RNILLVITESRVKILLSLSWCRVFMFLWMWLKSVSVWVTFCLSCFHFLKIKQHVHLST  
KMKEIMYVLAILVGVWFVNFLYSIPAFIYSQTASGNETKILMVVSTTMEPFLGCVWK  
FPTHESGIIFTAFTLVHELPIIFMVCTNLSTVYYLSKHIRTIADEHLHSVQVERMATK  
LIMALVTLFVLCTGTHLLAVSYYNHNGGPATAFLTLAKYCATIFIGFSPLLIAAGHSK  
LRHKVCKVLHIKI

>Sc-ORA5\_sf55821

VWFNSSFSYSFTGNVFFVSLAFADLVVAVYPYPLILFAMFHNGWLLGDIHCKVSGFL  
MGLSVIGSIFNITAIANRYCYICHSLAYDKLYSCRNTLIFVFLIWWLTVLAIVPNFFVGS  
LKYDARVYSCTFVQTVSSSYTIAVVVIHFLVPITVVSFCYLRIWILVIQVRRRVKTDVR  
PGLKQSDFRNFLTMFLVFLFAFCWAPLNFGLAVAINPQKIAPKIPWLFVLSYFMA  
YFNCLNNAIYGLLNQNFKEYKRIIMSLWTPRRLFQETSKGGTEAQKTKPSPAINND  
QARANSL

>Sc-ORA6\_sf97348

SQHSPEVYLIKTFYPATSCTKRTLSGDRMDGIAFIYAGNLSNLFNFERNFTLGHYDQ  
CYSPTAMIFVLALVYSAIILGVFGNLLLITIVMKQKEMHNVTNILIVNLSVSDLLISVM  
SLPFTFVYTFMDHWIFGEAMCKLNSMIQCISITVSIFSLVLIIVERHQLIINPRGWRPTN  
KHAYLSITIMWALALLTSLPFLFHVLTDEQFQYDPKYSKEFAGKYLCIDQWPSENQR  
LVYTTCLLMQYFAPLCFIFICYFKVSGKKYLGFMLIWSICL

>Sc-ORA7\_sf96894

FFILLYCALVAVACVGNVFLVGSIGDKKLHNATNFFIGNLSVTDLLMCLTCVPLTLS  
YAFELRGWLFGRFMCHFVSLMQSAMVYVSVLSLTAIAVDRIYVVA YPIRQRVTLSCC  
ALIVGGIWALSLALASPASIYATYVELKVTGNDVNICEEFWRGMETERLAYSCVVILV

SYMIPLLAVTISYCAITVHLKRRNVPGAVEQNQVRWNRKKRKTFFLLVISVVTFAICW  
MPLQILNLIRDLDVDFTIIDTRYINVVQVSCHWVAMSSSCYNPFYIYASLHRKFR

>Cm-ORA1\_XM\_007894309.1

MELCTVVKGTSFLLQTAIGILGNLTILLSYAHIGYSDRKLLPVDVILTHLAFVNLMVVL  
TRGVPQTLVTFDVANLLNDAGCKIVIYAYRVVRALSV CETCLLSVFQGLTLMPVTSK  
LANYKRKAGRSIGPLAAALWALNIALCIAAPLFSVAVANSTVSNFTLDLGFCLVGFDP  
RVSYYVNGVFISTRDFLVGLMTFASGYILLILHRHRRQVRAIQRAGSAQQAENR  
AAKSVISLVSLYVVFVFGIDNLIWIYMLTVPLVPPDIADLRVFFSSCYASFSPLLIISSTKK  
IKSKLFRATPQIGPRPPSTEMSHVQQ

>Cm-ORA2\_XM\_007894310.1

MEGRSAIKGTYLLLTVLGIPGNLTISSFVHIAQHDRRLHPADKIVGNLALVNLA VVL  
VRCVPETTAAFGLEQLFDDNGCKIVIFIYRTRRSLSIWLTFLLSGFQGITLAPSTPKWSI  
AKRLAPRCLPGALALLWLLNMCLSTSAILFSISSGNNSTRKKFAVNLEYCLVKFPSRA  
VKIAIGALQTSRDVIPIALMILASAYILLILYKHHQQVKGLRSSSKGQRSSAETRAAKA  
VLTLVTLYVLFVFGIDNIMWVYTLTVAETMQTSVTSDIRVFFSSLYASVSPIVIIASNKKI  
QNKMKCTKAKPEMEASETVP SHN

>Cm-ORA3\_XM\_007906972.1

MTYQFNPHIIFYGALIFLGTGNFLVLATILAIVLEDHSFPSSDILLTNLTIVNLLISIFWN  
IPEFILESGVEMLLPLSWCRLFMFIWVWLRCSVWVTFLLSLFYFLKIKQHVRLSTKAR  
EATFVSATLLAIWLVNFAYAIPALFYAKATSGNETVSLMIVSTTVKPF LGCVWNFPNA  
QAALAVSKSYLVIQEILPMLLMLGTNLSTVYYLQKHMRSIGVERLHSLQVERKAAKV  
IMALVTLFVLCWGTHLLAVNYYSYNRGSATSFILTLANYSASLFIGFSPLILAMGHGK  
LRGKICKILRIKLT

>Cm-ORA4\_XM\_007906911.1

MAEHPVLVVAYGLLVSCGILGNSAVISVTMDSTCERNRLSSSDLILINIAVANLLLSLT  
RNTLLLTL DAGLPVSFSSEGCRLMMFVWTWLRSTSIWVTL SLSWFHFVTVRTSRGAL  
ERLSERRRVIALMAAEWGVNLVYSGFALGYSSNSTNSTNHLAVISSTIRPLLGCVWTF  
PTKQSGFIYALVSVVHEAIPVVLMLYANAGTLLFLYQHHRKVQDSQLAGGDRISHE  
WRAAKTILYLIGLFVFCWGTHVLSVNYYNFKGSPSTHYLLVIARFSASGFIGLYPLVV  
AMGHSKLKHRLKNILKCLCP



**TAAR**

>Sc-Taar1a\_sf32353

MNTSLRNTEMVEFCYEFVHGTSCANATRSHGVRAALYAFGAVAILVTIFGNMLVIISI  
SHFKQLHTPTNYLILSLAIADFSLGCMVMPYSLMRSIENCWYLGELFCKLQASDFMFL  
CAASIFHLCFISVDRYYAVCDPLKYKTRITLQIVLIMIFLSWILSAFVGFGMICLELNLIE  
IRDFYNNIYCYGGCILVMGKLCSVIYSLISFYFPGFIMLCIYTKIYHVATKQARAINDI  
TRQIQTIKDKTKVTSQTSERKAAKTLGIVVGVFLICWSPYFTCNFIDPFIEHSTPPIMFD  
LFFWLGYLNSAFNPVIYAFFYSWFRKALKIVLTFKIFSTDSSRINLF

>Sc-Taar2\_sf155079

MNLADLENSEDVQYCFEFINTSCPRVTRSTAANATMYIFITISILITIFGNLTVIISVLHF  
KQLQTSTNCLLLSLAVVDFLVGFIVLPYSMVKSVETCWYFGEMFCKVHSIIDIVLTVV  
SIYTLCFIAIDRYYAMCDPLLHPIKITLPVTIVTVILIWLFATFYGFSVFLDFSKKSVDD  
YIAKSCEGSCIA YHKFEGHVDALIVFFIPIFILGIYVKIFFVARCKCDRKIGSLPNNSKH  
TVENIKILDKKEQIVIRNQDILIGIFTSWLPFYVNSILNPYFNFLIPSSLDVFAWFGFFN  
CALNPLLYAFLYPWFRKTLKLILSCQIFHPGSSTIIFSE

>Sc-Taar1b\_sf112989

ETTEAIQCCFEFVNGSCP KATR SNGLRYTMYIFMVL MILCTLIGNMLLIISVLHFKHLY  
TPTNVLILSLATADFLGCLVMPYSMVRSVETCWYLGQLFCKIHSSCDIMLSTASILHL  
CVISVDRYYAVCDPLRYKIRMTFSSVKLMIIFSWAISAVFAFLIFLELNLKGIEGFYSN  
HTACYGSCVIMFSEISGVVSSMISFYIPGVTMLCIYCKIYFVAMKQVRCINRITVQISSL  
QDSKSGSSRNNERKAAKTLGLAMGVFLMCWTPFFICNTVDGFVNYTIPPVLFDALV  
WFGYLNSTFNPIIYGFFFSWFRKAVSIICTCRIFQPGSSR

>Sc-Tar13\_sf169680

GQCLSSTGRSAVKPGLYIFITMIMMATMVGNCLVVLAIIFYFKKLR SITNAFVLSLAVA  
DFLVGIMVMPYSMIRTIEGCWHFGPIFCQIHSSLDVMFCTASILHLSCIALDRYYAVCD  
PLAYHCKMSPGKV VILLFVCWTVPAAISFIPIMLQLHKFNIPDLLTKSSCVFMVNPIY  
AVCASLIAFYLPMTMLAAYWKIYRAARKQAIQIGAVDNQIQGCASGFVTAHCHKQS  
IKRERKAAKTLGIIIGAFVFWLPFFTANIVDPFLGYKLGRVTWEVLIWLGYSNSSLNP  
FLYAFFNRSFRAFLNIISCKICAPRS

>Sc-Tar14\_sf110123

GNLLIIVSIA YFTKLRTPTNAFIMSLAAADFLVGVTVMPFMAKVVFGWHFGKTFCK  
VHTIMDVLLCTSSILHLSCIAFDRFYAVCYPLKYRFRMSQRRVTILLICWILPASVSV  
VPLLLDANLRGLDLQLDTHSCTFIVNIPYAVSASLVSFFLPMLVMLVA YGKIFQVARM  
QAKQIYSIGNGFQGN SVRTRQSASMKKERKAAKTLGIIIGCFLLCWL PFFTNIANPLL  
GYSMPHVLLVFLWLG YINSMFNPLLYAFFNKSFRRAFCLIMGCKILTND CQNNNL

>Cm-Taar1a\_AAVX01005735

LCYESVNGSCPRAIRSTGVRITLYLLAVLAILVTLFGNMLVIISIAHFKQLHTPTNYLVF  
SLAIADFLGCIVMPYSLIRSIESCWYFGILFCKLHTSFDLVLCAASIIHLCCISVDRYYA  
VCDPLKYKTITVSTVLIMICLSWALSFLVGFVIIFLELHLIEIKDFYYHEIACFGGCTL



MMGKVCALVYSTISFYFPAFIMVCIYTKIYLVAKKQARTINNLSRKVQPINEGNSIASQ  
RSERKAAKTLGIVMGVFILCWSPYFVCDSEPFIKYSTPPVLFDAFFWVGYLNSTFNPM  
IYGGFYSWFRKALKIILTCKIFAPDSSRINLF

>Cm-Taar2a\_AAVX01045569

MNSINLENSEDLQYCFEFNMSCPKSIRSTTTTTVTMYIFITISIVITILGNSVVMISILHFKQ  
LQTPNTYLVLSLAFVDFLMGFFVLPFSMVRVSVETCWYFGDTFCDIHSTLDVVLTTVSI  
YNLCFIAIDRYYAVCEPLLYSIKMTLPMTALIITLNWLFIIYGSCVFLSEFTKKASGHY  
RTTISCKGSCIEYRFGGHMDALIVLFIPTFIILGIYKLYFVQRKHARKIGNMPNNINSKE  
EINVRVLQTKKTAANKQGVVMGIFVLSWLPFYLSSIINPYLNFATPPILFEAFTWFGF  
FNSAFNPVLYAFFYPWFRTALKSILTCQILRPESIMNLFPE

>Cm-Tar14\_NW\_006890197.1

IGCVGLTVTGRQSQGMDTSHSPFFNYTLSCNSSESVPYTARQVIQCVTTLSVLTIITLLT  
VLGNVLVIASIAFYFTKLQTPTNAFILSLATADILVGLVVMPPFSMVKA VFGWYFGRIFC  
KIHSIMDVMLCTSSIVNLSCIAFDRYFAVCYPLKYRFTMSRKRVTFLLLICWILPALVSI  
VPLVLDLHVIGLEDSFEQLDSQDCVFVNIPYSVTASIIAFYLPMPVILVAYAKIFLVAT  
NQVREIAARQQGMNLEMIQQNSSIRKERKAAKTLGIIIIGCFLLCWVPPFTLNIIDPLLG  
YQADSILIEVFLWLGYL  
NSGLNPFLYAFFNKSFRRAFSMIISCKIITKDCHYNLAGSTKLNTRLKTISRQFTLTSE  
LFDEEE

>Cm-Taar1b\_XM\_007899230.1

MNTSHFENTETVQYCYESVNGSCPKAMRLNIPHVPMYIFMTGTILFTITGNMLVIIAIS  
HFKQLHTPTNLGCLVMPYSMVRSVEPCWYLGKMFCKIHSSCDVMLCTASILHLCFISI  
ERYYTVC DPLRYKVRMTLFSVLVMIFISWASAVFXFCMVCLELNLEGIKEFYNNIA  
CYGGCILMLTETTGMVASVXSIFYVPGTTMLFIYK  
IYLVAKKQLRTIHNVAHQIHTIEENKHRMSQNNERKAAKTLGIVMGVFILCWSPFFIC  
NTVDAFVHYSTPPVLFDAVWFGYLNSTFNPMIYGGFYSWFRKALKIMLTCKILKSVS  
SRTSLF

>Cm-Taar3\_XM\_007899302.1

MYSTASNLSMILVPKLFDSYQPVLCFTFLWFLSIVITVLGNQMVTISISHFRQLHTPTN  
CLVLSLAIADFLVGLLVMPYSMLRLIETCXFYGNLFCCKIHSSLDMMMSTASIFHLFCIA  
IDCYYAVFDPLLYTTKITPPVITTFVA VSWVPTIFAFGVVFSEINLAGIENLLETSSCM  
GSCALLFNELSVSSGNRVFIPSIIMLGIYIKRFLVARKHARAIEGVTEKNNEGKTNRISR  
NKEHKPAKTLGLVMGIFLIYWVPPFITIIDPIINFSTPPIIFDTFVWFGYFNFAFPILYA  
FFYPWFHKALKLILSCLFSDSDSSTINLFPK

**V2R/V2RL**

>Sc-V2RL2\_sf98342

YLTFEISDALRCYPCLADEWAPPGSASCHKKSIIFLDWSNGFSIVLLTLSAFGIVLIIVISI  
IFMKNVKTPVVKSSGGTMSFIMLISLLLSFLSVGLFIGKPNNDITCKIRQCLFGISFTLAVS  
CAVAKSLKILLAFNPNANRNHLKLYNYGFITSFCTGLQVVICTLWLVFNGPKALR  
DVSRLQREILVECSEGSYLAFAVMLGYIAFLALICFTFAFKGRKLPENYNEAKFITFSM  
LIYFISWITFPVYVTTTHGKYLPAVEVVAILSSTYGILCCQFFTKCYIILFKKDCNTTTSF  
LENLYDYSLKSSNIITNHSSKCKSIKTNNSQNSLNVTPISSVQNNAITNVSRRKRCSSW

>Sc-V2R1\_sf5423\_sf36572

MELLYFRFLVYFTISVTVSGKKTCKLKGTFNLNSFKTPGDVIGGMFPIHYRVVASN  
SSSSTSPQSSGCEGFNFRAFRWARTMIHAINENQNSILPDIQLGYTIYDSCFTISKAVE  
GTLTYLTGQDEAVPNYRCNGAPLAVLIGAGGSALSATARILGLYFPQVDYSASCS  
VLSDKFQFPFIRTPSDIFQSRAMAKLVVHFGWTWVGTIASDDDYGKYGIKNFKKEEV  
EKVGVCSIFSETIPKVYAREKIDRIVDTIQQSTARIIAVFSADIDLSYLMEEVLRNISR  
TWIASEAWINSALISKPEYSSLLSGTIGLAIQRADIRGLQNHLIQLDPINAGEKLITFEW  
ERAFDCMWPESGVAVSSMFDAEKTDTNRTGIKNRIHNIPPLSQRFCGKENLDEIYNT  
YTDVSQLRLTYSVYKSVYTVANALHNLHTCKKGEGPFVGGSCANITDFQPWQXXXX  
ITLWKILLNLYQCSIWQPPFVCSSESCQPGTRKGRQGEVCCFDCIPCADGEITNVTD  
RECIQCPEDYWSNANRDECVHKLIEYLYGNDALGMALIALSIFGACIAAAIAIAYMVR  
RDTPLVKTNDRGLSFVLLFSLVICFLSSIVFVGLPVAWSCMTRQVLLAISFSTCLSCML  
SKAVNLMLKARANKAKSPEGTKKSLSHFQQRMITLAFVVSCHACLCAAWLLILPPHP  
IKNTQSQNIKIIMECNEGSVIFLCCVLGYDLLAAICFVFAFISRKLDPDNFNEAKFMTFA  
LLVFFIVWISFIPAYLSTRGKYMVAVEMFAILASSFGLLACLFVPKCYIILLKPERNTEE  
LVKGTNDANDKSAPPTSQSVTSSAISTTCSTVELN

>Sc-V2R3\_sf20408

MKVAMNFSVHFVLIIFSLSLSLCGAIDPSCKLEKFNLYGVHKDGDIIIGGLFPVHFTVT  
LPELSYKMKPEVLQCEGFNFRTFRWLQMMIFTIEEINKDQTLPSIRLGYSIYDNCRKV  
PQAVRAAVTLLNGADNIFKNSKCTGPPPIPAIVGDARSTQSIIGRIAGRFGIPMVRKVS  
YSSSCSCLSNKLEFPTFFRTIPSDSFQAKAMAQLVKHFGWTWVGSATQDDYGQYL  
QLFNKQVQNYGVCLAFTEAIPKIPSRDKILQIVDTIKRSTAKVIVLFAFVGDIVNLANE  
VVRQNITNKQWIASETWSTAALLATKKNFRSFGGTIGFAFNKGEVPQFKKFLKVRP  
TSIPGNLINFWEKLFGCTFNPPDNTRYAIAISSEPICTGQEDIEKTDSVYNDVSQLR  
VSYNVYKAVYIAHALHNLVNCEPNKGPQNKTCANISHLAPWQLLHYLKEVNFTN  
KFGEKVYFDENGDPDIASDIMNWQMDADGSVKIVTVGLFDASAAPGQELLIDEDLLI  
WGGGQTKTPSSICESCPGTRKAARKGQPVCCFDCLQCAEGKMSNQTDSIHCLTCPI  
DYWSNQEHQDQCVLKEIEFLSFEDTLGILTTIALFGTSITTIILVIFIRYRNTPVVRSNIE  
LSFLLASLLLCFLCSLTFIQPTAWSCILRHTVFGVVSFALCISCILGKTIVVLMVFSATL  
PNNDMMKYFGPLQQRVSVFACTFLQVIICILWLATSPPFPVKNIKYQNAKIILECDVGS  
VTAFCVGLGYIGLLAAISVVLAFARKLPDNFNEAKFITFSMLIFSAVWVTFIPAYISSP  
GKYTVAVEIFAILCSSFGVAACNFAPKCYIILLKPDQNTKKNVMGRPAAAST

>Sc-V2R14\_sf20916

MCFPLCLSLFLLKSAIAEASDPMCRHQGKFDLSGVSRRKGDVVL TGLFPIHFRTIQPNLS  
FHEEPSPPVCDGFNSRSFRWMQTMIFALQEINKDPMLLPNITLGYNIYDTCTTPTHSLR  
AALTLASGPYEDASNYNCEGTSSIPVIVGDSGSTQSLVVARTMMSFNIPMVS YFSSCT  
CLSNRNEFPAFFRTMPSDAYQAKGVARLVQRFGWTWVGS IAGDDDYSHNAIQAFSD  
EVRKLGVCIAFTEVIPKVYSRRKILQITETIKASTARVIVMFALEGDAYPLISEVVKQNI  
TGRQWIASEAWVTSALIATKENFLSLSGTIGFAIHRAEIPGLRSFLLQVHPFKTPNNLF  
VKELWETIFNCSFGMAVEQKKGKSPASISSQKKCTGLEELTNTYNIYSDVSELRISYNVY  
KAVYTIAHSLHNLVSCENGKGFENQTCANIFDVKPWQKTKLLYNNVSNVTVHQRKS  
SLTISRICSVIHYEMIHTFVSFSLTCQAPESLCSKHCLPGTRKAIRNGEQICCFDCLPCAD  
GEISNET

>Sc-V2R12\_sf3790

MHYRFGLLLFLCAYILASVDAVCKVERKLNLPGLVNDSLITIGGLFPVHFRVVEPDLT  
FKTQAESLHCEGFNFRAFRWVQTMIFTIDEINRDPSLLPNITLGYRIFDSCDTHFQALR  
AAVTLINGQEESVIDYDCTPSTLAIIGDSGSTQSMVTRMLGLFRIPLVSYFSTCACLS  
DKAEYPAFLRTVPSDYFQVRALAQLVKHFGWTWVG TIAGDDDYGRYGIQMFSEQIE  
ALGACVAFSHTIPKVKTKEQIEAIVNTIRESRAKVILVFAIEQD TDSLIEVMRQNITGI  
QWLASEAWVTSAMLSKQDNTILVGT LGFALRRAQIPGLQQFLQKVHPSTAAQNVLV  
TEFWETLFQCSLQTSENGTSQCTGSEDIKSRVNIYSDVSQLRVSYNVYKGIYAIAHAL  
HNLSACKDGKGFENN SCANTVDIKPWQLLHYLKHVNFTNKLGE EVVFDENGDPNP  
SYDLINWRKTADGSVRYVAVGQFGGSFDSNRLEIDESAIWNN GKKEIPRSSCSVG  
CVRGTRKAVRQGPACCFDCISCADGEISNETDSIECIKCHLDYWSNSLKDRCLPKDI  
EFLSFEDPLGISLVTFALCGASLTIGAAA VFTYYRNTPIVRANSEL SFFILLSLVLCFLC  
SLTFIGKPTIWSCMLRHTLFGISFVLCTSCILGKTIVVLMAFRATPPNSDRMKWFGPVQ  
QRVIILLCTCLQIII CLLWLTTSPPLPVKNTKYQNAKIILECDVGSIKAF AFLVLYGIGILSS  
SCFLLAFFARKLPDNFNEAKFITFSMVIFFAVWVTFIPAYVSTSGKYTVAVEIFAILASS  
FGILSCIFVPKCYIILFKPEKNNRKHLMCWRSAD

>Sc-V2R4\_sf5901

MYWKLSFVLLHSLSPQSKATGLCKLQGNFVSPGMAHYSDVTIGGLFPVSLYVNVPE  
LHYRAKPEELRCTGFD FRAFRWLQTMIFTIEEINKETRILPNITLGYRVYDTCDIYSLR  
AAMTFLSGAEELMSNNTCRGAVSVP AIIGEAGSLQSSIIASTTGPFQIPIVSTTGPFQIPI  
VSTRGPYFSTCTCLSDRRKYPAFFRTAPSDYFQTKAL AQLVKHFGWTWIGAFGNDDD  
YGRFGIQQFIEQVTD FGAFCVAFSYILPKIYDAAKISQMVNVIKRSSARVIVVFTPEREM  
LQIIEEIARQNV TGIQWLASEAWVTGSVLYTEQFMPYLEGTIGFSFRRAEIPGLREFLL  
QVKPSPHQSNNYVNVFWEELFACKFKQPKNSTDGASIGARVCTGSE SLEDINTIYSDT  
SQLRVSYNVYKGVY AIAHALHRLSLCESGKGFINSTCASIHSFEPWQLLHYLKEVRF  
TDHFGGEIGFDENGDAIASYDMINCQRGPSGNIEYVQVGRFD AFAAAGQELSLEEHSI  
VWTGGKAEP PWSACSESCPPGTRKASRNGEPLCCFDCVPCAEGEISNATDSVECKKC  
SSDDWSSSDRTVCIPREIEYLSYKDG TGMTLAIALLGACLTVAVLAIFFRHRDTPIVK  
ANNSELSFLLLSSLVLCFLCSLTFIGRPTLWSCMLRHTVFGV VFLCISCILAKTVVVL  
MAFRATLPSSNVMKWFGPAQQRAVIFLCTCVQVGICAAWLVRSPFPPIKNTTYQSAK

TILECNVGSEVAFYTVLGYISFLSCICFVLAFLARKLPDKFNEAKFITFSMLIFFAVWVA  
FIPAYVSSPGKYTVAVEIFAILSSSFGLLLCIFAPKCFIILLRPENNTKKMLMSKG

>Sc-V2R26\_sf33886

MYIILSLFLPLSLLASVLLKNEPTCKQWGTDDLGLSKEGDIIIIGGVFSVHTNVDRDL  
LSFESKPEAVKCKNFWRVFRVFLTMIFAIEEINKNPRLLPNITLGYRIYDTCTMPPLT  
LKSTFEFLNKGEDSSSNLACKAPSTVSAIVGDSGSSQSVAMATLIGPFRIPMVS YFSTC  
ACLSNRKKYPSFFRTIPSDYFQARALAHLVKRFGWTWIGTIKNNDDYGNFGMHAFTE  
AVQQLGVCIAFSEAIHRTYHRDQLLRIVEAVKTSSTKVVVAFVAPAEMTVLLNEMVR  
QNVTVGVQWIGSEAWVSTQFLPQEESSRFVSGTIGVAIRQVDIPGLRDFLLDVHPSMYP  
GNALMKEFWESTFRCTLMSKEDTTDEEPSTSLKECTGRETLHSVHNEFTDVSQYRVT  
YNVYKATYAIHALHNMVSCKDGNPFPQKSCANTSSFPWQLLYMKTVNFTTKI  
GGNTYFDDNGDPVATYDIVNWQPNAAGGVNIVGVGVYDRSAPSGQEFVIRDEAIVW  
TGGQITVPRAVCSSEPCQGRKATRKGEPLCCFDCIKCADGEISNITDSDPCMCKPWD  
YRSNQQRDKCILKEVEFLSFAELMGILLVTLALFGASLTMSIFVLFHVHRDTPIVKANN  
SELSFLLLLALILCFLCSITFIGEPSTWSCGLRHTAFGIIFVLCISCVLSKTIVVMAFRA  
VLPGNKMRWFGPVQQLSVCALTLVQCLICTIWLRISSPPYPLKNSAYFKDIIVFECN  
VGSPIAFYCVLGYIGFLSCVSFVVAFLARQLPNNFNEAKHITFSMIIFCAVWITFIPAYV  
SSPGKYTVAVEVFAILASSFGLVFCIFVPKCYIILLKKEMNTKKHMMDKMASKNL

>Sc-V2R23\_sf28714

MHLSLTGGIFVSILASLWGNDENVCKQWGTDFLPGFFKDGDVVLGGLFSVHSNAEH  
QEFSFLNQPDVAVKCKSFREFRFVQTMIFAIEEINNDSSLLPNITLGYRIHDSICALAHL  
SMKATLQMINTEGAASSEAICTSSAVSAIIDSSSSQSVAIATSISPFRIPVVSYFSTCA  
CLSNKVEYPSFLRTIPSDYFQAKALAVLKRFGWTWIGTIRSDDDYGNFGMQAFTEA  
VQQLGVCIAFYFESFHRKYPRERLLRMVEVIKKFSTKVIVAFLAQADMAILREVARQ  
NISGIQWVGSEAWISTSLVTPQENRQFLTGAIGIAIRKEDVPGLKEFLVNIRPSVYPRNA  
LMKEFWEASFDCILGATEHKPEALESPLKTGCKGKEQLQELTNAYTEVSEFRITYNV  
YKAVYALAHALHNMLTCERGGKPFENGKCAMISAFEPWQLLHYIKSVNFATKAGEK  
VHFDENGDPVPRYDIVNWRPNDFGGADVLTVGAYDGSAPPKALTLKEELIVWSSG  
KSEIPRAVCSSENCPPGTRKAAKKHQPLCCFDCIPC GDGEISNTTDSIHCICPPEYWTG  
LKRQDQIPKQIEYLGFTIEIVGIVLMALTIVGAVLTMGVAALFFVYKRTPIVKSNNSELS  
FLLFALTLCSLCSIFMGEPTFWSCIFRHVTFSTFVFCVACVLGKTVVVVMAFKATV  
PNRNMK YFGPTRQRLTVCAL TMAQSFICTIWLATSPFPKNTNYFKDKIILECDVG  
STTAFYCVLGLGFLGLLSCVCFVVAFLARKLPDNFNEAKFITFSMLIFCTVWITFIPAYTSS  
HGKFTVAVEVFAILASSFGLVFCIFAPKCYIILLRPEYNTKEHVMGKVNSSKLL

>Sc-V2R13\_sf120645

FDFRSFRWVQTMIFAIREINKDQMLLPNIKLG YQIYDTCAHTQSLRSALASTSRQSGR  
SDETSSQDCEGFSSFPVIVGDSGSTQSMIIQRTLGPFRIPMVS YFASCACLSHRNKFPAP  
FRTMPSDAHQAQGVARLVQRFGWTWVGS IAGDDDYGHNGIQAFSDEVKRLGVCIAF  
TEVLPMHSRRKILQITETIKASTARVIVMFAIEGDAYPLIREVVKQ NITGRQWIASEA  
WVTSALIATKENFLSLSGTIGFAIHRAEIPGLRSFLLQVHPFKTPNNL FVKELWETIFKC  
SLGTSENIKGMNTS AIAHRRCTGLEDLNNTYSIYSDVSELRVSYNVYKAVYTIAHALH

SLNSCKDGTGSLPNNTCATIFNFKPWQLLHYLKDVRYTNKFGEEVYFDENGDPISY  
DIINWHKNADGSIKYVKIGRFDATLGLGHNLLINEQNIVWHNNQMTVSWINCSLI

>Sc-V2R10\_sf16807

FSQSGLRWALTMVFAIEEINGNPELLPDTTLGYKIFDSCDAPSEGLKGAFKLLKGKDRI  
ISNSTCAGIPSVSMIVGDGGSSQSIASRVVAPFAIGMXVSYFASCACLSKREFPTFFR  
TIPSDTIQMRALIRIIHYFKWSWIGAVAEDNDYGRFGMRALIEEAAKFEICIA YIEFLSP  
GRTRERMQQVANTIRKSSAKVLIIFCGESDTLSLVNELKMQNITDIQLIASEAWVTSFQ  
LWTAETWDILTGTMGFGIRRAEITGLREFLVKLHPSTATGNPFVEELWREIFGCSVHIS  
NQTLLGGHIAASSYRPTGLENLGTIESTFTDVSQLRVSYNVYKAVYAAAHALHNLQA  
CEHGKGPFPNKTCGQKSNPLSWQLLQYLREVRFTNQFGEEVSFDEAGDPIASYDLIN  
WQKLPDLSVDFVKVGYDAAMPEGEELALYESRIIWHRTAMENKVPVSACSDNCGA  
GTRRAARKGQPVCCFDCLPCADGEISNQTDSIECIKCPNDWSNVPKNQCPKEIEFLS  
FHDTMGITLAAISLFGACITGVVA AVFLYFLNTPIVRANNTLSFLLLISLILCFLCSITFI  
GQPTPWSCMVRHTVFGVSFVLCISCILSKTLVVLMAFKATLPASNVMKWFPGKQQRS  
IVFLCTLIQIIICVIWLVTSPFPKNTKYQRAKIILECDLGSTVAFWCVLA YIGLLACM  
CLILAFGLRALPDKFNEAKFITFSMLIFFAVWLTFIPTYVSNPGKYTVAVEIFAILASSF  
GLLICIFSPKCYIILFKSEENTKKHLMGKNAQP

>Sc-V2R34\_sf17118

MHHISLGLFAVAGAAVSQPDCQLQGNVDLPGISENGDVILGGMFHVHSHRLERIDR  
FKQSPEQPRCKGLTMIFAIEEINRSRTLLPNITIGYKILDDCASTTTATQAALTLANGRE  
ELISANDCKGLPNVLAIIIGGGSSQSIARTIGPFGMPLISYFSTCACLSNRQEYPAFY  
RTIPSDYYQSKLLAQLVKRFGWTWIGTVRSNNDYGNFGMEAFLEDIEELGICLAFSVS  
FSRTDPREKVAEIVQVIKKSTTKVVVFSAKREMRILLREIVRQNVSGIQWIGSEAWV  
TAELLTAEESTNFLTGTIGPAIHLAEVIGLREFLLQVHPSAAPDNSFVTEFWETTFKCTL  
QSDSGFESDAAPEIPQCTGHESLHGVNNA YSDLSMDGSSYNVYKAVYVFAHAVHDL  
LACKDGGKGPFTNGTCAHISTYEPWQLLHYMQAVNFTTTSGETVYFESSGDPVAIYDL  
MNWQVNTNGFPEIVNVGYDASASSGQAIVLNEKAIWNNGGKNKVPRACSESCLP  
GTRKVSRRKGQPACCFDCIGCPAGEISNTTDALDCITCPLEYWPNPNKDKCSPKEIEFLS  
FEETLGIVLVALALCGICATIATAGVFLQYKETPIVKANSEL SFLLLFALTL CFLCSLT  
FIGQPSFWSCMLQRVSFGITFVLCISCVLTKTILVLMAFTATLPNNNLMRRFGPTQQRF  
GVFGLTFIQGFICTIWL SIAPPFMKNTSYREIIIIECHVGSTTAFYCVSGYIALLSVCV  
FVLAFRARKLPDNFNEAQCITFSMLIFCVVWIAFIPAYVSSPGKYTVAVEVFAILASSF  
ALLLCIFVPKCTIILLKPETNTRKHVMSKLP

>Sc-V2R33\_sf132767

LLHYMNSVHFTTTTGEKVYFDDNGNPTAGYDLVNWQKNAKGGIELKIVGQYNGSA  
PPGKELVLNPKHVIWSSGGREIPPAVCSESCSPGTRKMARKGQPVCCFDCTACADGEI  
SNITDSADCIKCPFLHWPNDGKDECIPKEIEYLAFTAILGIVLVTALIGVCMAINIAVIF  
FRYRETPLVKANSEL SFLLLLALMCCFLCSVTFIGKPSDWSCMLRHTAFGVTFVLCI  
SCVLVKTILVLMAFKATHPSSNRMKWFQKQQRSLVFSLTFVQGLICALWLIIAPFP  
RRNTSHYREVIIECDAGSSTAFYAASGYIALLSCLCFVLAFLARKLPSNFNEAKCLTF  
SMLIFCAVWVTFIPASVSSPGKYTVAVEVFAILASSYGLLLCIYAPKCYIITITPEKNTK  
KNLMSKVIENEL

>Sc-V2R19\_sf122650

ISYFSSCICLSNKKEFPTFFRTIPSDYFQVA AFVQLVKHFGWTWLA AFGSDDDDYGH LGI  
SAFVEEVTKTGACVAFAEYLPKFNDKEKILHQVELIKNTKV K VILVF APEIDLNFLVEE  
LVRQNV TGLQWLASEAWSTAALLSTAANSEIMGGTLGLAIRRADIPGIKQFLVRLHPS  
NYPGNEYIKQLWEAVFHCTWTSHNDTENARLGPLKHLCTGQEDLKVAQNAFTDETQ  
LRVSYNTYRAVYAVAHSIH NMLQCKKGQGPVNETCPDISKLKPWQVLHYLKKVKF  
TTAFGDEVRFDVNGDPRATYDLLNWQRVPNGNMKYIKV GQYDASVGTGNQLVIEK  
EVIVWSGG EK MVIEAKCSE SCLPGTRKGARTGEPICCYDCIPCAEGEISNETDAVDCL  
TCHLDYWP NLERDKCILKEIEFLSFGGTMGIILTAL SISGACISMAVIAVFYHYKNTPIV  
KANNSELSFLLLFSLVLCFLCSLLFIGQPTIWSCMLRHTAFAIIFVLCISCILGKTIMVLM  
AFN

>Sc-V2R27\_sf130314

VSYFATCA CLSNRKEFP SFFRTIPSDYFQAKAL AQLVQRFGWTWIGTVKSDNDYGNF  
GMQAFTEIVQKLGVCIAFAQS FHRTEPEEKLLRIVHIIKTSTAKVVVAFLAQRDMAML  
LREIARQNISGVQWVGSEAWIATSLPPH NKRFTVGAIGVAIRAVEIPGFKNFLMRL  
HPSVYPGNPIVEEFWEKTFSCSLRETNTGNPPSAFHSNQCTGRENLLTVSNTYTDASQ  
LRVTNKVYEATYAVAHALQNMFSCEDGKGPFINKSCATISRFQPWQLLHYMQTVNF  
TTKIGERVNF DENGDSVATYDIVNWQLDGEGKAVVLT VGHYDGSASPGQQVVINER  
SIVWSGGQSK

>Sc-V2R17\_sf58048

ISYFSTCMCLSNKKEFPTFFRTIPSDYFQVA AFVQLVKHFGWTWLA AFGSDDDDYGH L  
GITAFVEEVTKTGACVAFAEYLPKFNDK GKILQQVELIKNTKV K VILVFAPERDLNFL  
VEELVRQNV TGLQWLASEAWSTAALLSTAANSEIMGGTLGLAIRRADIPGIKQFLVR  
LHPSKYPGNEYVKQLWEAAFHCTWTSHNDTENARLGPLKHVCTGQEDLKVAQNAF  
TDETQLRVSYNTYRAVYAVAHSIH NMLQCKKGQGPV NKTCPDISKLPWQVLHYL  
KKVKFTTAFGDEVRFDVNGDPPATYDLLNWQRVPNGNMKYIKVGEYDASVGTDNQ  
LVIEKEGIVWSGG EK MVPR SICS DSCPPGTRKAARKGRPICCFDCVQC GEGEMS NSTN  
SIDCMTCPSESWPNAQQDQCLEKKVDYLSFEDILGIVLTTLALFGASITATVGCIFLFH  
KDTPIVKANNSELSFLLLAL TLCFLCSLTFIGQPSGWS CMLRHTMFGVIFVLCV SCLL  
GKTIVVVM AFQAQLPSSNVAKRFGPSQQRLTVSGLTLVQCFICTVWLT TSPFPKANT  
KYFQEVILECDVGSEVAFYCVLGYIGCLSAVCFVVAFLARNLPDSFNEAKYITFSMLI  
FCAVWISFIPAYVSSPGKFTVAVEVFAILASSFALLFCIFAPKCYVILLR SERNTKKHLM  
GRVHS-

>Sc-V2R5\_sf21367

FNLRLGLRWVQTMIFTIEEINRDPFLLPKTTLG YKIVDSCDVSSEALKGALQILNGDEKT  
LPSDTCQGYSSVPLIIGDAGSSRSA AVSRILGLFGIPLVSYFASCACLSDKHEFPTFLRT  
VPSDAVQIRALLRLVNYFKWSWVG VVAVDSDYGRFGMQSFIEEIWNTNVCIAFMEFI  
PSGSANDRMSEIGD TIRKSSAKV IILFCGESDTFALIKELGLRNITDIQLIASEAWVTSSL  
IWTKESQEILGTIGFGIRRAEIPGLREFLVKLHPSTSPDNPFVEEFWQEIFGCKLKS RD  
QTSGQNNWLF SNKPCTGSESLNSEN IYTDVSQLRVSYNVYKAVYAVAHAHNLQSC  
ENGGKPFINKTCGQKSNIVPWQLLHYLKEVKFTNKFGEEISFDSNGDPIASYDLINWQ  
RRVDGTVDVFKVGLYDAALPEEKSLVLDESAIFWHGDQNSVPLSVCSYSCPTGTRKA

ARKDQPICCFDCLPCADGEISNETDSIECLRCSIDQWSNNEKNECIPRENEYLSFQDGIG  
ITLAAISLFGACITGVVAVVFLCFVNTPIVKANNSELSFLLLMSLILCFLCSIAFIGQPTP  
WSCMVRHTVFGVSFVLCISCILSKTLVVLMAFKATLPASNVMKWFGPKQQRIVFLC  
TLIQIIICVIWLVTSPPLPSKNTKYQSAKIILECDVGVSTVAFCCVFGYIGLLACMCFVLA  
FLARSLPKDFNEAKFITFSMLIFFAVWITFIPAYVSTPGKYTVAVEIFAILTSSFGLLSCIF  
APKCYIILLKPEENTKKNLTVKTDRN-

>Sc-V2R24\_sf20060

MHCFLLWVLLTMLAPARAAAYQPTCRHWEKFDLLSFSKDGDVVLGGIFSLHSSVEDSE  
FSFETQPKGAKCKKFDREFRFV RAMMYAVDEINRNPTLLPNITLGYQIYDSCGMPSL  
SIKAAFEILDGQRDADSEEDCRNIYAIVADSGSSQSAAVARLLNPF GIPMVS YFSTCAC  
LSNKEEYPSFFRTIPSDYYQARALAQLVKHFGWNWIGTIKSDNDYGNFGMQAFIEAV  
RELGV CIAFTESFYRTYPREKLLKTVRAVKESSTKVIVAFVAEGDMAILLKEIARQDIT  
GIQWIGSEAWISTPILPSEQRRKFLIGTLGIAIRQVNIPGFQEFMLQIHPSADPGNSLLEE  
FWESTFSCRLSSPRNKANGTEQECTGREKLQTIKNTYTDSSHLRVTYNVYKATYALA  
HALHNMFSCEAMNGASTYNACKHASNYQSQQLQYLKAVNFTTRTGETVHFDENG  
DPVATYDIVNWQSVGNGADVVS VGYDGS APPGQEFIINEGAVVWSGGQRKIPQAL  
CSTSC TTGTRKAARKGQPICCFDCIECAEGEISNVTD SVMCLTCPWDQWSNEQQNL CI  
PKMTEFLSFDEIMGIVLVTLALLGTGFTVTVTIIFYIHINTPIVKANNSELSFLLLSALAL  
CFLCSITFIGKPSIWSCILRHAFGITFVLCISCVLGKTLVMMMAFNATLPNNMMKW  
FGPIQQRLAVLILTLVQCLICTVWLIISPPYPLKNVDYFKDIIILECDVGSATAFYWVIG  
YIGFLSCVCFLVAFLARKLPDNFNEAKFITFSMLIFCAVWITFIPAYISSPGKYTVAVEV  
FAILASSFGLLVCIFVPKCYIILLRPENNTKKNLIGKVA-

>Sc-V2R32\_sf43102

MTVTVKVVFFWGFVFNFPVLVTCEEICKLQGKFGLSDITLRGDVVLGGMFNVHSDRLE  
RAHSFTNLPQETQCKSFDFRAFRLAQTMIFTIEEINRTPGLLPNVSLGYRIYDDCSSSTI  
ATKAALALINGNNQSVGETCGASSMISALIGGGSSSESIAVTRLIGPFRIPLVSYFSTCA  
CLSNREEFPTFYRTIPSDYHQSKFLAQIVNKF GWTWIGAIRINNDYGNFGMQAFIETVE  
KLGVCIAFSESFYRTDPREKILQIVEVIKKSSTKVIVAFSATREMRILLKELLRQNVTDI  
QWIGSEAWVTS DILAPEDNVKILVGTIGPAIRRSEIPGLRD FLLNVNPLPVPDNVLVKE  
FWETAFRCSLNPGNVTSQANYWAEMRRTGKERLDGLQNAYS DLGIDGSTYNVYK  
AVYALAHAFHNMFACEHGKGP FANKTCVQYPNFQPWQVLYMQSVNFRTKNGDN  
VYFDEHGDPVGTYDLVNWQLNSKGIAQIQAIQYDGSASPGQEVVLNRPVWRGG  
QSE

>Sc-V2R6\_sf21698

MYLHPFWVLLTSIETLLSTVDHLCKLREKFS PGAYKDGDIVLGGFLSLHLRTAPNY  
NSFRSQSPVRCLHFSQRGLRLAQT MVFSIEEINRNDEL LPNITLGYKILDSCGTPSEGL  
KGALKLLNEEDQPVS NYACAGFPSVPVIIGDGGSSQS VVVSRMVAPFSVGMISYFSSC  
TCLSDKHEFPTFFRTIPSDAVQIKALVRLVQHFKWTWVG VVAQDNDYGRFGMMAFI  
EEIAKFETCVAFIEFISPVGLSERLPQVVERIKTSSAKVIII FCAERFTAALVKEFILHNVT  
GIQLIASEAWITSVQLWTADTLKILSGTIGFIRRV EIPGLREFLVKLHPSTEPHNPFVEE  
LWREVF GCSVKISNQT LVGTLSSASFEPCTGSENLEATETTYADVSEL RGSYNVYKAV  
YAVAHALHNLQLCENGKGP FANKTCGGKSNIVPWQLLHYIKEVKFINHFGEEVSFDK



NGDPVASYDLINWQQGADGTVQFVEVGYDYDAALPPGKELQMDKNRIIWHQGNNIAP  
VSVCSKSCFAGTRKAAQKGQPICCFDCVPCAEGTISNQTXXGGVGGGGADSCFLIFNAI  
TSNLELNFRLFSLVLFFLYSILFIGQQPSWSCMTSHTIIGVNFVLRIFIY-

>Sc-V2R11\_sf12477

MSLHSIWSVLLLIPIQMVDVDFVDETCELREMFNPGMIQDGDVILGGLFPIHLRTAPDYY  
LFRSKPQPMRCVEFSQSGLRWALTMVFAIEEINGNPELLPDTTLGYKIFDSCGAPSEGL  
KGAFKLLKGDRIISNSTCAGIPTVSMIVGDGGSSQSVAVSRVVPFAIGMVSYFASC  
ACLSDKREFPTFFRTIPSDTIQMRALIRIIHYFKWSWIGAVAEDNDYGRFGMRALIEEA  
AKFEICIA YIEFLSPGRTRERMQQVANTIRKSSAKVLIIFCGESDSLVLNLRMQNITDI  
QLIASEAWVTSFQLWTAETWDILTGTMGFGIRRAEIAGLREFLVNLHPSTATDNPFVE  
ELWREIFGCSVHISNQTLLGGNITASSYRPTGLENLGTIESTFTDVSQLRISYNYKAV  
YAAAHALHNLQTCEHGKGPFPNKTGQKSNPLSWQLLQYLREVRFTNQFGEEVSFD  
EDGDPIASYDLINWQKLPDLSVDFVVKVGYDYDAAMPEGEELALDERRIIWHRTAMEN  
K

>Sc-V2R9\_sf29147

MSLYSIWSVLLLIPIQIVDSFVDETCELREMFNTGMIQDGDVILGGLFAIHLRTAPDYY  
LFRSKPQPMRCVEFSQSGLRWALTMVFAIEEINGNPELLPDTTLGYKIFDSCDTPSEGL  
KGAFKLLKGDRIISNSK CAGIPSVSMIVGDGGSSQSIAVSRVVPFAIGMVSYFASCA  
CLSDKREFPTFFRTIPSDTIQMRALIRIIHYFKWSWIGAVSEDNDYGRFGMRALIEEAA  
KFEICIA YIEFLSPGRTRERMQQVANTIRKSSAKVLIIFCGESDTLSLVNELKMQNITDI  
QLIASEAWVTSFQLWTAETWDILTGTMGFGIRRAKIAGLREFLVKLHPSTATDNPFVE  
ELWREIFGCSVHISNQTLLGGHITASSYRPTGLENLGTIESTFTDVSQLRISYNYKAV  
YAAAHALHNLQTCEHGKSPFSNKTCGRKSNPLSWQLLQYLREVRFTNQFGEEVSFDE  
AGDPIASYDLVNWQKLPDLSVDFVVKVGYDYDAAMPEGEELKLDDSRIIWHRTAMENK  
VPVSACSDNCGAGTRRAARKGQPVCDFCLPCADGEISNQTDSIECIKCPTNDWSNV  
QKNQCIPKEIEFLSFHDTMGITLAAISLFGACITGVVAAVFLYFLNTPIVRANNSELSFL  
LLISLILCFLCSIAFIGQPTPWSCMVRHTVFGVSVFLCISCILSKTLVVLMAFKATLPAS  
NVMKWFGPKQQRSIVFLCTLIQIIICAIWLVTSPFPKNTKYQRAKIILECDVGSVAVAF  
WCVLAYIGLLACMCLILAFGLRALPDKFNEAKFITFSMLIFFAVWFTFIPTYVSNPGKY  
TVAVEIFAILASSFGLLTCIFSPKCYIILFRSEENTKKHLMGKNAQP-

>Sc-V2R21\_sf25216

MPHLLQCVVCVAFPLL GAGDSTCKLFGFHLPLGSEDGDIIGGVFPIYNKELEGNNSE  
KTTPARSECVSFDLRAFRWTQVMIFAIKEINQD TTILPNVTLGYRIHDS CASPSQALKA  
AL TLMNGQEKHIPEFNCKADSPIPAIGESGSSQSITIARA VASFGISMVSYFSTCACLSN  
KQEYPTFFRTVPSDLFQAKALAVLVEHFGWTWIGTIGGDNEYGRYGIQAFRELVEQA  
GVCIAFSEIVLR TYPQERILKIVDVIKLSTAKVILAFASEGDLYPLLKEIVHQNITGIQWI  
ASEAWITATRPSTKHNFKSLGGTIGFASHKMAIPELKHFLMSLRPTAYSTGGFVNAFW  
EAVFGCTFNRGISVLSTKQCTGHENLLKANDSFFDVTQLRVSYNYKAVY AIAHGLH  
SLLFCEDESMGPYLCANVSNIPWQLFQHLKEVRFTNRLGEHVYFDPNGDPTASYDII  
NWQENQNGLVEHVTVGYFDASAATGKQFMINEDSVVWHGNKTRVPQSVCSSECPP  
GTRKAVQNGQHICCFDCIPCAEGEISNTTDSLECLKCPLYWPSDDSQRCPKEVEFL

SFEDTMGIILMTFALFGACITLIIASVFLYRKDTPIVKANNSELSFLLLFSVLVLCFLCSLT  
FMGKPSVWSCVLRHTLFSITFVLCSSILAKTIVVLLAFKATVPQNNPMKWFGPLQQR  
LIVCACTFIQILICVTWLVIAPPFPTKYLQYHNAKVILECNVGSPIAFYCVLGYIGILSCL  
CFVLAFLARKLPGNFNEAKLITFSMLIFCAVWLTIFPAYVSSPGKYTVAVEIFAILSSSF  
GLLFCIFGPKCYIILFRPEKNTKRNLGMGIPSKKL-

>Sc-V2R7\_sf54760

MRS LAIW TLLFLLSLTKLSLEIQPTCKQRERFNSGVSQNGDIVLGGLFPIHFGTTPDEN  
TFRSKPQPMRCFLLRQREL R WVQTMIFAIEEINRNPKLLPNVTLGYKIFDSCHTHSDSL  
KGTLKLLNEEDET ESSYRCAATPIVPIIVGDASSQSIAASRLLAPFNIGLVSYASSCTC  
LSDKREFPTFFRTIPSDGVQVKALVKL VQRFKWIWVGIVTEDSEYGRFAISFIEEVSKF  
ETCIAFIEFMSPESTRIKLLGV IETIKKSTAKVVIIFSLEHATKSLAIELRRHNITDIQLIA  
SEAWITSVRLWTKETQEIFSGTIGFGIRRAEIPRLREFLVKLHPSRTPDNPFLEELWRDV  
FGCRVKFSNQSLEKETS PYK PCTGLESLETIQNAYTDVSQLRISHNVYKAVY AIAHAL  
HNLKSCENGKGPFINMTCGQGS RILPWQLLHYLKEIRFTTQFGEEVSFDKNGDPVASY  
DVINWQQGVDGSVQFVNVGYDAALPEGEEFVLNESRIVWHGSQNRVPISICSGICP  
VGTRKGARKGQPICCFDCLPCSEGEISNQTDSSECTKCPRDYWSNKARNQCIPKEIEFL  
SFHSTMGIALVAISLFGACITGVVA AVFLYFLNTPIVRANNSELSFLLLISLILCFLCSIA  
FIGQPTPWSCMVRHTVFGVSVFLCISCILSKTLVVLMAFKATLPASNVMK

>Sc-V2R15\_sf63087

MYYLLLWGYFSLPRRGTSQSVCQLRENFNLPRLYEDGHLIMGGIFHFHYHLEQQLE  
PPSFTA KPKSPKCENFNLKEFH LAQTMIFAIHEINSNP KLLPNITLGYKIYDACSNEAQS  
VKAVMALISAQDKSISDSSCTVTSKVPVIFADAGFIRSLAETLLTGPFGIPTXXXXXXXX  
XXXXXXXXSISCLKCPPEYWSNRLKTQCVPKRIEFLSFDDAMGSSLMALALIGACTLVAT  
SLIFYKHRQTPLVKANNSELSFLLL FAL TLCFLCSLAFVDQPSEWSCMLRHTVFSITFV  
LCLSCILGKTLVVLMAFKTRLPNNKNIKWFSRLHQRLNVCALTVVQAIICIIWLTTTPP  
FPVNSTKYKTIILECNFGSLVYFCCVFSYIGALACCCALAF LARKLPDNFNEATFIT  
FSMLIFCAVWITFIPAYVSSPGKYTVAVEVFAILASSYSLLFCIFAPKCYIILLQPEKNTK  
KYL MRRSNAK-

>Sc-V2R29\_sf84419

MFHLFLCCFLLQLLAPVVSTNSPTCQRWGTDDLLGSSKDG DILLGGIFSVHASVESQD  
ISFEMQPKAIKCKTFRHRLFRFVMAMVFAIEEINNDPELLPNVTLGYRIYDSCGNPPI  
KAAFDLNLRLGKVASNVPCERAPDISAIGDSGSSQSLAIANLISTFRIPMVSYVSTCVC  
LSNRIEYPSFFRTIPSDYFQV RALAQLVAHFGWTWIGTIKSDDDYGNFGMQAFREIVR  
RSGVCIAFSESFHKTYSEEKLLKAIYTIKTSSTRVVVAFLSQSDMAILLREIARQNITGV  
QWVGSEAWITTSPLPPGQSRLFVSGAIGVAIRKVS LPLGKEFLMQVHPAVYPGNPFVK  
EFWERTFNCTLEKMGNRTSGTEADSVTQACTSKENLQTAHNTFTDVTEYRVTYNVY  
KXKLG PASLTVMHYLR TALIFLLY LKTVKFITKIGEMVHFDENGDPVPTYDIVNWQ  
PNALGGTKIVTVGYDGSALPGQEFVISEXXXXXXXXSTECIRCPLYRSNRQRDECILK  
EIQFLSFEETMG IILVTLALFGACISTGVFVTFYLHRHTPIVKANNSELSFLLL LAL TLCF  
LCSITFIGEPSSWSCALRHIAFGITFVLCIACVLGKTIVVMAFNATLPNSNL MKWFGP  
TQQLTVLILTLVQSLICVAWLTISPPYPEKNSDYFHEIIVFECNVGSTIGFYCVLGYIG

FLSCVCFVAAFLARKLPDNFNEAKHITFSMLIFCAVWITFIPAYVSSPGKYTVAVEIFAI  
LSSSSGLLICIFAPKCYIILLREELNTRKCLMG-

>Sc-V2R2b\_sf17803

ISYFSSIPRLSDKGEFSPFFRTMPTDMFQSKVFVLLVKHFGWKVVGILADDIDYGIQA  
AQIFREEVESLGVCVAFSETIPIGKSREKYLQVVDIIRMSSAKIIVAFSCDTNIVPLLEEI  
VRQNITNRTWLASEGWSTSGPLFIIKKEHTKFWTGTMGLTLPLCDIEGLQEFLYQKHP  
LKA VHDIFMPELWEEVFSCSWSIAIQKENKLPSNMSQSALKEICTGMEDMRAADHSY  
TDDSNFRVSCNVNNAVYAVAYALHDLQACENXXLLHYMKKVRFIDQSGNERFYFDE  
NGDVSATYDIINWQVTADGIIKFVKVGRYDARAPPGHELTIREQDLIWNAGESE

>Sc-V2RL1\_sf38988

CSSLMFRYDVRGLVKAIALIYSIEMVNNSTLLPGIKLGYEIIDTCTEPTKALKATLRF  
SVFNSTDNCVKVQCNYADYQPAVKA VIGAGTSEVSIAVARLLNIQLIPQVTMFSSISY  
SASAKILSDKARFPAFLRTIPSDDYQTKAMVKMVQRFQWNWVGTIASDDEYSRSGID  
NFITQAESLGICIAFQEVIPFYSSIQVTNSRINEIANMVINRTKVNIVIFGKSTHVIELFK  
ILGTHNISKVWIASDSWSTNSNITHLEGIENIGDIVGFTFKSGNLYKFQNYIKKLPVNRT  
NVNTFLNKYYRLRALCANVENDEVETCISNYRHVDAKRYNVSNTAIQYQEDDFLVN  
NIEPGVISSIQWSVTALAHALRNLLKCNEGTCRKTDFDFAPWKVNHYFQLLEELKKVN  
VTDEGTKIQFDPSGNFISGYDIVMWK

>Sc-V2RL4\_sf38213

FDVHRFIWLQAMIHTIEMTNNSTLLPGIKLGYEIIDTCTDVSTAVTASMKLLSKVNIS  
DNCLEVRCNYTDYQPIVKVVVGEIFSELSISTARIFNVALMPQVQISPASSAAILSDKLR  
FPSLIRTVPSDIHQTKALARFVSNRWNWIGVIATDDDYGKSAMADFLSNAHDLDCI  
GFQELISIFAAGESNDEAIQALVSKIETIPTANVIVLFAKPAVVIKLLGEIIKRNITRVVW  
ASDAWTISGAVSTMQNIKVGNVFGFSFKNGNIPGFNEHLRNPRSGPGAFNKFIEKYK  
QLRFTCSAEYLNKYTKMCNSGLKDCPLPDSLKLV SPLACNKTNESIADFDDDYLVQNV  
ERAGTYATYLA VKSIAHALRNLLKCQGGVCQKTPNFAPWEV

>Sc-V2RL5\_sf82161

DDFFYSTADMNCLKCSDEQWSDSGSSTCNDRTTEFFSWNNGFAILVVFASLGIIILII  
VIAIIFRQKLNTPV LK SIGGPF CYVILL SLLSFASTGFFIGEPTS YGCYIRQPLFGISFTIC  
VSWILIKSFKIILAFKFDPVNRKKMMSLFPVAILVTCNLIQVMICALWLT LN GPHPVK  
SYDTPKIILLKCEEGSNVAFGVMLGYIAVLAMFCFLAFMGRKLPDIYNEARFITFSM  
LIYLIVWISFVPAYVNTDDQYLPAVEVVAILASNYGILCCHFFPKCYMICFKKDSCTRE  
VFIQTL

>Sc-V2RL3\_sf8910

ISYASSAETLSDKARFGSFLRTVPNDNHQTYAMAKLLENFNWNWVGAIASEDAYGR  
AALNSFISHAARLNICVDFHELIPHGNEQRYAKINATAEKIMKSTANVVIVFARRADII  
KLFTILIEQNVTKIWIASDSWSNARQVARIKHIEKIGTILGFTFKSGNIPNFNGYLKCLK  
THPQDDNKLTKDYIRFINKSGTNEPTWNDSNSKQNKTLTYDQIIESTTYGVYLAIRAIV  
HALQRVLNCTQRNCDLNFNFPWQVTD SNKCEKCEDQWSEVGSTICKNKTVEFLR

WRDAISVVLIIIFALLGLLIICMIITLFTKYLGTPAVKAAGGWMCYIMLPSLVLGLVSAIL  
FIGEPFNWVCIRQPLFGISFTLCVSCILVKSFRILAFSFPNTIHRRLKSAYKVPPIIIIVTT  
GIQVAICSMWLA FNIPKASQNRNIPQIILLSCNEGSYVAFV MLGYIAFLACVCFIFAF  
KGRKAPERFNEAKFITFSMLVYLIVWISFAVYINLEVS NKYFPVTESIAILASIYSILCC  
HFFPACHIICFKKESNRESNYLS

>Sc-V2R31\_sf296289

FSYSAA YDYLNNMYEFPTFFRTIPNDYHQVDGLAQLVKYFGWNWIGTIRSNSTYGAL  
AMDEIIKSMHSFGICIAFSGAVHKTD SKEKLLSLINVIKQATTRIIVAFVAQADMAVLM  
QEIVQQNLTGIQWIGSES WITMPGISPKETSFLAGTLGFAVPKATL PGLKEFLLEVHP  
SRYPGNV FVAEFWETTFECSWQKPENLSRADGSQVNLCTGQEKLEEV DNQYTDTSQ  
LRIAYNVYKAVY AIAHSLNHMLSKTNFTFSELDLWE

>Sc-V2R18\_sf890433

KKEFPTFFRTIPSDYFQVA AFVQLVEHFGWTWLA AFGSDDDYGH LGITTFVEEVTKT  
GACVAFTEYLPKFNDKEKILHQVELIKNSNVK VILVFAAERDLNFLVEELVRQNVTGL  
QWLASESWSTA ALLSTAANSEIFGGTLGLAIRRGDIPGIKQFLVRLHPSNYPGNEYIKQ  
LWETVFHCTWTSHNDTENARLGPLKHVCTGQENLKVAQNAFTDETQLRVSYN

>Sc-V2R2a\_sf209424

CFQCPEDYWSNKKKDKCVPKEVEFLSFHEPLGGVLLFFSILGIIISVAIIVIFIKFMNTP  
IVRANNYELSFLLLFSLTLCFLTALIFIGKPSVKFCVLRQIGFGTSFSLSLSCILVKTIV  
VVLAFTMTTPHQ NVLKRFRPMHRLIVA AITLIQISICVGLLLSSSL SVEKNTMAVVG  
KIILECSNGSEHALFGNLGYVGLLALLCFVLAFLARKLPNNFNEAKFITFSLLIFFAVWI  
SFLPAYFSTKGKYLVAIEIFAILSSSFGLLACIFFPKCYV VLLRPELNSKRGLMGRAPLT  
GESNLKT-

>Sc-V2R20\_sf279449

YLPKFNDKEKILHQVELIKNSNVK VILVFAPEIDLNFLVEELVRQNVTGLQWLASEGW  
STAALLSTAANSEIMGGTLGLAIRRADIPGIKQFLVRLHPSTYPGNEYIKQLWETVFHC  
TWTSHNDTENARLGPLKHVCTGQEDLKVAQNAFTDETQLRVSYNTYRAVYAVAHSI  
HNMLQCKKGQGPVNETCPDISKLPWQ

>Sc-V2R30\_sf128484

ISFSATCQCFGELEFATL FETIPND SHQIIAITS LVKYFGWNWVGLIQSTSTAMALES DT  
IFQEFRSAGICIAFREAFSETDSRERIQQVVNSIKQSPTKIIIFATLADMEVLLLEVFR  
QNVTGIQWIGS QSWSIRNLF PQLNARFLLGALGFVVPKANIPGLKEFL LQVNPQSPG  
NPFVNEFWEKTFHCSMQNVTGCNPTVQQCTGNEHLQD VDNLYTDTTQLRIS SHVYK  
AVYIIAHALHN VFSCGNNSCPKWSDDKTWQ

>Sc-V2R16\_sf81243

ARFCTKCPLEYWPNQYRNECLPKEIEYLSFQDRIGATLTSFSVGGACLTITTA VVFLK  
HRHTPLVRANSELSFLMLLALLCFLSALLFSAHPTQWSCTLRFTMFSVTVALCLSA  
ILGKTIVILLAFKTVS QSTKLVKWFNPRRHRTGVLVLTSIQCIICILWITHSPYPFKSF  
AYYPHIISLE CQIGSVAYFCAIFVYIFLLAGVTLTAAYFARQLPDSFNEATHVTFSLLVF

LVVWITFFPVYMSAPEKYAAAVHAFAILASSFGFLLCIFAPKCYIILLKPEANTRKNLM  
KFSSK

>Sc-V2R28\_sf585634

TIKTSSTRVVVAFLSQTDMAILLREIARQNITGVQWVGSEAWITTSPLPPGQSRQFVSG  
AIGVAIRKVSPLGLIEFLMQVHPSVYPGNPFVKEFWERTFNCTLEKIGNRTTGTEADS  
VTQACTSKENLQAAHNTFTDVTEYRVTYNVYKATYAIAHALHNMLSCEIGKGPFFYN  
NSCADISSFPWQLLHLYLKTVKFITKIGETVYFDENGDPVPTYDIVNWQPNALGGTKI  
VTVGYDGSAL

>Sc-V2R8\_sf78664

SLECLICPLQDWSNERRDQCIPKYVEFLSFYDTMGITLTAVSLFGTCITGVVAAVFLYS  
LNTPIVRANSELSFLLLISLILCFLCSIAFIGQPTPWSCMVRHTVFGVSVFLCISCVLSK  
TLVVLMAFKATLPASNVMKWFGPKQQRSIVFLCTLIQIIICAIWLVTSPPLPSKNTKYQ  
SAKIILECDVGSTVAFCCVFGYIGFLAGICFLLAFLARALPDKFNEAKFITFSMLIFFAV  
WVTFIPAYISTPGKYTVAVEIFAILASSFGLLICIFAPKCFIILLRPEENSKKRLMAK-

>Sc-V2R22\_sf137043

IPHAICTEPCPPGTRKVNRRKGQPICCFDCAQCADGEISNTTDCLKCPLYWWSNQQKDR  
CVLKKIEFLSFGEILGYVLVALALVGVGFTLATAAIFQYRETPIVRANSELSFLLL  
GLMLCFLCSLTFIGEPTGWSCMLRRTAFGIVFVLSISCILGKTILVVI AFKATLPSNNLM  
SWFGPMQQRLGVFVLTFLQALICTIWLVSPPYPLKNMTY YRDIILECDVGSLKAFYF  
VSCYIGLLSTVCFVLAFLARKLPDNFNDAKYITFSMLIFCAVWITFIPAYVSSPGKYTV  
AVEVF AIWASSFGLLVCIFAPKCYIILLKPEDNTKKNMMGK-

>Sc-V2R35b\_sf155811

VPLAVCSESCPLGTRKFVRKGGQPICCFDCTSCSEGEISNITDSIDCIKCPVEYWPNVSRD  
KCVPKGIEFLSYTEILGIVLTTLALAGICALAIIVFVKYKDTPIVKANSELSFLLLF  
AIALCFLCSLTFIQPTLWSCMLRRTAFGISFVLCISCILVKTIIVLMVFKTRIPNQSM  
KRFQAKQQRLSVFVLTFIQGLISALWLVIAPPFPMKNTRYKDVLECDTGSVTA  
FYLVSVYIGTLSCVCFVLAFLARKLPDNFNDAKYITFSMLIFCAVWIAFIPAYASSPGKYT  
TASEIFAILTSNFGLLLCIFVPKCYVLLKPENNTKKFLMGKEPSKKL-

>ScV2R25\_sf380574

VSYLSTCECLSNRKKYPSFFRTIPSDYFQAKALAVKHFGWTWIGTIRSDDDDYGNFG  
MQAFTEAVQQLGVCIAFSETFHAIYPRDKLRKTIAIKKSSTKVVLAFQAQSDMEVLI  
KEIIRQNVGTGIQWIGSEAWAATLVVPAESKRFLSGTIGIAIRKVDIRGLKQFLMQVHP  
SLYPGNLLVKEFWETTFGCILNNRGNKTDGTPSPDPIHECTGREDLQTVHNSFTDVSQ  
YRVEYNVYKATYAIAHALHNMLSCKSRTELSNNSCTKDLNFEPWQ

>ScV2R35a\_sf297668

VSYFSTCLCLSNRKEYPTFYRTIPSDYHQSRALALLVQRFGWTWIGAIRSNNDYGN  
NSGMKEFIEAALNFGICIAFSESFYRTDSVEKISKIVQVIKASSTKV VVAFASPGDMRVLFD  
EVL RQDLTG VQWIGSEAWITADVLAPDKSSRFLTGAIGTNVRAVEVPGLRDFLLRIHP

SMFPGDSFVTEFWENTFRCSLTMDGNRRMASSSPHPPCTGNETLFEMHDVYTDPTL  
DGSSNNVYKAVYTFahalHRMFSCeKHKGPFQSNtCAHFSNFESWQ

>Cm-V2RL5\_SINCAMP00000024414\_858 24667 SINCAMG00000015837

CECCVLFLYCIHLSLGNPCVVPNDVVGAKDPGDIIILGGVFAVHQQVKGLSNRSRPEP  
LPCTGFDIEGFLRAEAMMYTIQLINNSTLLPGIKLGYEYDTCADTSRALTASMRFLST  
ANSSGTCLDVQCNYTNYQPIVKA VVGEGYSEL SISIARIFNLFLMPQVSYASSAEILSD  
KVRFPSCRTVPSDIHQTEALARL VSNFHWNVIGIATDDDDYGQSAMASFVEKAQKL  
NICFGLKELIPTYIGDKTTDDKIQA VVSKIKNTPNANVIVIFAKIPLIKLFTQVMEHNVT  
RTWIATDVWSTSRE VSSMMNIQKIGK VFGTSFKNGNIPGFLEHLKCLR AAPGTMNRF  
LEEYRQLRFNCSDEYFRYNETCNSNSHQCTLPNSLKL SPLACTKRNESFTEIDDDFLV  
RNAEMSGTYATYLA VRTIAYAIKKVLKCEGTCQRTFSFAPWQLLEELRKVKFPEMG  
KDFYFNRFGDSMNGYDLINWEVANGTTKFTIIGNYDIMDKKIYIYNPDFSRILKKIFSK  
CSQSCKPGQWKIQNNTLPSCCYECANCSEGFYSKHWD TNTCFKCLDNQWSPHGSSK  
CFDRKTEFFRWSNGFAIVLL VFAFLGILLIIVTIIIFILNRSTPVVKAAGGSLCYLILVSLI  
LSFASTGFFIGLPEKFTCIIRQPLFGISFTVCVSWILIKSFRINLAFKFDPPVHKQMKKLY  
KPTLILICTGIQVIICSIWLGIKPPRLSESYDKSRIILLQCDEGSNVAFGVMLGYIAVLAT  
FCFLLAFRGRKLP GAYNEARFITFSMLIYLIVWVSVFPVYLNTQGQYLPAVEMVAILA  
SNYGILCCHFFPKCYIICFKKESNTAEEYMKNV

>Cm-V2RL2\_SINCAMP00000020270\_873 20473 SINCAMG00000013232

MTLLVALAVLCTLSFNNTQSCSKIPDDLKGAKAPGDIIGGLFPVHEKVENLVDLKRPV  
NQNKGFVDVRGFRVTLAMIHSIEMVNNSTLLPGVKLGYEYDTCAEATVAMRAALR  
FLSNSSSNCVQVQCNYTDYLPVKA VVGSSLSEVSIAVARILSLYLMPQISYSSSAEILS  
DKTRFPAFLRTIPSDYYQTKAMAKLVHISQWNWVGTISSDDDDYGRSGIDNFIADAEN  
LGVCIAFREVIPISSDKVTNDRIKRIVNTVNVNQSSVNVIIVFAKGS HVINLFKELSVHN  
VNKTWIASDSWSTNRNVTHLETIHKIGNIVGFTFKSRNLSKFENYVKTL PINSAAAGNT  
FLEDYHWLRSICADIQNNELET CISNLTQNPKFIRHSHKHNKLTNRRSWEDDFLVNNIEP  
GFISSIHWSVIALAHALRNLLKCNEERCQKS FDFAPWMLLEELKKVNFDTDEKQFQFDS  
SGEFISGYDIVMWKS VNGKMEFNHTVAEYNIQEDNFTIKDARFKILKKITSECSKHCCQ  
PGEIKQSSQGQHTCCYNCVRCNNNTFSNTTDAQMC FVCLEDEWAPIKSAKCYKKVFS  
FLDWTGDGFAIVLLAFAAFGIVLII VIAVIFIKYMDTPSVKANGGVMCFIMLFSLLCSFAS  
VGFFIGTPTKITCKIRQPLFGISFALCVSCALTKSFKILLAFNFPNPAEQENLKH FYKPWA  
IKGICTGLQIVICTMWLVFDGPQPHKESKRFPKEILLECNEGSYAAFVMLGYIAFLSL  
ICFMFAFKSRKLPENYNEAKFITFSMLIYFISWVTFVPVYVTTQ GKYLPAVEMVITLSS  
TYGILGCHFFPKCYIILFKKELNTTSSFLKNLYDYSLKSVTVITNSPISVNYSS

>Cm-V2R10\_SINCAMP00000010763\_834 10869 SINCAMG00000007046

MSCLPLLLFLIPLNDGAERSTCSYGGFRDLSELFMKGDIILNGLFPIHFRMNKSNLTYR  
LSPGSPLCDGFNLSFRWAQTMIFALHEINSDLM LLPNITLGYEYDTCCTTPAQLSRAA  
LTLARHKEDASDGNCMETSSNSVIVGDSGSTQSIVVAKTLGPLHIPMVSYFSSCSCLS  
NREEFFA PFRRTIPSDTFQARAVVRLVQRFGWTWVGSVAGDDDDYGRYGTQAFTDEVK  
KLGVCIAFTELIPKVYSRERILQITETIKRSTARVIVMFALEGDAYPLIKEVVQQNITGH  
QWIASEAWVTSSLMATAEHLPALDGTIGFAIPRAEIPGLRDFLLQVDPFKSPENGLVK  
ELWETMFKCSFNLKSDILRISYNVYKAVYAFahalHNL YSCANNNDPFDNKTCANII

DFKPWQLMHYLRVRFSTKLGEEIYFDENGDPVATYDLVNWQQEDAGQVSFVPG  
HFNGAPNSGQDLVVNETAIVWNGGKAEVPQSLCSVSCRPGTRKAAQEGRETCCFDC  
VPCAEGQVTSADVDSINCPEDSWSNLQRNKCIPKELEFLSFAEPLGLMLTTGSALGA  
LSTIIVAAVLLYHRDTPIVRANNSKLSFLLLFSLTFCFLCSLTVMGQPSTWTCMLRHTL  
FGVSFVLCISCVLGKTLVVLIAFKATLPNSNVKWLGTLQQVLSVFSCTLIQVIICVV  
WLLVSPPSAARNVEYSSEKILLECNLGSVSAFCCVLGYIGFLSCMSFVLAFLARKLPD  
QFNEAKLITFSMLVFGAVWLAFIPAYVSSPGKYTVAVEIFAILSSSFALLICIFAPKCYV  
ILLKPHKNTRKHLMDKTC PQKS

>Cm-V2R18\_SINCAMP00000025049\_864 25303 SINCAMG00000016243

TPIVKANSELSFLLLFALALCFLCSTTCKHWGMFDLLSLSKGDIVLGGVFSIHVDV  
EDQDINFKSQPKAVTCTKFRLRQFRLAMAMIFAIEEINKDLTLLPNITLGYWISDACGT  
PAVSIKTTFEFLNRLEGISSDFTCKRAPVVSIVGHSSSSLSIAVATLISPFGIPLVSYFAT  
CQCLSNRKEYPSFFRTIPSDYFQVRLAQLVKHFGWTWIGTIRSDDDYGNFGIQAFTE  
TQQLGVCIAYSESFYLTYSREELLKTIDIKKSTTKVVVAFLGHSDMTALLKEIVRQNV  
TGIQWIGSEAWVTTTHLPPEESRFLSGTIGIAIRKVHVPGLKEFLLRHPSAYPGNRLI  
KEFWEMTFNCTLRNEEHKADGIKECTGRENLRVTNNAAYTDVSQYRVTNKVYTATY  
AIAHALHDMLSCESGKGPFYNKSCANISNFQPWQILHYMKTLNFNTKIGENVHFDEN  
GDPVPTYDIINWQPNGLGGTDIITVGHYDGSALPGEELNIKEEAVVWRGGQITVPRAV  
CSDSCLPGTRKAARNGQPKCCFDCIECADGEISNITDSTLCFKCPLEYSNDKRDHCIL  
KEIEFLSFEETLGIALVTLALLGVCITISVFVAFYIHRDTPIVKANSELSFLLLFALALC  
FLCSVTFIGEPSVWSCRLRHTAFGITFVLCISCVLGKTIVVMAFNATLPNSNMMKWF  
GPTQQRLSVFILTLIQCLICTVWLCLAPPYPLKNSEYFRERIVFECHLGSAAVAFYCVLG  
YIGLLSCVCFGVAFLARRLPDNFNEAKHITFSMLIFCAVWITFIPAYVSSPGKYTVAVE  
IFAILASSFGLIVCIFAPKCYIILLKKEENTKEHMMGK VAF

>Cm-V2R7\_SINCAMP00000007328\_873 07407 SINCAMG00000004775

KLIKTISLGIPLINNSYGCLLLITSVLGEGKATCILRGDFNLPGLLQDGDVDIGGLFPMH  
YRAGVTDLAYQHKLTVPTCQSDFRGRFRWAQTMIFAIEEINKDLSLLPNITLGYKIYD  
SCATHVQALRSTLTILSGPEVIESDEKCPKDVSMPIIGDSGSSQSLVVARTIGPFRIPM  
VSYFSTCSCLSNRREFPTFFRTIPNDDYQVKAIVQLVKHFGWTWVAASEDDDYGRFG  
IQALTEELEKLGVCMAFYEMIPKVYSHDRILHIVERIKMSSAKVIVAFSGDGEIFPLMQ  
EIVKQNTGVQWIASEAWITPLFSPSLFYDTLGGTIGFAIRRADIPELKEFLTLHPSLF  
PGNALVKEFWETLFSCSFD MIDNTPQQANATQPQCSGLENIDADYNMYS DVTQLRIS  
YNVYKAVY AIAHSLHSLILCENGAGPFENKTCGNISHLKPWQLQYYLQEVSF TDSL  
EVVDFDENGDP IASYDIINWKQGADGSVQFVTVGHYDASEGSGHKLVLKEEDIWNR  
GQNKVPQSMCTISCPPGTRKGVREGEPICCFDCLPCDDGEISNQTDSIKCTKCPLDFWS  
NHERVQCIPKEIEYLSYEETMGIMLTVIALCGACITKAVAAIFFCYRKTIVVRANSEL  
SFYLLFSLTLCFLCSVFIGKPTHWSCMIRHTAFAISFTLCISCVLAKTVVVLIVFKATL  
PNNNTLKWFGPLQQRAGIFISVSVQVLICIIWL VSSPPFP SKNTQVSN AKNILECDVGS  
VVDFCCVFGYIGFLSAMCFILAF LARKLPDNFNEAKYITFSMLIFFVWIAFIPAYVSSP  
GKYTVAVEIFPILSSSLGMLICIFAPKCYILLK PETNTKKHLMGRESL



>Cm-V2R11\_SINCAMP00000025051\_866 25305 SINCAMG00000016247

HLLFGAFLLSFCFPLLGM EAPLCKQWRVHDLPGISKDADIILGGIFSVHYNAETQEDLT  
FRTEPKPVKCKIFDFRSFRFAQAMIFAIEEINKAQ TLLPNVTLGYRIFDSCGMPSLSMK  
AALDILTTHEESPSNYTCNRNSVLSAIVADSGSSQSVAVARSIGPFRIPMVSYFATCEC  
LSNRREFASFRTIPSDYFQARALAQLVKHFGWTWIGTIKSDNDYGNFGMQTFTETV  
QQFGVCIASFSEFRIYPREALLKTIDVIKKSATKVIVAFVSLGDMAVLIKEIAQQNITGI  
QWVGSEAWVSTSLLSPEENRRILTGTIGTAIHKVVL PGLKTFLTHLRPSSYPNNILMKE  
FWETAFCSTLSMTDNETENVTSVSRNKECTGKEHLSTINNIFTDVSALRV TYSVYKAT  
YAIHALHDMLSCEYGKGP FANKTCANILHFEPWQLLFYMQTVNFTTKIGERVYFDE  
NGDSVPTYDIVNWQPNNHGGADVLTIGYYDGSEPSDQQLMIKKGTMVWSSGGQSKA  
PRAVCSESLPGTRRAARKGHPICCYDCVQCADGEISNNIDSLDCITCPSEFWSNQQR  
DQCLPKKIEFLSFGDVMGIFLAIIVFGACLTIGISALFY YKDTPIVKANSELSFLLL  
ALTLCFLCSLAFIGEPSVWSCMLRHTLFGITFVLCISCILGKTFVVLMAFRATVPSNNI  
MKWFGPTQQLLTILITFVQCLICIVWLAI SPPFPVRNTKYLKEIILECDVGSVTA FYS  
VLGYLGFLSCVCFVVAFLARKLPDNFNEAKCITFSMLIFCAVWITFIPAYISSPGKYTV  
AVEVFAILASSSGLLLSIFAPKCYIIIRKPEKNTKKHMMGKKPSNK

>Cm-V2R8\_SINCAMP00000005442\_861 05506 SINCAMG00000003537

LFQRFTMLCSLSFHFTFFLVNSVLVKADNVCELLGKFNLPALVADSDITIGGLFPIHFR  
VIEPNLSFQAAPELSRCEGLNFRAFRWVQTMIFTIDEINRDPRLLPNITLGYRIFDSCDT  
HFQALRAALTINNGQEASVTDYDCAPSMYAVIGDSGSTQSIVVTRLLGLFGIPLVS YF  
STCACLSDKQEYPTFLRTVPSDYYQV RALAQLVKYFGWTWVGTIAGDDDYGHYGIQ  
MFSEQVKTFGVCIASFSEIIPKVN S KKKVVEIVEMIEKSRAKVILVFAVEQDMELIVKEA  
IRQNITGVQWIASEAWVTSALLSSQDNSILIGTLGFALRRAEISGLQEFLHKVHPFKAP  
QNPIVTEFWETLFHCYLGNDTSQSKPSCTGLEDLKTHENIYSDVSQLRVSYSVYKGVY  
AVAHALHHLFACQPGQELIVNDTCPNTVNIEPWQLLHHLKRIKFTDSFGNEILFDPNG  
DPIPSYDLLNWQRKVDSSTQYETVGRYGSALGSYHELHVYGGQSIVWNSGKKKVPQS  
LCSVNCLSGTRKAAREGQPICCFDCIPCADGEISNTTDSVQCICDLDYWSNSQNNQC  
ILKEIEFLSFGDAIGISLATIALLTITIAAVFTHYRTTPVVRANSELSFLILFSLAL  
CFMCSLIFIGQPSVWSCSLCNTLSGVSFALCVSCILAKTIVVLMFAFKATGPNTNTMKW  
FGPMQQRAFILLCTCIQISICVSWLITSPPLPVKN TTYQSGKIILECAIGSVKAFVVLG  
YVFLSSLCLVLA YFARKLPDNFNEAKFITFSMLIFFAVWITFIPAYVSTPGKYTVAVE  
IFAILSSSFGLLLCIFAPKCYIILFKPERNTKKHLMGTMIT

>Cm-V2R16\_SINCAMP00000025045\_813 25299 SINCAMG00000016242

KDGDIVLGGVFSIHVDVEDQDMDFKSQPKAVTCTKFRFRLFRLAMAMIFAIEEINKDP  
SLLPNITLGYWISDSCGMPSVSIKTTIEFLNRLEETSSDFTCKRAPVVS AIVGDTISLSA  
AIATLIAPFRIPMVSYFATCECLSNRKA YPSFFRTIPSDYFQV RALAQLVKHFGWKWIG  
TIRNDDDYGNIGMQAFTEAVQQLDVCIAFSESFHLTYSQQELHNTVDI IKKSTTKVVI  
AFLGHSQMTALLKEIVRQNV TGIQWIGSEAWVTTTHLSPEESRQFLSGTIGIAIRKVHL  
PGLREFLLRVHPSAYPGSRLIKEFWEMTFNCTLRNEEHKADGIKECTGRENLQTVHNT  
YTDVSQYRISYKVY TATYALAHALQDMLSCESGKGPFSNKSCANLSNFQPWQIFHY  
MKMVNFITKIGEYVHFDENGDPVAMYDIINWQPNDLDGTDVATIGHYDGSAPPGE EF  
KIKEEAIWSSGGRITVPRAVCSDSCLPGTRKATRRGQPKCCFDCIECADGEISNITDST  
VCLKCPLEYRSNDKRDHCILKEIEFLSFEETLGIVPVIIALLGVCITISVFETFYVHRNTPI

VKANNLELSFLLLALCFLCSIAFIGEPSVWSCRLRHTAFGITFVLCISCVLGKTIVV  
VMAFNATLPSNNMMKWFGPTQQRLSVLILTLIQCLICTVWLCLAPPYPLKNSEYFKE  
RIVFECHLGSAAVAFYCVLGYIGLLSGVCFVVAFLARRLPDNFNEAKHITFSMLIFCAV  
WITFIPAYVSSPGKYTVAVEIFAILASSFGLLVCIFAPKCYIILLKKEENT

>Cm-V2R15\_SINCAMP00000025041\_865 25295 SINCAMG00000016237

SKTMYHPLVYVLLFSVLVPVWLTEEPTCKRWGMFDLLSLEDGDIVLGGVFSIHGNV  
KNQEVAFKTQPQAVKCTTFQFRLFRFAMAMIFAIKEINKDQTLNITLGYWISDCG  
MVAMSIKTTDFLNRLEETSTDSTCKRAPVVSAAIGDSSSARSSAIATHISPFRIPLVSYF  
ATCACLANRKEYPSFFRTIPSDYFQVRAALQVVKHFGWTWIGTIRSDDDYGNFGMQA  
FTKAVQQLDVCFIAFSESFHITYTREELFKTINIKKSTTKIVVAFLGQSHMTALLKEIVR  
QNVGTIQWIGSEAWVTTTHLSPEESRRFLSGTIGIAIRKVHVPGLREFLLRVHPSAYPG  
NRLIKEFWEMTFNCTLRNGKHKVDGIKKCTGLEDLRTVNNAAYTDVVSQYRVTYNVYT  
ATYAIHAHALQDLLSCENGGKPFNSKRCANISNFQPWQLLHYMKTVNFNTKIGENVHF  
DENGDPVATYNIINWQPNDLGGTDIITVGHYDGSAPPGEEFKLREETIVWSGGRIMVP  
RAVCSDSCLPGTRKAAKRGQPKCCFDCTECADGQISNITDSTVCLCKPLEYRSNDKR  
DHCILKEIEFLSLEETLGIALVTLALLGVCITISVLVAFYVHRDTPIVKANNSELSFLLL  
ALALCFLCSVTFIGEPSVWSCRLRHTAFGITFVLCISCVLGKTIVVMAFNATLPSNNI  
MKWFGPTQQRLSVFILTLIQCSICTVWLCLAPPYPLKNSEYFRERIVFECHLGSAAVAFY  
CVLGYIGLLSGVCFVVAFLARRLPDNFNEAKHITFSMLIFCAVWITFIPAYVSSPGKYT  
VAVEIFAILASSFGLLVCIFAPKCYIILLKKEENTKKHMMGKMASKK

>Cm-V2R1\_SINCAMP00000025728\_858 25987 SINCAMG00000016659

FRLLVYLAMTVAVSGKSTCKLKGKFNLSFKMPGDVILGGMFPIHHRVKSSNASSST  
TPESVGCCEGFNFRTRWARTMIFAINEINKNNLILPDVQLGYTIYDSCFTISKAVEGTLT  
YLTGQDEAVPNYRCGTGAPLAVLIGAGGSALSATARILGLYYFPQVDYSASCSVLSD  
KFQFPSFLRTIPDNDFQSRAMAKFVMHFGWAWVGTIASDDDYGKYGIKVFKEAVEK  
VGVCISFSETIPKVYARDKIVQIVETIKESTAKIIVVFSADIDLSSLIEEVIRHNISGRTWI  
ASEAWVTSALISKREYSSLEGTIGFIRRADIQGLRDFLTELEPQNNSEKLVTEFWEK  
TFDCISKSIESSEMDAARFCTGKEKLDINNTYSDVSQLRLTYSVYKSVYTVAAHALHN  
MHTCKPGSGPFVNGTCADIQKFEPWQLMYYLKNVRFTSLNGEDIYFDINGDVKAAAY  
DIMNWRSPDGYISYTLVGSYNESADSDQDMVIYNDSIWNNEQITPPVSLCSESCQP  
GTRKGIRQGEVCCFDPCADGEITNTTDARECIECLEDYWSNEKRDECLHKDIEYL  
GYNDPLGIALIVLSILGACVTAAVGAVYLVRRTALVKSNDRGLSFLLLFSLVISFLSS  
VFFVGQPQNWSCMTRQVLLALSFSVCLSCMLAKAFALMLVARAAKAPEKTEQKAA  
GHLQQRVIASIFIFCHA CLCLAWLLIFPPHPLKNTLSQNIKIILECSEGSVFLCCVLGY  
DLLLAAICFIFAFIARKLPDNFNEAKFMTFALLVFFIVWISFIPAYLSTRGKYMVAVEIF  
AILASSFGMLGCLFLPKCYIILLKPERNTEELVTGKTNGNDK

>Cm-V2R13\_SINCAMP00000025021\_837 25275 SINCAMG00000016226

CKRWGIFDLLGLSKDGDIVLGGVFSVHVDVEDQDVNFKTQPRAVKCTNFRFRLFRFA  
MAMIFAIDEINKDPTLLPNITLGYWIYDSCGMPSVSIKTTFEFLNRLEETSSDFTCKRAP  
VVSAAIVGDSGSSQSLAIASLISPFKIPMVS YVATCECLSNRREYPSFFRTIPSDYFQVRA  
LAQLVKHFGWTWIGTVRSDDDYGNFGMKAFTKAVQQLGVCIAFSESFHITYSRGELL  
KTVDIIEKSTTKVVVAFLAQADMTILMNEIVRQNVGTIQWIGSEAWVTTTVLSPGESR

RFLSGTIGIAIRKVHVPGLREFLLRVHPSAYPGNRLVKEFWKMTFNCTLRNGKHKAD  
GIKECTGREDLQSVHNTYTDVSQYRVTYNVYAATY AIAHALHDMLSCESGKGPFPN  
ESCAISRFPQWQLLHYMKT VNFKTKIGENVNFDENGDPVATYDIVNWQPNDLGGT  
ETVTVGHYDGSAPAGQEFKLGKEIVWSVGQITVPRAVCSDSCLPGTRKAAKRGQP  
KCCFDCIECADGEISNITDSTLCLKPCLEYRSNDKRDHCILKEIEFLSFEETLGIALVTLA  
LLGVFITISVFAAFYVHRDTPIVKANNSELSFLLL FALALCFLCSVTFIGEPSVWSCRLLR  
HTAFAITFVLCISCVLGKTIVVMAFNATLPSNNMMKWFGPTQQRLSVFILTLIQCLIC  
TVWLCLSPPYPLKNSEYFTDRIVFECHLGS AVAFYCVLGYIGLLSCVCFGVAFLARRL  
PDFNFNEAKHITFSMLIFCAVWITFIPAYVSSPGKYTVAVEIFAILASSFGLLVFIFAPKCN  
IILLKKEQNTKKHMMGKMASK

>Cm-V2R4\_SINCAMP0000008695\_866 08781 SINCAMG00000005685

FSISAMCCLLIVIVNSALLSVAKATATCKVREEFVSPGLAKGGDVVIGGMFPVSLHV  
NKPDSYITKPDQLRCTGFDLRAFRWIQTMIFTIEEINREAALLPNLTLGYKVYDTCDI  
YALRAVMAFVSDGEETVSYSSCDGASVPAMIGEAGSLQSTIMASTTAPFQIPILSYFST  
CTCLSNKKNYPNFLRMVPSDSFQTQALAQVRHFGWTWIRALGNDDYGRSGVQLF  
SQKVMELGACMAFASHILPKIYSAEILAGIVKVIKESGVRVIVVFASEKKMLELVQEVV  
TGIQWLASEAWVTGAALFNHSLAPYLAGTIGFSFRRAEIPQLREFLLRARPSQDRDN  
FLT VFWHEELNSCKFNMSVDVSSQRQPHLCTGSEDLEEIETIYFDTSQLRVSYNVYKAV  
Y AIAHALRQLQLCQSGRGPFGSNECADVHSFEPWQLLHLYLKGVKFTDHFGGEVAFD  
ENGDAIAVYDIINCQIGAGGDVTFVEVGHFEASAPPGEELVLDEEVIVWAGGKLRYV  
SNSCSWSQPPRSVCSESCPSGMRKASRDGEPLCCFDCVPCAEGEISNQTDSECTKCS  
TDDRSNPERNAYIPKEVEYLSFQEATGIALVAIALFGACLT VTVSVIFFHYKTPPVKA  
NNELSFLLL TSLVLCFLCSIAFIGQPTDWGCKLRYTAFAVIFELCICCVLAKTVVVM  
AFRATLPNSNVMQWFSPAQQRAAVFIAMCVQVLICVAWLMVSPFPFKNTTHQNAK  
IILQCHVGSMAFCTVLGYIGFLSCICFVLAFLARKLPDTFNEAKFITFSMLIFFAVWIV  
FIPVYLSSPGKYTVAVQVFAILSSSFALLLCIFAPKCYIILLQPERNTRQGLMGK

>Cm-V2R22\_SINCAMP00000019659\_799 19856 SINCAMG00000012801

RDFFRGFRLAQTMIFAIEEINRNHLLLPNVTLGFRIHDDCASSKIVTKAALALVNGEET  
GLGYSCTGQSNVIGIVGTQGSSESI A VARVIGPFQVPMVSYFSTCVCLSNRNEYPVFYR  
TIPSDYHQSKALAQIIKFGWTWIATIRSNNDYGNFGMQAFVDIAQELGICIAFSESYF  
RTDPLEKLLKIVNIIKSSTTKVIVAFVAKADMEILLTEIISQNVGTGIQWIGTEAWITAKLI  
SPEESVRFLIGTIGPAIPMLEVKGLREFLLKIHPSSFPGNAFVKKFWETAFOCTFSPGNT  
SQITALSTWQQCTGKEDLTQIHNVYSVSDVSGSSYNVYKAVY AFAHALHNMLSCEK  
GNEPFMNNTCARVSNFQPWQARKLFYNLLHLYLQSVNFTTTSGDRVYFDGNGDPVA  
MYDLINWQIDSRGVSEIKIIGSYDGSASPGHELTLDEEAIWVWKSQNKMPRSVCSESCI  
PGTRKVARKGQPVCCFDCTECAEGEISNITDSTDCIKCPEQYWPNNQRDRCLPKEIEF  
LSFTEMLGGVLLTLALVGVSTTISIAIVFFTHRDTPIVKANNSELSYLLL FALTLFCFSV  
TFIGEPSVWACMLCHTAFAIAFVLCISCILIKQSLDSAFKATLPNNNMAKLFGPAQQR  
WSVFLTSVQCLICTLWLTISHPPMRNTEYYREIIIILECDLGSVSAFYSMAGYIAFLA  
GVSFVLAFLARKLPDNFNEAQCITFSMLTFCAVWITFIPVYISSPGKYTVAVEVFAILA  
SSCGLLFCIFVPKCYIILIKPEMNTKKHLMGKVPVVK

>Cm-V2R12\_SINCAMP00000025037\_870 25291 SINCAMG00000016227

DLLGFIKDGDIVLGGLFSVHSNVQDQDIYFQSQPTAIKCKRLVELFQSKCILHFIAYCN  
ANICVCFTNMRFVLFYSFEMREFRFVQTMIFA VEEINKNPFLLPNITLG YKIFDSCGMP  
SLSIKATLEIVNAQEKTSDDYICKSSPAVSAIADSGSSQSAAIASSVRSFRIPMISYFSTC  
ACLSDKQEYPSFLRTIPSDYFQARALAQIVRHFGWTWIGTIKSDDDYGVFGMQAFTE  
AVQQNGICFAFSEFFRTYPREKLLKTVDVIKKSTTKVIVAFLAQADMAILLEEVARQ  
NISGIQWIGSEA WISTSLLTPEKTRQFLTGAIGIAISKGNISGLKNFLIQLHPSLYPGNVL  
MKEFWEMIFSCTLRKTESKA EKENENPSPRTNECSGKESLRTLNTFTDVSQFRVTYN  
VYKATYAVAHALHNMLSCESGNGPFENKTCATNLNFQPWQLLHYIKMTHFTTPNGE  
NVYFDENGDPVPTYDIVNWQPNNVGGSDVVS VGHYDGSAPLGQELILNENIIVWSSG  
HKKIPRAACSETCHPGTRKAARKGQPICCFDCIPCSDGEISNITDSIHC MKCLSEYWSS  
VQRDQCIPKQTEFLSYSEIIGMVIVIFAIVGACITMIVAVLFFVYKHTPIVKANSELSFL  
LLLALTFCLCSLTFIGEPSVPSCILRHTMFGVSVFLCMSCVLGKTIVVVMFAKATHPR  
KNIMKYFGVTQQRMTVCILTLVQCIICTIWLTIAPPPVKNAISYTDKIILECDVGSVTA  
FYCVLGYIGCLSCVCFVVAFLARKLPDNFNEAKFITFSMIMFCAVWLSFIPVYISSRGK  
YTVAAEVFAILASSFGLLICIFAPKCYIILLKPDNNTKQHLMGKV

>Cm-V2R9\_SINCAMP00000025740\_840 25999 SINCAMG00000016666

MYSCCILFLLVLGTGVLGANQSLCKLRGKFDLPELSMGGDVLLGGLFQIHTKIITQDL  
HFKSQPKTLGSFRWAQTMIFAIEEVNKDPTLLPNITLGYRIYDSCGKHPMSLRAAITLV  
NGQEETVSSSRCTASNVTVIIGDPSSTQSMILSQT LAPFQIPVLSYYSTCSCLSNKFEFPT  
FLRTIPSDNYQVKAMAQLVKRFGWTWIGFVANDDDYGGYGLQIFKDEIQHSGVCI AF  
IEFVPKIYSKAKVLNIVDTIKISSARVVILFAGDVVLLPVMKELLKQNV TGRQWIASES  
AIVSGLLSVKELYPVMGGTIGTTILGARIPGLRDFLLGLQPLKFPGDNFVHEFWGTMF  
NCTFKKVENVHEGTYLQQPCTGFEDLTEQENTYSDVSQLRISYNVYKAVYSVAHAL  
QNLLLCVNDEGPFENRKCADILNLQPGQVRKFKFRSKLGEDIYFDENGDVVAFYDIL  
NWQLDTEGNVQYVKVGRFDASLGRGQELDINEELIFWREGQTTVVKSKCSESCPPGT  
RKGVRKGQPLCCFDCIPCADAEISNQTNSIECTKCPLDYWSNEQRDSCIPKEIEFLSFE  
DDLGIVLSVVALSGTFTTIAVA AVFFYHRNTPIVRANSELSFLLLLSLCFCFLCSLTFI  
GEPLVWSCMLRHAFGISFALCISCILGKTIVVLMFAKATLPNNRMKWLGP TQQRSI  
VAVSTGIQVIIC TLWLATSPPFPPTQSKFRSAKLLLECDVGSVTA FSCMLGYIGLLACL  
FVLAFFARKLPDNFNEAKFITFSMIIFCAVWLT FIPAYVSTPGKYTVAVEIFAILSSSTG  
LLGCIFVPKCYIIMLKPEQNTK

>Cm-V2R19\_SINCAMP00000017492\_889 17655 SINCAMG00000011376

IAMNSLVWLGLLILPVSGIDNQVCKLQAHPRIAELSKNGDIILGGIFNLHSGSYELSHS  
YTRLPDEIHCRRLVYIYSDPIILYWSNMLRTC YVYTNFRVHFSLSGFR LAQTMIFAIEEI  
NRSNTLLPNITLGYRIYDDCISSRIATKAVLALVNGEDKTVSDLKCPAHNKVTAIVGC  
DGSSQSIAVARLIGPFRIPMVSYYSTCSCLSNRREYPSFFRTIPSDYHQSELLVQLVKKF  
RWTWIGTIRSNNDYGRFGMQAFVKSVEKLGVCIA YAESFHRTDPREKVSQIVEVIK  
ATTKVIVAFISVTEM RILLKEIVHKNVTDLQWVGSEAWVTAQVLPPEESATFLVGTIG  
PTIRRRKVTGLQDFLLKIHPTLFPGNFVIEEFWETA FDCILKIKNFTDQEKYPKQCSGEE  
NLLEATDKYLDRALRGNSYNVYKATYALAHAFHKMFSCENTKRSSTNDTCANITHF  
EPWQVLQNLQSVHFTTKAGDHVYFDENGDAVAIYDLVNWQTNVNGTVEIKIIGYYN  
GTSTNDEKLVFNEESITWTTEQKTVPRAICSESLPGTIK VSKRGQPICCFDCVQCADG

EISNTTDAIMCLTCPTRYWSNQGKDQCEKKKVEFLSYGEILGTVLATALAITGVCLTLAI  
AALFFKHRSSPIIKANSELSLLLLSLTLCFLCSLTFLGEPASAWSCMLRRTAFGVAFV  
LCISCVLGKTIVVLVAFKASRPNNKMLKWFSKQQLTIFALTFVQCFTCTLWLTISPP  
FPVENNMYREIIVECDMGSLTAFYCVSGYIALLSCLCFVLAFIARKLPDNFNEAKFI  
TFSMLIFCVVWIAFIPAYVSSPGKYTVAVEVFAILASSFALLVCIFGPKCYIILIKPEQNT  
KKHLMGKE

>Cm-V2R34\_SINCAMP00000017467\_849 17631 SINCAMG00000011348  
MHYLLFWCMLTPIVMLRGEESQCKLEGKFDLPALTKTGEIILGGMFNIHSARLFSVQN  
FTILPKQTECNDFRFRSLVQTMIFAIEEINRNQNLNLTGTYRILDDCSSSTIATKAA  
LALVNGMEESFSFNCSNSPKIPALVGGGGSSESIAVARTIGLFKIPLISYFSTCACLSN  
RKEYPAFYRTIPSDYYQSKLLAQLVKTFFWTWIGVIRSNNDYGNFGMQSFIEAVEKL  
GICIAFSEFSRTPREKIERIVEVIKRSTTKVVVAFSATGEMRLLFREVVQRQNTGIQ  
WIGSEAWVTAELLSPEDESNRFLTGTMGPAIQRATAVVGLRDFLMKEFWETTFSCSLSS  
AKTTKEPNLSPYQQCTGNENLNEIHNAYSDIITDGSSYNVYKAVYAFAHAVHNML  
ACEYGGKGPFTNKTCANVSIFEPWQLRHYMQSVNFTTNTGDKVYFDSNGDPVAKYDL  
INWQSNTQGFPRIVTVGYDASTPPGKELMLNIRKLEWNGGNNKIPRAVCAESCLPG  
TRKVHRKRQPICCFDCTECADGEVSNTTALDCIKCPLEYWTNQRKDKCIQKEIEFLS  
FEEMLGIVLVTIGLVGIGVTLTTTVIFYQHRDTPIVKANSELSFLLLALTLCLCSLT  
FIGEPSMWSCKLRRVSFGIAFVLCISCILGKTILVLMAFKATLPNNNMMKWFGPTQQR  
LSVLLTLIQLICALWLTFSPPSPVKNIKYYRDIILECDVGSITAFYCVSTYIGLLSAVC  
FILAFARNLPDHFNEAKCITFSMLIFCTVWMAFIPAYVSSPGRYTVAVEVFAILASSF  
GLLLCIFVPKCRILLKPENNTRQYIMSKDP

>Cm-V2R3\_SINCAMP00000025739\_860 25998 SINCAMG00000016665  
GIHKDGDVIGGLFPIHFSVTAPQLSYKAKPQELQCEGKKDSKTIFTMFHPVHYPVIMR  
ANAFLTDRFNFRTRWLQMMIFTIEEINKDQELLPNITLGYSIYDNCRKVPQAVRTAV  
TLLNGVDDLFDNDKCTGSPPIAIIIGAARSTHSMIIGRIAGLFSIPVVSYSSSCPCLSDKR  
EFPSFFRTIPSDSFQAKAMAQLVKHFGWTWIGSIATQDDYGYQLVQSFNKQVQEYGA  
CLAFTEAIPKINSQQKILKIVDTIKKSTAKVIVLFAVGDIALADEIVRHNTDRQWIAS  
ETWSTAAMLATKENFGSFGGTIGFAFRKGEIPGFREFLLKVRPSSPPGNGLINRFWEEL  
FGCALNAPDVTSGHTSTNTLSKPVCTGQEDLEKINTIYTDVSQLRVTVYNYKAVYAL  
AHSLSLLCENDKGPFAKTCANNLNFEWQLLHLYLKEVKFTNRLGEKVYFDENG  
DPIASYDIMNWQMDANGSVNINLVGLFDASAALGQELLINEKTISWIGQQKQVPHSV  
CSESCLPGTRKAAKKEQPICCFDCLQCADGEISNQTDSVQCLKCPIDYWSNQGGRDQC  
VLKEVEFLSFEGTLGIIASVALIGACITICVFAIFLHYRNTPIVRANMELSLLLGLSLV  
LCFLCSLFYIGRPSLWSCVLRHTVFGVVSFALCISCILGKTIVVLMAFSATLPNNNMMK  
YFGPLQQTASVLACTILQVIICVIWLITSPFPPTKNTEHQKAKVILECNVGSVAAFCCV  
LGYIGLLASVSFVLAFLARKLPDNFNEAKFITFSMLIFCAVWITFIPAYISSPGKYTVAV  
EVFAILSSSFGLIACNFAPKCYVILLRPEENTKKHLMGRA

>Cm-V2R20\_SINCAMP00000025078\_869 25332 SINCAMG00000016248  
MYNILFWGLLAVFHMQKADDSTCKFQGGKVKLPELSKNGDVILGGIFNVHLNSFHQIH  
SFTGQPVETTCSSFDLEVFRLVQTMIFAIEEINQNPVLLPNVTLGYSKIHDNCASSALAT  
KIALSLVNGPREMEPIQTCSQRYTKSVAFIGCTRSSSEVDIARTIGPFRIPMVSYYSTC

ACLSKRQEYPSFFRTIPSDQYQSKLLAQLVETFGWTWIGTIRSSDEYGIFGMQAFTEV  
EKLGCIAFSESLHRTDGGDKIRRIVEVIKKATTKVIVAFSSSLEMEILVKEVVRQNVTVG  
IQWIGSEAWVLSDLLAPEESAIFLRGTIGPMVRKTQIRGLRDFLMDVHPSMYPGNLLV  
NEFWETQFGCKLMLENGTDQSDTTSVFPLHCTGEENLNQTHNSYSDLTLDGSSYNVY  
KAVYAVAHALHNMFSCKDKEGPFKNNTCAHTLDFKPWQLLHYMHVSQFTTKSQDK  
IYFDENGDPVASYDLVNWQTNAQGLKEITTIGYYDGSAPSGKELVLNKEAIIWNEGQ  
RKVPRAVCSESCPAGTRKVSRRKGESICCFDCTPCAEGEISNNTDSIDCVKCSLEYWSN  
QQKDRCVSKRIEFLSFADTLGIVLVTALVGVCTTAAVA VVFLQYKHTPIVKANSEL  
SFLLLFALALCFLSSLTFIGQPSVWSCMLRRTAFSISFVLCISCILGKTIIVLAFKATLPS  
NNVMKWFQHTQQRLSVLILTSIQFAICVLWLTILPPFPLKNSTHYRDVIILECDSGSRT  
AFYCVSGYIAILSCICFVLAFLARKLPDNFNEAKFITFSMLIFCAVWITYIPASVSSPGK  
YSTAVEVFAILSSSFGLLVSIFTPKCYIILLKPETNTKKHLMSKNAETKI

>Cm-V2R25\_SINCAMP00000022119\_873 22342 SINCAMG00000014366

HLPFKRITMYRLFLCLLFASSMWESNEETCKLQGKFNLQPISKDGDIVLGGIFSLHSGR  
LIQINSCFTAPEETKCRSFDVRVRLVNTMIFAIEEINENSAILPNVTLGYTIYDDCGSPT  
ITTKVALGLMNGQKEEIEESGDCCQESPSIPALVGADGSSESMAVARLIAPFRIPMVSY  
FSTCACLSDRKEYPTFYRTIPSDYHQSKVLAQIIKKFGWTWIGAIRSNNDYGNFGMQA  
FVDIAQELGCIAFSESFHRAESLEKIKKIVNIMKSSTTKVIVAFAPPAEMQILLKEIIRQ  
NVTGIQWIGTEAWITAQIISPDESARFLTGTIGLSIPLFEVKGLREFLLKIHPSGFPGNL  
VKEFWETAFCIFWSGNTSQITAASTLQQCTGQEKLSALHNAVSEVSMDGSSYNVYK  
AVYAVAHALHNMISCEKKGKPFINNTCAHVSNLQPWQLLHYLQSVNFTTTSGDVY  
FDENGDPVATYDLLNWGINSRGA AEIRVIGFYDGSASPGHELTLDEETIEWSSRQKM  
VPRAVCSESCIPGTRKVARKGQPVCCFDCTECAEGEISNITDSTDCIKCPEQYWPNNQ  
RDRCRPKEIEFLSFTEMLGGVLLTLALVGVSTTISIAIVFFTHRDTPIVKANSELSYLL  
LFALTLCFLCSVTFIGEPSVWACMLCHTAFIAIAFVLCISCILIKTILVILAFKATLPNNN  
MAKLFQPAQQRWSVLLTSVQCLICTLWLTISHPPMRNTEYYREIILECDLGSVSAF  
YSMAGYIAFLAGVSFVLAFLARKLPDNFNEAQCITFSMLTFCAVWITFIPVYISSPGKY  
TIAVEVFAILASSFGLLFCIFVPKCYIILLKPEINTRKHLLGKVPVNE

>Cm-V2R33\_SINCAMP00000017434\_812 17597 SINCAMG00000011345

PGDVVLGGMFNVHSDRKLNIFQPEDFLLPSFDFRAFRLAQTMIFAIEEINQNSALLPN  
VALGYRIYDDCSSSTIATKAALSLINDIEETVSGENCRERSRISALIGGGSSLESIAVTRF  
ISPFNIPLVSYFSTCACLSNRKEFPTFYRTIPSDSYQSKVLAFLVRKFGWNWIGTIRVNN  
DYGNFGMQTFIDTVHQLGVCIAFSESFYRTDPIERITDIVQTVKRSSTKVVAFCATRE  
MRILFKELLRQNVTDIQWIGSEAWVTSDTLTSQENTQLLVGTVGTAIRRSGIPGLRDF  
LLSVHPSRFPDNTLVKEFWETAFCIKTLRSESASRKEHLEDLQTAYSYLKIDGPTCNVY  
KAVYAFAHAFHMFSCERGKGPFMNNTCANLSHFEPWQVRGSMHFVASRMLLLHY  
MQSVNFTTSLGDNVYFDVNGDPVGTYDLINWQINSEGKAEMKIIGYYDGSAAAPGQE  
VVLNEKDIIWSSGGQTEVPRAICTESCPRGSRKVIQKGGQPICCFDCTQCSEGEINSTCIR  
CPWDYWSNRLRDQCLPKATDFLSYTEPVGAALASLALTGLCTTLVVA AVFFQSRHTP  
IVKANSELSFLLLFALWLCFLCALAFIGEPSGRTCKLRRGAFSVSFVLCCLSCVLVKT  
LVLLAFKTTVPNNSVLRWFDATKQRLSVFILTFVQSFICALWLTLSPPFPLKNTEYYED  
IIILECAVGSVTAIFYWASAYIALLSVCFLIAFFTRKLPDNFNEAKCITFSMLIHCAVWI  
TYIPVYVSSPGRHSVAVEVFAILMSSFALLVCIFAPKCYIILLKPAQNTKK

>Cm-V2R26\_SINCAMP00000014932\_525 15070 SINCAMG00000009727

VMFSPYVWLLIACCVWGSQGKHCRLQGKFNLSKDGDIVLGGIFNVHVDHFEQM  
NTFVTAPEETKCKSLDFRAFRLVNTMMFAIEEINQNPALLPDITLGYKIYDDCGSSNIA  
TKVALSLVNGQGATEDDHNCEGPPNVPALVGGDGSSDSIAVARSIGPFRIPMVSYFST  
CVCLSDRNEFPTFYRTIPSDYHQSKALAQIKKFGWTWIGTIRSNNNDYGNFGMQAFVD  
IAQELGICIAFSESFYRTDPLEKIRKIVNIMKSSTTKVIVAFASGEMRILFKEIRQTVT  
GIQWIGTEAWITAQIISPDESARFLTGTIGLSIPLLEVKGLREFLLKIHPSGFPGNSLVKE  
FWETAFCIFWSGNTSQITAASTLQQCTGQEKLSALHNAYSEVSVVDGSSYNVYKAVY  
AVAHALHNMISCEKKGKPFMNNTCAHVSNLQPWQLLHYLQSVNFTTTSGDSVYFDE  
NGDPVATYDLLNWGINSRGAAEIRVIGFYDGSASPGHELTLDEEAIWSSRQKTVYN  
SC

>Cm-V2R17\_SINCAMP00000025043\_843 25297 SINCAMG00000016239

MCFPMLCVLLISVLPVWLTEETTCKRWGMFDPLSLTKDGDIVLGGVFSIHVDVEDQ  
DMNFKTEPKAVTCTKFLFRMFRLAMAMIFAIEEINKDLSLLPNITLGYWISDSCGTPA  
VSIKRTDFLNRLEQTSSDFICKRAPVVSIVGDSSSSLSAAIATLISPGIPLVSYVATC  
ECLSNRKEYPSFFRTIPSDYFQVRALAQLVKHFGWTWIGTIRSDTDYGNLGMQAFTE  
AVEQLEICIAFSESFATTYSKEELLKTVDIKKSTTKVVVAFLAHPHMSTLLKEIVRQN  
VTGIQWIGSEGWVTTTHLSPEESRRFLSGTIGIAIRKVQVPGLREFLLQVHPSAYPGNR  
LMKEFWERTFNCTLGNEEHKEDLITECSGRENLQNVHNTYTDVSQYRITYKVYTATY  
AIAHALHDMSSLCDYFFFSCYFPMKLLHYMKTVNFNTKIGENVHFDENGDPVATY  
DIINWQPNDLSGTDIITVGHYDGSAPPGEFEKIREEAIVPRGVCSDSCLPGTRKAARRG  
QPKCCFDCIECADGEISNITDSTLCLKCPLYRTNDKRDHCTLKEIEFLSFEETLGIALV  
TLALLGLLVFAAFYVHRDTPIVKANNSELSFLLFALALCFLCSVTFIGEPSVWSCRRLR  
HTAFAITFVLCISCVLGTIVVMAFNATLPSNNMMQWFGPTQQRLSVLILTLIQCLIC  
TVWLCLAPPYPLKNSEYFPERIVFECHLGSVAFAFYCVLGYIGLLSGVCFVVAFLARRL  
PDFNFNEAKHITFSMLIFCAVWITFIPAYVSSPGKYTVAVEIFAILASSFGLLVCILAPKC  
YIILLKKEENTKKNMMGKNVSKKQ

>Cm-V2R23\_SINCAMP00000007321\_862 07400 SINCAMG00000004772

KIAVMYYLLFGVLLAGSLRKSNEESCKLRGNFNLPGISRAGDIIILGGIFNVHADRFEQI  
NLFRNAPEVTKCKSDFDFREFRLVNAMIFAIEEINRNQTLLPDVTLGYNIFDDCASASIA  
TKVALGLVNGQVEEESDPQCEGPPRVPALVGGDGSSSESIAVARSIGPFKIPMVSYFSTC  
ACLSDRKEYPTFYRTIPSDYHQSKALAQIKKFGWTWIGTIRSNNNDYGNFGMQAFVDI  
AQELGICIAFSESFYRTDSHDKIRKIVNIIKISTTKVIVAFATAKREMRILLKEMIRQNVTG  
IQWIGTESWITAQIISPAEVTRFLTGAIGPSIPSLEVVKGLREFLLKIHPSGFPGNSLVKEF  
WETA FNCTFWSGNTSQITAYTLQQCTGNEDVTEIHNAYSVSMGSSYNVYKAVYA  
VAHALHNMFLCEKKGKPFINNTCAHSSNFQPWQLLHYLESVNFTTKSGDVTNFDEN  
GDSVATYDLVNRINSKGTAEIGTIGFYDGSASLGNELVVDEEVIVWNDGQNEMPR  
AVCSESCIPGTRKVARKGQPVCFCFDCTECAEGEISNITDSTDCIKCPEQYWPNQQRDR  
CRPKEIEFLSFTMLGGVLLTLALVGVSTTISIAIVFFTHRDTPIVKANNSELNLLLLFA  
LTLCFLCSVTFIGEPSVWACMLCHTAFIAIAFVLCISILIKTILVILAFKATLPNNNMAK  
LFGPAQQRWSVFLLSVQCLICTLWLTISHPFPMRNTEYYREIIIILECDLGSVSAFYSM



AGYIAFLAGVSFVLAFLARKLPDNFNEAQCITFSMLIFCAVWITFIPVYISSPGKYTVA  
VEVFAILASSFGLLFCIFVPKCYIILIKPEMNTKKHLMGKV

>Cm-V2R21\_SINCAMP00000017432\_758 17595 SINCAMG00000011343

IEEINRNHLLLPNVTLGFRIHDDCASSKIVTKAALALVNGQETGLGYSCTGQSNVIGIV  
GTQGSSESIAIKYINDILNVFYQSQVSYFSTCVCLSNRNEYPVFYRTIPSDYHQSKALA  
QIIKKFGWTWIGTIRSNNNDYGNFGMQAFVDIAQELDICIASFESFYRTDSHEKIRKIVN  
VIKSSTTKVVAFVPMGEMRILLKEIISQNVGTGIQWIGTEGWTTSQLISPEESARFLIGTI  
GPAIPMLEVKGLREFLLKIHPSSFPGNFVKEFWETVFQCTFPSGNTSQITALSTWQQC  
TGKEDLTQIHNVYSVSDVSDGSSYVYKAVYAFahalHNMLSCKEKGNPFMNNTCA  
RVSNFQPWQARKLYPVAMYDLINWQIDSRGVSEIKIIGSYDGSASPGHELTLDEEAIV  
WKSQGNKVPRAVCSESCIPGTRKVARKGQPVCCFDCTECAEGEISNITDSTDCIKCPE  
QYWPNQQRDRCLPKEIEFLSFTEMLGGVLLTLALVGVSTTISIAFVFFTHRDTPIVKAN  
NSELSYLLLFALTLCLCSVTFIGEPSVWACMLCHTAFIAIAFVLCISCILIKTILVILAFK  
ATLPNNMAKLFQPAQQRWSVFLTSVQCLICTLWLTISHPPMRNTEYREIILECD  
LGSVSAFYSMAGYIAFLAGVSFVLAFLARKLPDNFNEAQCITFSMLIFCAVWITFIPVY  
ISSPGKYTVAVEVFAILASSCGLLFCIFVPKCYIILIKPEMNTKKHLMGKVP

>Cm-V2R6\_SINCAMP00000008707\_798 08793 SINCAMG00000005700

FIWATLLLNCRCMTAAADPVCKLWEKFSPGAFEDGDLILGGLFGIHLRTAPDYNFSH  
SEPQLIPCLEFNQRGLRWMQTMIFAIGEINRSLELLPNVTLGYKILDSCDIASEGLKEAL  
KLLNDEQDIISNPSCGGFPSIPIVGDGSSQSVAVSRIVSPFGIGLVSYYASCTCLSNKG  
EFPTFFRTIPSDAVQIKAIVRLLQHFRWTWVGAVAEDNDYGRFGMMSFIQEVARSDIC  
ISFIEFISATRTEERILEVVNTIKTSTAKVVIIFCGEVETPLLVKELRLQNISDIQLIASEA  
WITSFHLWTEETDEILFGTLGFGIRKAEIPGLREFLVTLHPSTASDNPFVEELWEEVFG  
CSVNILALSPGQSEMSLYTQCTGSESLNETIYTDVSQLRVSYVYKAVYAIahal  
HNLLCEDGKGFANKTCGRKSHIEPWQLLHYLKEVSFTNQFGEDIAFDEYGDPIASY  
DLINWQRSEDGSLQLVKVGYDASLSPGEELVLDEGRVTWHGTGNTVPVSACSQSC  
VPGTRKALQEGQPICCFDCLPCADGEISNQTDATECIKCPVESWSNGQNDECVPKEIE  
FLSFQDTMGITLTVISLSGACITVTVACVFLYFIKTPIVKANNSELSFLLTSLILCFLCAI  
AFIGQPTAWSCMVCHTVFGVSFVLCISCILGKTLVVLMAFRATLPGSNVMKWFGATQ  
QRSIVFITTLIQMILCIWLTTSPFPKAKNFYHKATIILECDVGSTVAFCCVLGYIGLLA  
GTCFILAFARKLPDQFNEAKYITFSILIF

>Cm-V2R24\_SINCAMP00000000807\_875 00817 SINCAMG00000000498

QHLFPKRITMYRFLCLLFASSMWESNEETCKLQGTFLNPQISKDGDIVLGGIFNIHAG  
RLIQINSFFTAPEETKCRSDFRVRFLVNTMIFAIEEINQNRAMLPNVTLGTYTIYDACGS  
PTIATKIALGLMNGQKEEETESGDCCQESPSIPALVGADGSSESMAVARLIAPFRIPMV  
SYFSTCVCLSDRKEFPTFYRTIPSDYHQSKALAQIIKKFGWTWIGTVRTNNDYGNFGM  
QAFTEIVQRDLICIAFSESFYRTDSHEKITKIVNIIKSSTTKVVAFVAKGEMEILLSEIIR  
QNVGTGIQWIGTEAWITAKLTTQGESTKFLIGAIGPSIRLMEVKGLQEFLFKIHPSSFPGN  
SLVKEFWETAFCIFWSENSTQIRTTSTLQQCTGNEDLTEIQNAYSVSDVSMGSSYVY  
KAVYAVAHALHNMLLCEKKGKEPFIDNTSNPCARLSKFQPWELLGYLQSVNFTTTSGD

SIYFDENGDSVATYDLVNWRLNSKGTVEIGIVGFYDGSAPFGHELMLDEEAIVWNSG  
QNEVPRAVCSESCIPGTRKVTRKGRPVCCFDCTECAEGEISNLTDSTDCIKCPEQYWP  
NQQRDRCLPKEIEFLSFTEMLGGVLLTLALVGVSTTISITIVFFTHRDTPIVKANNSELS  
YLLSLLHLTLCFLCSVTFIGEPSVWACMLCHTAFAIAFVLCISCILIKTILVILAFKATLP  
NNNMAKLFQPAQQRWSVFLVQCLICTLWLTISHPFPMRNTEYYREIIIILECDLGSV  
SAFYSMAGYIAFLAGVSFVLAFLARKLPDNFNEAQCITFSMLILCAVITFIPVYISSPGK  
YTVAVEVFAILASSFGLLFCIFVPKCYIILIKPEMNTKKHLMGKVSN

>Cm-V2RL3\_SINCAMP00000007400\_825 07481 SINCAMG00000004834

LNMFPMLHLILAVSCWVLCFNSARLCDTPDILIANSSGDIIGGLFPIHRVGPDTNRTQPG  
PITCSDFNPNFITANAMIYSIDQINNSTLLPGIKLGYEYDTCSDVIAAVEATTRFLSTS  
ENCVEVRCNYTDYRPNIKVVVGSTFSEVSIAVARILNRY  
LMPQVAYAASAKLLSNKNRFASFLRTVPSDIHQTAALAEVKKFNWNWIAVIATND  
DYGRSAMNDFIVKSQNLNICFEFSELIPIYEGEAQNARIEEIAKKIKNSTSNVIVVFRG  
QFVKLLFKKIKMLKVKKTWIASDAWSNSRNVADLDDTADVKGIMGIVFKNGDIRNF  
PDYMQTLNRSSTNIKFINNYKTNCVASEDNLTDCIRISYAYRVNLAIRAIHALQKK  
LSCDSENCSTRDFNFAPWQLLNFLKNVSFTHENGKFEFDDSGDFTDGYDFISWQLVNG  
SVQFQPIGGYDLKTKKVIINDSYFNTVKVMFFLKYIDIKSSCSGTCQPGERKNVSSTNS  
CCYGCIPCAGRYSERNDSNDCDVC PGDWWSEKGSSTCKPRTFEFLRWNDVVSIVLI  
TFTCLGILVICVIVVLFKRNWGTAVNAAGGWLSYMLFSILLSLVSIFFFIGKPDNFK  
CQIRQPFPGISFTCCISCILVKSFRILAFTFNPILRKKLKYIYKVPPIITITGIQVICTTWL  
LTMHPYVDKNASNSGIIFLSCQEGSIVGFGFMLSIIYLLAFICFIFAFKGRKAPDNYKE  
AKFITFSVLIYLIVWILFILVYINEEEGHKNLPAIEVVAILASIFGILCCQFGPTSIVCFK  
NESNVESNYLVQVREYL

>Cm-V2R2\_SINCAMP000000025730\_858 25989 SINCAMG000000016660

SRMCCHLNVCLLLFCLMFSVSGGVPPGCKLHEYTSYGVLQDADVIIGGVFPLHGSND  
VSNFPYTSQPVEKKCNDRFNIRTYRWMQDMIFTVEEINKDPELLPNITLGYAIYDTCY  
NIPKTVENAFALVSGKETFTPNYQCKLNSTLAAVVGGSSISTISIAMASVLGLYRYPQIS  
YFSSAPILSNKQQFSPFFRTMPSDIFQSRAFVIVKQFGWKWVGVLADDIDYGLQAVQI  
FIKEAKNLGVCIAFSEKIPITYSREKYLQIVDTIKASSAKVIVAFSCDRNIAPLLDEIVQQ  
NVTDRTWLASVGVSTSGPLFIIRKKYIKHWTGTIGITLPLCNIEGLQEFLFQLHPLRRT  
HDIHLPWEEMFDCSWTSFLEQEKKRELNQHIFTDVTNLRRTSCNVHNAVYSVAY  
ALHDLQSCVDGKGFENGTCANIHNFEPWQMLHYMKKVRFMDSKNEQRFEDEDGD  
VAAIYDVINWQETADGVINFKIGHYDSRKAPGHQLTIGDQEIIWNNGDLEVPQSVCS  
EACLPGTRRIVQQGQPRCCFDCVPCAEGNISNGTECTQCPEDSWSNQQKDECLPKEIE  
FLSFEEPLGIILTVFSLGAVITVVIIVIFIKFLNTPIVRANNHEL SLLLFSLFFCFLCCLT  
FIGEPSVEFCVLQQTGFGISFALCISCILVKTSVVVLAFKMTAPNQNM SKYFRPIHHRIV  
VTAITLVQIGISLGLISSPLVVQRNSQAVIGKIILECNKEPELALIGILGYIGTLALLCFIL  
AFLARKLPNNFNEAKFISFSLVFFVWVLSFIPAHASSKGKYLVAVEIFAILSSTFGLLA  
FIFPKCYVVLMPDLNNTKQGMGRAPPQIS

>Cm-V2R31\_SINCAMP00000005980\_814 06049 SINCAMG000000003895

LLKLTYNIQDSDIPATLMVDFSCSLDFRAFRLVNTMMFAIEEINQNPALLPDITLGYKI  
YDDCGSSNIATKVALSLVNGQGATEDDHNCEGPPNVPALVGGDGSSIESIAVARSIGPF

RIPMVSYFSTCVCLSDRNEYPTFYRTIPSDYHQSKALAQIIKKFGWTWIGTIRSNDDYG  
NFGMQAFVDIAQELGICIAFSEFSRSDSNEKIRKTVNIIKSFTAKVVVAFAAPREMQL  
LLKEVIRQNLGTIQWVGTEAWITAQLIAPNESARFLIGAIGPAIPSAEVKGLQEFLMKIH  
PSKFPGNLSVQEFWETAQCSFWSGNTSQTNTTSTLQQCTGKEDVTEITQYSDVTMD  
GISYNVYKAVYALAHALHNLLLCERGKGPFMNKTCAHTSNFQPWQILHYLQSVNFT  
SKSGDRIYFDENGDPVAKYDLINWQKNLKGVAETRVIGFYDGSASPTRELTVNEEAI  
VWSNGQTEIPRAVCSESCISGTRKVARKGQPVCCFDCTECAEGEISNITDSTDCIKCPE  
QYWPNQQRDRCLPKEIEFLSFTEMLGGVLLTLALVGVSTTISIAIVFFTHRDTPIVKAN  
NSEL SYLLL FAL TLCFLCSVTFIGEPSVWACMLCHTAFAIAFVLCISCILIKTILVILAFK  
ATLPTHMAKLFPGAQQRWSVLLLTSVQCLICTLWLTISHPPMRNTEYYREIIIIECDL  
GSVSAFYSMAGYIAFLAGVSFVLAFLARKLPDNFNEAQCITFMSLIFCAVWITFIPVYI  
SSPGKYTVAVEVFAILASSFGLLFCIFVPKCYIILIKPEINTKKHLMGKVPA

>Cm-V2R30\_SINCAMP00000007302\_578 07380 SINCAMG00000004755

FSVQCSDFGLKGPFYKSTLLKLTYNIQDSDITATLMVDFSCSLDFRAFRVNTMMFA  
IEEINQNPALLPDITLGYKIYDDCGSSNIATKVALSLVNGQGATEDDDHCEGPPNVPAL  
VGVAGSSDSIAVARSIGPFRIPMVSYFSTCVCLSDRNEYPTFYRTIPSDYHQSKALAQII  
KKFGWTWIGTIRSNNDYGNFGMQAFVDIAQELGICIAFSESFYRTDPFEKLIKIVNIIKL  
STTKVVVAFAAGDTEMQLLLKEVIRQNLGTIQWVGTEAWITAELIAPNESARFLIGAIG  
PAIPSAEVKGLQEFLMKIHPSKFPGNLSVQEFWETAQCSFWSGNTSQTNTTSTLQQCT  
GKEDVTEIPNGYSDVTMDGISYNVYKAVYALAHALHNLLLCERGKGPFMNNTCAHS  
SNFQPWQILHYLQSVNFTSKSGDRIYFDENGDPVAKYDLINWQKNLKGVAETRVIGF  
YDGSASPSRELTVNEEAI VWSNGQTEIPRAVCSESCIPGTRKVARKGQPVCCFDCTEC  
AEGEISNITDSTDCIKCPEQYWPNQQRDRCPKEIEFLSFTEMLGGVLLTLAL

>Cm-V2R27\_SINCAMP00000005810\_870 05875 SINCAMG00000003760

RNQQRSSVMFSPYVWLLIACCVWGSQGKHCRLQGKFNLSKDGDIVLGGIFDVHV  
DHFEQMNTYLVSYCAFYHSAESYYNVNSFRFVNTMVFA TEEINQNPALLPDITLGYKI  
YDACGSSNIATKVALSFVNGQGATEDDDHCEGPPNVPALVGGDGSSVSIAVARSIGPF  
KIPMVSYFSTCVCLNDRNEYPTFYRTIPSDYHQSKALAQIIKKFGWTWIGTIRSNNDY  
GNFGMQAFVDIAQELGICIAFSEFSRSDSHEKIRNIVNIIKLSTTKVVVAFAAPREIQL  
LLKEVIRQNLGTIQWVGTEAWITAQPIAPNESARFLIGAIGPAIPSAEVKGLQEFLMKIH  
PSKFPGNLSVKEFWETAQCRFWSGNTSQTNTTSTLQQCTGKEDVTEIHNGYSDVTM  
DGISYNVYKAVYALAHALHNLLLCERGKGPFMNNTCAHTSNFQPWQILHYLQSVNF  
TSKSGDRIYFDENGDPVAKYDLINWQKNLKGVAETRVIGFYDGSASPSRELTVNEEAI  
VWSNGQTEIPRAVCSESCIPGTRKVARKGQPVCCFDCTECAEGEISNITDSTDCIKCPE  
QYWPNQQRDRCLPKEIEFLSFTEMLGGVLLTLALVGVSTTISIAIVFFTHRDTPIVKAN  
NSEL SYLLL FAL TLCFLCSVTFIGEPSVWACMLCHTAFAIAFVLCISCILIKTILVILAFK  
ATLPNNMAKLFPGAQQRWSVLLLTSVQCLICTLWLTISHPPMRNTEYYREIIIIECD  
LGSVSAFYSMAGYIAFLAGVSFVLAFLARKLPDNFNEAQCITFMLIFCAVLDHFYTYIS  
SPGKYTVAVEVFAILASSFGLLFCIFVPKCYIILIKPEMNTKKHLMGKVPV

>Cm-V2R29\_SINCAMP00000020657\_663 20862 SINCAMG00000013446

LPRSSVMFSPYVWLLIACCVWGSQGKHCRLQGKFNLSKDGDIVLGGIFHIHVDRF  
EQMNTFVTAPEETKCKSLDFRAFRVNTMMFAIEEINQNPALLPDITLGYKIYDDCSV

SNIATKVALSLVNGQGATEDDDHNNCEGPPNVPALVGGDGSSASIAVARSIGPFGIPMV  
SYFSTCVCLSDRNEFPTFYRTIPSDYHQSKALAQIKKKFGWTWIGTIRSNNDYGNFGM  
QAFVDIAQELGICIAFSESFYRTDPLEKIRNIVNIKLSTTKVVVAFAVRSEMKFLFKEVI  
RQNFTGIQWVGTEAWITAQLIAPNESARFLIGAIGPAIPSAEVKGLQEFLLKIHPSKFPG  
NSLVQEFWETAFCFSWGSNTSQTNTTSTLQQCTGKEDVTEIHNGYSDVTMDGISYN  
VYKAVYALAHALHNLLCERGGKPFMNTCAHTSNFQPWQILHYLQSVNFTSKSGD  
RIYFDENGDPVAKYDLINWQKNLKGVAETRVIGFYDGSASPTRELTVNEEAIVWSNG  
QTEIPRAVCSSESCIPGTRKVSRSQPVCCFDCTECAEGEISNIIDSTDCIKCPEQYWPNQ  
QRDRCLPKEIEFLSFTEMLGGVLLTLALVGVSTTISIAFVFFTHRDTPIVKANNSELSYL  
LLFALTLCFLCSVTFIGEPS

>Cm-V2R5\_SINCAMP00000017477\_747 17640 SINCAMG00000011356

NMLLHGILWFLLIQTVSRVAGGDVTCKLQDNFNTRGLFKSGDVVLGGLFIVHFRTA  
QRNTSLHSPKPEEKRCQEFNLRGLRWVQTMIFTIEEINRNPALLPNTTLGYRVMDSCT  
SSEALKCTLQFLNQDEEKAPLGHQCDRSPSVPLIIGDAGSSHSAAVSRIVGLFGIPLVS  
YFATCACLSDKREFPTFLRTVPSDAVQVKALVSLVQRFQWTWVGVAADSDYGGQFG  
IQSFIEEVTNSNVCIAAYIEFIPPVTRDMMIQIVNTIGTSSARVMVLFCEGSDTLVIEGL  
KEQNITDIQLIASEAWVTSSLLWTEETQELLSGTIGFGIRKAEIPGLREFLVKLHPSTAP  
DNPVRELWQEVFGCELETRIGLLEQNTSLSPYGPCTGLENLETIENIYTDVSQLRVSY  
NVYKAVYAAAYALHNLLSCELEKDPFTDNTCGQKFTILPWQLLHYLKEVRFTNGFG  
EDIAFDDYGDPIASYDLINWQRTANGSVDFVKVGYDAALLPGEELVLDESTIYWNG  
RQNNVPISVCSLSCPPGSRKAARKDQPICCFDCIVCADGEVSNQTDVSECLRCSVHHW  
SNDRRETECILKDTEYLSFQDTMGITLTVISLSGACITVTVACVFLYFIKTPIVKANNSEL  
SFLLLTSLILCFLCAIAFIGQPTAWSCMVCHTVFGISFVLCISCILGKTLVVLMAFRATL  
PGSNVMKWFEGATQQRIVFITTLIQMILCIIWLTTSPFFPAKNFKY

>Cm-V2R14\_SINCAMP00000025044\_595 25298 SINCAMG00000016241

MTKVNFKTENGENIYFDENGDPVATYDIVNWQSNAFHGTDIVTVGQYDGSAPAGQE  
FTINESAIVWNSAFYIHRDTPIVKANNSELSFLLLALFLFRLFRFAMAMIFTIEEINK  
DPSLLPNITLGYWISDSCRMPVAPVVSIVGDSSSSLSAAIATLIAPFRVPMVSYFATC  
ECLSNRREYPSFFRTIPSDYFQVVALAQLVKHFGWTWIGTIRSDDDYGNFGMKAFTE  
AVQQLGVCIAFSESFHKSTTKVVVPRAVCSDSCLPGTRKAARNGQPKCCFDCIECAD  
GEISNITDSTVCLKCPLEYRSNDKRDHCILKEIEFLSFEETLGIALVTLALLGVFITFSVF  
AAFYVHRDTPIVKANNSELSFLLLALVLCFLCSVTFIGEPSVWSCRLRHTAFGITFVL  
CISCVLGKTIVVMAFNATLPSNMMKLFGPTQQRLSVFILTLIQCLICTVWLCLSPPY  
PLKNSEYFKERIVFECHLGSAAVAFYCVFGYIGLLSCVCFVVAFLARRLPDNFNEAKHI  
TFSMLILCAVWITFIPAYVSSPGKYTVAVEIFAILASSFGLLVCIFAPKCYIILLKKEENT  
KKHMMC

>Cm-V2R28\_SINCAMP00000017718\_763 17887 SINCAMG00000011524

VMFSPYVWLLIACCVWGSQGKHCRLQGKFNLSKDGDIVLGGIFDVHVHPFEQMN  
TFVTAPEETKCKSFNFRAFRLVNTMMFAIEEINQNPALLPDITLGYKIYDDCGSSNIAT  
KVALSLVNGQGATEDDDHNNCEGPPNVPVAVGVAGSSESIAVARSIGPFRIPMVSYLSTC  
VCLSDRNEYPTFYRTIPSDYHQSKALAQIMKKKFGWTWIGTIRSNNDYGNFGMQAFVD  
IAQELGICIAFSEIYRTDPLEKISNIVNIINFWSGNTSQTNTTSTLQQCTGKEDVTEIHNG

YSDVTMDGISYINVYKAVYALAHALHNLLLCETGKGPFMNNTCAHTSNFQPWQILHY  
LQSVNFTSKSGDRIYFDENGDPVAKYDLINWQKNLKGVAETR VIGFYDGSASPSREL  
TVNEEAIVWSNGQTEVIPRAVCSESCIPGTRKVARKGQPVCCFDCTECAEGEISNITDS  
TDCIKCPEQYWPNQQRDRCLPKEIEFLSFTEMLGGVLLTLALVGVSTTISIAFVFFTHR  
DTPIVKANNSELSYLLLFALTLCFLCSVTFIGEPSVWACMLCHTAFAIAFVLCISCILIK  
TILVILAFKATLPNNMAKLFGPAQQRWSVLLTSVQCLICTLWLTISHPPMRNTEY  
YREIIIIECDLGSVSAFYSMAGYIAFLAGVSFVLAFLARKLPDNFNFAQCITFSMLIFCA  
VWITFIPVYISSPGKYTVAVEVFAILASSFGLLFCIFVPKCYIILIKPEMNTKKHLMGKV  
SN

>Cm-V2R32\_SINCAMP00000001223\_808 01240 SINCAMG00000000790

LLKLTYNIQDSDIPATLMVDFSCSLDFRAFRLVNTMMFAIEEINQNPALLPDITLGYKI  
YDDCSVSNIA TKVALSLVNGQGATEDDHNNCEGPPNVPALVGGDGSSASIAVAR SIG  
PFGIPMVSYFSTCVCLSDRNEFPTFYRTIPSDYHQSKALAQIIKKFGWTWIGTIRSND  
YGNFGMQAFVDIAQELGICIAFSESYRTDPLEKIRNIVNIIKLSTTKSCGGFCCPFRNE  
VLIQRSNTTKTSLEYTQLIAPNESARFLIGAIGPAIPSAEVKGLQEFLKIHPSKFPGNSL  
VQEFWETAFCFSWGSNTSQTNTTSTLQOCTGKEDVTEIHNGYSDVTMDGISYINVY  
KAVYALAHALHNLLLCERGGKPFMNNTCAHTSNFQPWQILHYLQSVNFTSKSGDRI  
YFDENGDPVAKYDLINWQKNLKGVAETR VIGFYDGSAPPSRELTVNEEAIVWSNGQT  
EIPRAVCSESCIPGTRKVARKGQPVCCFDCTECAEGEISNITDSTDCIKCPEQYWPNQ  
RDRCLPKEIEFLSFTEMLGGVLLTLALVGVSTTISIAIVFFTHRDTPIVKANNSELSYLL  
LFALTLCFLCSVTFIGEPSVWACMLCHTAFAIAFVLCISCILIKTILVILAFKATLPNN  
MAKLFGPAQQRWSVLLTSVQCLICTLWLTISHPPMRNTEYREIIIIECDLGSVSAF  
YSMAGYIAFLAGVSFVLAFLARKLPDNFNFAQCITFSMLIFCAVWITFIPVYISSPGKY  
TVAVEVFAILASSFGLLFCIFVPKCYIILIKPEMNTKKHLMGKVS

### TAS1R

>Sc-TAS1R6\_sf77178

TSYTRMRYYNRGNKGKDQDNLLFLEVSLFSFTECVPCSLNQWSPSKSTVCHNKHLVYL  
RWNESISVAIALGTGIGLILIVLIGAIFAIHLNTPIVKAAGGKLCFVLLSALAVSCTSVYS  
FIGEPNVELCFIRKLVFTVSYTTCLACLLVRSFQLVLIFKMASKLPKAYRYWVKYNGQ  
YIFVFIATVTEIAVSFIWIFSKFPVFERNYDISKTEVILMCGPTNLLISLLSISGPISL  
FVFAYLGKNLPKNYNEAKYIAFSMALVLF SWIFLFLVVVSSPDSHIPGVEAAVLLNS  
YSITVGYFFPKCYIILLKPERNTTAFQTCIQEYTRNRETQ

>Sc-TAS1R4\_sf103627

VNDIEIFADPYHCMDCLWQQWSPPKSPLCLERELYLEWNSAFSIFLLILANGGIVMTI  
TIAIIFTLNYNTPVVKSAAGGRTCFMLVSMCTFSCVYFYIGKPSKVFCQIRQPFVLSF  
TICLSCILVRSFQIVCIFKMAAKLPKAHDYWVKYNGQYLFIFLSTCIQIVICAVWLITDP  
PTPNGHIIERAILDCNIGSMIAFSLFLYTVLLTVACFLFAYMGRDLPKNYNEAKFIAF  
SMMICFVYYILYMTSMVTPNQERYTSSIQTFLT VTSAFSIAIGYFLPKCSIILFIPQNTM  
TYFQFCIQDYTKKQNGPN

>Sc-TAS1R8\_sf45865

NDLCTNPSATVTTSPSSTDNQCLPCLKNEWSLSKSVCEQKKTIEFLQWTDTLAILLAS  
LTAVGLFIIAAITGIFIINLNTPMVQLAGGTTCLVMLISMAISCCSLYCFMEKPNWLFCT  
IRQPIFSISLTGCLSPMLVKSFQVSGLFKISGSTPQWWPGFMRYKGRYLMVCLLFLQI  
VVCTVWLSTSPPSVFANYNISVSAIVMECDEGLMTGFGLLLAYNGLLALACFLCTFM  
VQSSAKTYNLARHITFAMLIYLMAWVFFIPAYTTAKGKFVSSIQLFACLVSVYGIITAY  
FLPKCYIILLKPEFNSQSYCQSPINNPPTTE

>Sc-TASR3\_sf5698

ISFGASSEQLSNKKSYPFLRSTPSDRNQAKAIVSIIRKFNWNWIAGIGSDDEYGRQGIE  
LVQQYASLQGICISYIQMIPTYLSLPSTKQKISEITGQIRQMNVDVIVLFSSEGPAQELL  
KQVVKNITGKVVIGSEAWVEAATISHTPDIERIGTVLGTLVNSGSM PGFVDYVLNH  
LTNIRD TREWRISAEHGDNQLFPFWPYPTESSGQLLRDFQHLGPDNLSVVLDPVRRRT  
TFSVYAAVYSIAYALHAMLKCSNGRCQSTANWYNWQVSLTGGFSCSDCQSDEWSP  
KSPVCFKKILQYLSWDSPVGVAMLLFMGLELTLILAVMGIFLLNSSAPIVEGTGGKMN  
MVTLTSLALLCCSTLLYLGEPTTELTKSIQPVTAFLSLTVCISTLLVNSIQILLSTEFTGVT  
KSLHRYKHSGWYITICTSLGGQGAICYFWLNTDGDFLMKTGSSDALVLFCKSDS  
EVIFWLMLGYSGLQALACFMCTFLVQTPAGTYNLAREISVSMLLYSTTWICFIPIYPA  
VNKKHAPAIQITASLLSSFAILSAYFIPKCSVIWFKPQQSTPEY

>Sc-TAS1R5\_sf48040

MTDCVLPLQISFGASSEELSDKKLYPNFMRTIPNDESQIKAIVLLMQEFRWNWISVIGS  
STDYGENGKRKVISRAAAVGICVASHGTIPQEASESKQEVINIIEDITTNRVNVVVVFT  
TVQYAEYLFRVVLDMNITGKVVILSEAISVQRILSEIPNIKRIGHTVLGIAVMQKMPG  
YKEFVLRDITAWNPGINQRVKYSDPQEEKQECPADSFMPFTFNQCVPCTSDGVRSLLR  
HSDWRVEFNVYSAVYAGARGLHQLLQCDSGECKKEGAHPWQVRKF

>Sc-TAS1R7\_sf28750

FVPLHRFHLDGFHWLQAMKFAIEEINNSSTLLPGVTLGYTIQDTCLNSLVAMQSAISF  
LAPKNGNRFELKCDYMDYRTRVLAVLGPSNSELSRVIARLFSFLLIPQVFFLLQISYAA  
SSNFLSDRMSFPSFYRTIPTDEVQAAAIVSIVEMFQWNWMAVIGTDNMYGRRGIEHFT  
KLASKSGICIAYEELIPLNLPDSEHQKRMVSVIKNIVYSRVNVTAVFADEEYAKTLMTI  
ILEQNVGTGKVIASEAWATSKIVARSPNISSIGTILGVAIKSSYIPGFKYYISTALAHSP  
KSQKCRSDHKSLEKEEKEQSVSEGDGLVEDMQRISFNVYSVYAVAHALHLLRC  
LLKEIPQVNFTLHSTAIFFDKHGNPPTGYDILNWQWKSNGNPTPEFRLVGEYRAQRKEL  
LINTSLIKWNTLQNKVKCASSSFHPLPPAQ

>Cm-TAS1R7\_SINCAMP00000011640\_837 11754 SINCAMG00000007614

MLASLVLVGHNGAEPQGSDDRRVGEYLAPGDYVIGGLFPIYSSKLDLQSVNKSEHISCE  
SFYPQGYHHLQAMRFAIEEINNGTELLPGVRLGYEYNTCFESTVAIESAIALLSNSEQ  
DSIEVTCNYTEYNTRVVAAGIPSQSELSIVVARLFSFLLLQVSYASSNVLSNRRNFPS  
FFRTIPTDEVQADAMASIVYMFQWNWIAIIGTDNDYGRQGIELFSVQASKRKICVAYE  
DLIPLHLTGVQFKAKLVSIVNNINYSKINVTIVFCDDRFALALIDTVLQLNITGKVIWA  
SEGWVTSTSFQTLTNVASIGTILGVAVKGTGNMPGFDQYVLAEDPGSCINPTPTEICHDS

KKLHTELA AQDCLSHFVQTHNGVVDTPQQRITFNVYS AVY AVA HALHALLECD SGSC  
CKKKS IYPWQLLETLAQVNFTLNGHDIYFTPNGDPPTGYDIVNWHWNGK DQEPEFR  
KIGEYRALWKELDINVSQIQWNTPGNQIPVSN CSTSCKMGQVRMLKGYQSCCYECV  
DCPKNTFQNQSTLQLNKCIACRS DQWSKERSVECHNKSIAFLEWTDSP TIVLSTMAVL  
ALLVIISAVAI FIVHFHTPIVQFAGGSLCFVMLVSLAISCCSIFCFVGCPTQLSCTIRQPIF  
NIGFTGCLSVMLTRAFQVGS LCGTSSIPPTLCPKLI IASMKYLVVAFIIMCPAALCTWQ  
FSLPPTVLNNYNVSETQIVVECS ESSLGFLLVAYNALLGLACFLCTFMGQRS GQAY  
NLARCIMRSTLIYFAAWIFFIPTYTSFSGKLVPCIQMSTGMIS IYGILVAYFIPKCYIILFK  
PEYNTQSNFQSSPDNLS

>Cm-TAS1R4\_SINCAMP00000011665\_834 11779 SINCAMG00000007628  
RCLQASEVMWLLLA VVLC LVAQAANTS NIAAAFS LPGDYVIGGLFPIHYAQPNGV NQ  
SEPITPDCQRFPFYM NMYVNSQAMRFAVEEINSDRLLPGVRLG YNIADTCFQSVDV  
QTTLHFLSARHL PSPGIPTPATNTDYQPGVPISSNYTSYQP NVIAIIGPASTTITVTIARFL  
GYFLVPLISYAASGEVLGNRIRFPSFFRTIPNDIKQAEAMALLIQEFGWNWIAAVGSDN  
EYGRQGINKVVELVTGAGTCVAYQAIIPSSRPELVHMLNEISASVNVTVL FSSRLATE  
RLFRVLTELNV TGK VWI ISETVALSEDIARIPGVAAVGT VLGIAIKEGHMEGFREFLAK  
GAASEPRGSCDQE CRLLAPAGRSAESPEYHVDTRVSYNVYVAVYAMAHALHQLLQ  
CEQDRCYHPRAVY PWQLLSSLK KVRFLLSNETFYFDETGDGPGS GFDIVTWQSQGHGI  
HFQTIGSYLPLTHQLDIDRSLIHWPHNSTYVPVSHCSESCGPGQRRIPRGFHSCCFDCE  
DCPAGTFRNQSDPYECAACPWWQWSPAQSERCLDRAVQYLSWQNPLTV LLLLLAAN  
SGLALTVTISV VFAWQLDSPVVK SAGGRMCFAMLASMLCGFSCVYLF IGK PSTTLCR  
VQHPIFAISFSLCLSCILVRSFQIVSIFKMASSLP RAYKFWLRYSGPGLFVVLSTALQLT  
MCVAWLVAEPPSPRTLLTGSIIALDCSTGNVAGLALSFLYIVLLTGACFL LAYIGRDL P  
ENYNEAKFIAFSMTLCFVYYILYMASLVTPTQQVYTSSIRTFLTINSAASVALGYFLPK  
CYIILFQPQLNTAAHFQSCL

>Cm-TAS1R6\_SINCAMP00000015252\_829 15393 SINCAMG00000009929  
ILPLKSHVLCVAHSGEWDSSSTDFELPGDYILGGLFPIHTEAFSTLSRPIVPTCKNFLR  
ASYCIFQAMRFAVEEINNATHLLPNITLGYQIFDDCTSS IYIKAMFAFVLRRAQTSSGA  
THNL CGYQPRVTAIIGPWSSDGATIVANILHPFLLPQISYGASSEKLS DKVYFPSFLRTI  
PSDKNQAEAIILLIQRFKYDWIAVVGSDDQYGYGQYKHEVTTLASERNICMAYQGIKA  
KEGTLKEAIIQVIKHIDSSRVNITVLFATLQLTVMYFQTAIELNIRDKVWI ISEAISANNI  
LSEIPNISKVGLILGIAVREGQMPGFQDFLSNALAAQSLSPSNLSQASAESCAQTCIECQ  
SFTNAMVQSILGSNKWGISFNVYS AVYSVAHSLHQLLNCDSGTCNKSR TFLPSELLES  
LKRVNFTLHNRTINFDANGNLR TGYNIIIWENKSSIDPFRVIGSYTPNPGRV VINQPFNT  
WAPGLKKMPTSKCSSECEPGQRKNLDGFHHCCFKCTDCPKNTFESNHDCVECFKWQ  
WAPSKSSVCYNKTIVYLRWEDGISIALCAMAGAGILAKATITVIFIVNLKTPIVKAAGG  
KLCFVMLLALVSGSSCVFAFIGLPSELVCKVRQPVFAVSFTVFLSCILVRSFQLACIFK  
MASRLPKAYAYWIKYNGQYVFVLLSTMVSVFHSLMLLINHPSSFMRRDSLSDLELIL  
HCNSDLFIVFLKSYIYNILLSLLCFLFAFLGKDLPKNYNEGKWISQSMVVFIFSWSLFA  
LISFSASQRYIPIIQAVVILSSSYGIVGMYFIPKCYIILFKPQQNTNAYFQMCIQEYTKRR  
ST

>Cm-TAS1R5\_SINCAMP00000015092\_821 15232 SINCAMG00000009827

AMQCVVLMALSFAAQGWAVGEGWSSTLGGEGRLPADYVIGGLFQIHMEAQSDWSK  
PEIPKCESFSADGYQHFMRFAMAEINNSTSLPNVSLGYEVFDDCQINIDTLASFAF  
TRAPRCSHHPAAVA AVIGPWQSQAIIATILGLDLIPQISYGATVELLSDKRSFSPFFRTI  
PSEETQIDAILLIRRFQWNWISVIGSSNQYGVNGKLVIA GALANGICVAFQGTIPEH  
GLDSEREIAEIVGNIMHSRANAVVVFSEIVSAELFFRVA VGRNVTGKVVILSEDVSLQ  
RLLSDIPNIWKIGTFLGIGVKRGQTDAGYMQFVQEA VYENLRYSELQNVSRASGDLT  
CGPINHRNLSIPSESLRLVLGYLDWRVAFNVYTA VYAVAHALHQLLQCNTGECNRST  
EVYPWQLLEALHAVRFSLHNTSVYFDRNGNPPMGYDIIHWA WNNQSVSFRVIGTYT  
SSPRELHIDETA IWHSEGNTIPTSNCSNECEPGQFKEIVGFKACCFCTCKDCPAGTFQN  
QSVCTACEPSQWSTTRS VVCHNR TLL YLSWGSNISIALGALS GAGILLIAGIAALFVAN  
LDTPVVRAAGGRLCLLVLASLACVYGSACL SIGKPNAAVCRVRQLVFGVSFTLCLSC  
LLVRSFQLVCIFKLATRLPRA YDYVVKYGGQYVFIAASTAVQFVFLIWL LDCDPGKM  
QPNYSFSETKMLLECANSTLL YVLLSNVGLVLLSLLCFSLAY WSKDLPKNYN

\*\*\*\*\* Lepisosteus oculatus (Spotted gar) \*\*\*\*\*

>Lo\_TAS1R3 XP\_006642093.1

MEVMLRMLFLPSVLWTSPTADPLHWLKNISTDLFRSPGD IILGGLFPIHELTSNLSERS  
QPDDVYCDRLNTYGLSRALVMKFAVDEINNTPDLLPGTR LGFEVYDSCKQASVIMRP  
TMLFLSEKHSRGIRVLCNYTGYSTRVLA VIGPSTSEMVSITGKLFSFFLMPQISYGATS  
EKFSDKMLFPSFLRTVPSDKLQAEAMVHLVLEFGWNWIA VVGSEDEY GKQGV LQFS  
MLAAQQAICIA YEALIPYSDPREA VDDILNRINQTKAGV VVFLFTLVA  
TKALFSQVIQKKMKAVWIGSTAWALSE DITTIPGIQT VGTLLVFSNKNTQLSHFEIYA  
QQLFTLLEQERLQANSLDPPTSPSATETEFPLPEPCDCWNLSQANMTMIREPQLQRT  
AFSVYSSVYSVAHALHQLLGCSATLCRRKDAEFFSWQVLEVLK KVSFTINNTKVTFD  
VNGNPSIGYEVL TWRWDRDVLRFQNI GTYEGKLV LNR  
SLIHWHTENSQVPNSTCSPNCTAGQVRRVKGFHSCCFDCIDCKE GTFQNNTEDFQCT  
DCPDRQWSTLRSTRCTDPTYHYL KWNQYESLGLILGAVL VLAGQA AVGVFLRHRG  
TPLVQASGGPLCGVALLSLTGGCASLSLFLGKPGDA VCRLQQPFNAFFPA VALSII LAI  
SLQVIYVTEFFPGVTPSRLDSL RGPWSMVVLT LCSVQAGLCGWFVQEGRPLSEYVSR  
MRITFVETFLRCEVEPMVGFGLMYGFNGLLALISFMCTFMAQKPAKQYNLARDITFS  
TLAYCVVWVFIPIYTGLGEMNKSLAQMAAILLSNLGLVAA YFFPKCHLLLTHPELN  
TVDYFRTYLEGAPPPQDQGEQ

>Lo\_TAS1R2 ENSLOCG00000005180

MSEGDSAGESIHGKPSVIGSFFTRLGQIYQSWLDKSTPFAA VRWIVTLILTIYMIRVYI  
LQGWIYIVTYALGIYHLNLFIAFLSPKVDPSLMDDAGKLGRFGIILDDGPSLPTKQNEEF  
RPFIRRLPEFKFWHSATKGVVIAMICTFFEAFNVPVFWPILVMYFIMLFCITMKRQIKH  
MVKYRYLPFTHGKRTYRGKEDTGKTFARSKNIRAVIQKTFELFKLNFLPSGYQQLQV  
MRFAVEEINNSTSLPNVSLGYEIFDYCSRTQNFP AVFDLLSTNGSVPTYGATSTQLS  
DKIKFPSFFRTVPSDKHQVGLIVRLLRMFKWNWVAFIGGSDSDYSRDALQFFSEEIPSA  
NICLAYQGTVTRTAPEIDEMIDVIDDLQIGVIVLFAEQSDVTLFIQQA VKRNVRNKVWI  
ASEAWSLNQQLLSSAGIDSIGTVIGITIQGLGTLPGFKEFVSRTMTRRKTQTCPSEQRV  
SPMETCNQLCPQCSGVTPQDIINEDPTYSFISIYSAVY AIAHSLHQALQCSVNGCSGSGP  
VYPYMVFEKLVKVSFTLYGHTIEFDEYGDPSPYEIVVWDKTSPELFFKIGSYSPQTQ  
PEFILNKSLIHWHTNGVVPVSVCSPECPLGYKKSQVGHHECCFECEACPNGTYVNYT  
ADPSTCNKCEVDEWAEEGSSYCQKRILVYLDYTELLSIGLMLSASFLISISAAVAIVFA  
CSFNTPVVK SAGGKMCFFMLGCLTVSCCVFFYLGIPGREKCLLRNPVVFVYTA CLS



CLAVRSFQIVCIFKMAAKLPKAYDFWVKHNGQWLTIMSCVGIQVILCAIWIGVEGPQ  
PLNNTATYEDQIIFHCSMGNEVAFNIVIMFVGFSLIACFISYMGTDLPKNYNEAKSITF  
SLLIFFLSWISFLTAYMVHKGKYYIQAINAISVLASLYGIVFGYFIPKCYIILYKPEKNTTA  
HFQTCIQNYTQRISSM

>Lo\_TAS1R4 ENSLOCG00000005211

MRFAVEEINNSTSLLPNVSLGYEIFDYCSDSHNLQAALDFLSKKLTRVIPVVDRITEYL  
PKVLTVIGPFGTTESLVIAPLFGSYGVPMISPGASSRLSDKINNPSFLRTIPSDKNQVR  
VIIQLRRFNWNWVAFVVGSGDDYSNDALREFDKEARLVGICVPYQTTLPQDTSKIGA  
LFDSIATVNVSVVVVFSTRIYAIPFIKAAVANNVRDKVWIASEAWSMNEELARMPGID  
TIGTVIGITGGLAPLEGFEFVRKTLAHRDGEICSDSSRSAVEETCNQDCPACANVTL  
ENLLSPDPSYRLRVYSSVYLAHALHQLLGCDAYCRRSDPVLPHMVLKLLKTVNF  
TLYGRTIKFDVNGDPIPSYDFVVDWRTSPRFYKKIGSYTSDPEPIFVLNASLIRWFSNG  
TVPVLTCSAECEAGYRRTSTGAHSCCFDCEPCLNGTFVNHTADPYKCVKCETDEWSE  
NGSSCTKRSQEYLHYTDLVSIGLFLSATILISLSIAVGAVFVWNRNTPVVKSAAGGKMC  
FFMLGCLIVSCTTIFSFHGVPHGWTCMLRFPVFTVFYTAACLSTVRSFQIVFIFKMAA  
KLPKAYDFWVKHNGQWLTIMACVAIQIILCTIWIGVEGPRPFNNTVAYKDQIIFQCSL  
GNLYGLFTVTSFTAFLSILCFGFSYMGTDLPKNYNEAKSITISLLVLFISWISYFTSRMV  
YQ GKYLEVINAGSVLSTLYGILLCYFVPKCCIILFKPDQNTPAHFQSCIQNYTKTISTK

>Lo\_TAS1R1 XP\_006642104.1

LGSVSELCWDLAAAGQFGPLSQFQLGGDYVIAGLFPPIHNTGMSDKSVPELDDCQNGI  
FNKHGYHLMQAMRFAIEEINNGSGGENLLPGVTLGYQIYDICSEPASILATLDVLVQQ  
YEYNREPESPSTRTRAIAVIGPDSSSYAFTSAATLGYLIPEISYEATNEMLSNKQLYP  
AFFRTIPSDRNQVRAMVQLLVRFKWTWIALLGSDNDYGQQGVQSLSELA SEYGICIA  
YKGIQTYTDSRREMLQMVR SIVDTRVNTIVVFSSKRIASGFFPLVVGQNVTKVWI  
GSEDWSISTRVSGLPGIERIGTVLGISTKTATLPGFEGFEALTVEKTRRPVANESEDERQ  
RALGCLQGSDAFGTLTPGEVPLKEFDVQSSFNVYKAVYALAHALRSLLDCDSLACSR  
VEALPWRLLEKLRQVNFVSGSEPVYFNEHGDPPAGYDIMA WDWAGGNLSLRLVGM  
YSPDPENLDIDASLINWNTGRESFSWSSPQVPESVCSPECPEGYRRLQTGAHACCFDC  
QACPPSTFLNRSGYTFCQPKQREWSLPESEHCVNRTVVYLPWEDSLAVALLVSLVL  
TLLLTLATALLFLLHLNTPVVKSAAGGKTCLLMLASLAGATCSSFCHFGVPSGLGCAL  
KQPLFTFGFTVCLSCMAVRSFQIVCIFKMASKLPRA YEVWARKRGPQAVILSSSVVAL  
FVSL LHVLLARPVPTEVYNIYPDTIILECSGMESVSSILQLVYIAMLSFLCFAFSYMGK  
DLPANYNEAKCITFSLLIY LISWLTFFTVYIISRGKYLIVVNVMAILASVLGILGGYFMP  
KVYIIVLKPQMNTTAHFQNCIQMYTTKKS

>Lo\_TAS1R5 XP\_015222794.1

QIVTTMKG FVILFNILPLSFLKANGGNVCGLSDFRLHGDYILGGLFKVHVDRKFNHVVH  
SKPEAVQCREDFDSASGYQELQVMRFAVEEINNSTSLLPNISLGYEIIDYCSDFL NFM  
VAFDFLSTNFTGSLYVTKYFKDYQPKVTALIGPFGSTENILSPVF MAYLLPVISHGASS  
ILLSKQRYPSFLRTIPSDRNQVRAILQILHRFGWRWIALIGGND DYSRNLQALKEE  
MSPYDICVAYESTIPTG PAMGSLFSNITILKINVVIVFASKVSAVPFIKAAISNKISDKV  
WIASETWSLNQQLLQDTQIHTIGTVIGITIKVVALPGLREFVHSTMTRGWNGTVCVNSP  
HIGTWETCNQVCSECSSTDPQSIAD EDPMSFSIYSAVYAVAHSLHQFLGCDAEGCRK  
SGTIIPYQLLQTLKNVNF LNNRTVSFDKNGDPAPNYGIVVWDKTLPLYHREIGSYVS  
DPSIAFHLDEELIRWHSNGTVPTALCSLECKEGHRRKVSGVHTCCFDCEICPNGT YVN  
KTDDPYTCQSCEDDEWSDYGSTHCKKRTLEYLHYNEGISIGILLLAGLIFLLSGAIAIV  
FARHHDTPVVKSAAGGKMCFFMLSCLSVCSLSIFCYFGWPQREKCTLRNPVVFVYTA  
CISCLAVRSFQIVCIFKMAAKLPKAYDFWVKHNGQWLVVATAIVLQILLCGVWIGSQ  
GPRPFNNSALFKDQIIFDCNMGNLYTFVTVIAFVAALS VLCFMFSYMGTDLPKNYNE

AKCITFSLIFFFSWILYLTAYMVYQGKYIAAINAFSVLASLYGILLGYFTPKCYIILFKP  
EHNTPAHFQNCIQSYTKKISSE

**OR**

>Sc-OR5\_sf64790

NGTTEYLDCPSWVLLPEGICLMFTLLFSGAMLDTIFRTSVLRKEPRHLLLASLLISDL  
VYLSLLMATTVMWAAVINMPILLCLINYMLVFSSFISGFFTVTAMAVDKYIAICWPLH  
YRSICTSGKTQKIIILIWGLAMLYPSVCLLMLLVARSPMLVMESFRCVFPPVEEGILGTS  
FALFQIQQAVLALTFLVSGVTIVFSYCMYKEARQTSVKVRARRTVLLHGLQLFLYFIP  
VANYIVFSNLVKNRAIKVEVITQLHLINISLFSILPRCLCPVVFGRKELYHHVKKRL  
GS

>Sc-OR4\_sf107796

SVTSFVLLAFFNLVIDCTILSEDRLRSQARFVLLFHLLVSGLIYFGLSSTFYLLIYLGAV  
MSAASCLTLLFLMISGSTILLTLTVMAVDRYLAICHPLKYSSFCTQSRVWALSSLTW  
VVSAAIPLALVSQHMMSEPLPGSTRCEASNLSYNMKQTSKILLICICTVLILYSYY  
KILAEGRRIGVMNRRNKRARSTILMHGVQLAVYIIPFINFILHLVAQAGKLDPGTKSL  
FEVLNFAFFSLAQCVPVIYGLRKEELWERTSRRFPCC

>Sc-OR6Ps\_sf60367

LNIFLISLALCLVGTLLANPLLLMVILLKKSFRRETRYLLANILVADLIFLFLNSFIAISI  
AVQQCMPSLLCDFLVIGRTISDFSSVLTITVMAIDTYIAVSLPLRYVAIIHPSRTVKLVI  
VIWILASVYPFILLTAILAKQPALSHGHKMCLMLLSPNMCPSRQFILGINIFLVFSVLIC  
FLLVLYCYIMLYCKTRGSGIWDLSNSRARVTLLIHGIVLFLYFGPCLIFSLEIVFSDSHLI  
NASTRMWLYNINIHVFMMPRLCPYLYGLRYRELAEAVKRLFIIGRHRVHAMNR\*G  
PH

>Sc-OR8\_sf77397

ERCDSYKVVHPLGEDVVTVQFSANVSHPEDVYLQYNAIQAWVAMGHSKTDILMIP  
LVVCLFASLLATPLVLLAIFSNNNLCQETRYLLANTLLNDLIYSILNTFIDILNAAGVG  
MPKVVCETLLYVLTVVYCNGILTVTATVVDTYVAVGWPLRYTSLLPHTRTIKIICIWI  
ISAVAPTVIYIITLGEQNPSTLSICILPLIFVLSILHTPLLKIYYSFTIIFLILISSCYV  
MLYCKTKASGIWGGNSRARHTYVIHSVLFVVFYFPLLVLVAGTALQELHLVSYMTGL  
WISLSMTNMLMMLPKAVSPYVYALRYREITKTIRSLSMLRHVRRINPT

>Sc-OR1\_sf95708

LLVYMVIIAANLTIMYLVKTTETKLHGPMYYLLCLLAGIDIILSSVTIPKILAMYSLQSM  
VISLEACVTQMFFVYCTALSESTLLVAMAYDRYVAICQPFNYHKLKLHYVLLAVALII  
FLRAMCFVAVATLLTQATYCGSNFIQNCYCNYGSLSKLACDGVTVSDAITYPLSFLIT  
LPDSSLIISYFKIFKVAFYTGQGEARTKALNTCTSHCCVLILFYTSALFEFTMYLIPSIFS  
PELHFVAVTFAIFQIPFNPIIYGVRTKEIRKSFLKLLGRGRIA

>Sc-OR2\_sf63828

QRRYPVTGFILVGFPGQQELQAQLWALFLIVYMLIVLGNVSVVCMVTTDKRLHAPIY  
FLIANLAAMDVLLTSSVIPGMLVRVILDTKfirWNNCFVQMYFFHSMLAAKIFLLTV  
MAYDRFVAICNPQHLYLLTRDASFVKLAGFTWVLGLTIFLPPVVLTSIFPFCGSNEVY  
NCFCELLSVTSLICTDTISVTFLNIVLNVLIVFSSFATLVWVYIKICKSFKILSREQKRLV  
CTCVGHLLILSFFPSLALYFALFYFGYSSSIHVTSAMVYVTASPLLSPIIYILAAKGIRE  
KILQLIRVRKV

>Sc-OR7\_sf24603

ESCTFFQQNRMNLSKCENYYSFNEMSQLGEEMIPVQYSTTSPNLTELCDLYNLLQELF  
LNMPRWGIDIWIIPPAVGLFASLFATPLVLLAIFLNNLRQETRYLLLANTLLNDLIYSI  
LNTFIDILNVAGVGMPKVVCEtLLFLLTV AHLNGILSITATVVDTYVAISWPLRYPSLL  
PRSRTIKIIACIWILSVSNSFVLFITLWTQEEPFSLLLTCVVPLVLLSSPLGIYLLKSSYGI  
GVLYFLICLILISSFYVMLCCKTKAPGLWVNSRASQTYLIHsvLLIVYFSPLVMMVLG  
GVFFGKQLIRVQSVIWMIVSINNILMLPKAVLPYVYGLRYREIANVIRSFFSLKSVAQI  
RPL

>Sc-OR3\_sf136576

MNSSNETSDYILNVVKTSIYLTDfIVTSMCshVIISTVQQEELKRETRYFLLCQHLYA  
SIYFALCTLTNGLRlFSINSPRILCWILFAFQITFAQCIMLTLTLMSLNACIAICWPLRYT  
SLVDSTNKKITAIMWVLA VQNPLWSTVYQSLNVSLTDIIENDNSCPNPMNGFASRQIG  
IASILLCFTLIVLCYCLiyREGKRAGHFVTSNVQAQKTIFIHGvQLSFFIVPVLITI

>Cm-OR1 XM\_007900043.1

MKCEGTINAACACDRPEIDFPMNVTERSSNVTLTGFCGEPcVNHVLQSFsiIMYILCLL  
FNFLVIFGVFLSRQLKKPMYLLMLNLAITDLVGCsANVCLVFDmFFSgeQFVSKEACF  
VQVFFVYLFGLLcGAITtMAVDRFIAICHpFSYLHIFKwKNILKIMMAVWAVSLVM  
AFVYVGLCVKMLRQPVVVRGLMCDHLSLSNVVQDRLNFDfiYNVFMSVGLILVCSA  
LQCYTYRQIFAEINKSNDCEMAQSSKSKLVKHLFIPLSTYVVGfSMLCVTIVDHFVCH  
PYVINTKVIFQFIYYTTVPVLNPIIYGLHITELRKHLLHFLNTQMvSLFS

>Cm-OR3 XM\_007894823.1

MNISNETSNYLIYPVKTSIYLIDLVCSSTCsYMITRTVQENVILKEDFKYFLLCQYLICT  
SLYFTLGTLTNSFHLFHINSPRVICWILFAVQITFAQSIMLTLTLAFNTCIAIYWPLSYK  
SFVSLAKRKIIAIFWVLSMFNPFWLSIYESWGISLSYVTAKDDTCPNAMDGTVSRIAG  
MVFILLCFLlIVFSYGLIYREGKRAGHFNSsNCRARKTILIIgVQLSLFIVPVLITLALAK  
EDHTTFYLLNVSVFSVAQCLSPVYGLRYKELRNKLIATWFFCCTSKNSDVSQLSGSI  
ASRDASVSQSIQVCNL\*

>Cm-OR4\_XP\_007884734.1

MNQTanATGGQAYTEVRFYASVASFVLLAFFNLVLDsAILTDGRLRSQARFVLLFHL  
LLSGVTYFGLSGTFYLLVYSEAPVSVPGCLALLLLLMTSGSTILVTLTMMALDRFLAI  
CHPLAYDAFCNPRRVWACGLAWLISLVIPLILVSQDEQHGGsRTTTCSSSNLHSSHN  
KRGAFKIFLICsCTALILYSYAKILVEGKRLGVLNRRNTRAWRTIAMHGAQLVvYIVP

AFINFTLQLVAQAGCLRESARELFEVNFAPFSLAQCLGPVIYGLRKEELWEVTSRRV  
PAIFWEVKGTLEWLAPGPEPPPPEAEAEERATSPLETSSLA

>Cm-OR5\_XP\_007892691.1

MNSSHSSILDIVQKENTTLVLKIFLVIITLSLSVATVFSSVVLWTIFKVRILREETRYLLL  
SNLLINDLMYIVLVLVQALVLVTDMPVSYFWCGCNITLLELVTFSCGILSLSAMTVDKY  
MGICWPLHYNSLCLRKRAVVVCGILWAFALLDPVVSFGILTASNTQILFDIIPWCCAG  
TLFTEQLISRSFLVQEVVLGVLLMCCILTVFCYVGIYKEVKVTWERRFVKTNAHK  
MFCLYVFCILLYLLPAVLLFISANGYLLPHFFTEQKAFILELVTVMVIAVLPRCFCPLV  
YGLMMKEIQYLPDLKPRCRANRVNPEVNDEHSAFWNL\*

>Cm-OR6\_AFP10713.1

IAALTYCYSAILTITLMAIDTFLAVSLPLRYISLMPPSRTIKLLIVIWVVASVYPIILLVVI  
LVVESYPEMNHQSCLLPLALDSKTLGNGLVISIHIFLVSGALVCLAVIIYCYVMLYYN  
TKRSGIWDNLYSRARVTLLIHTTLFFLYFAPGLFFAIELMINKKNRLDDRTRVWLSSV  
NSEVFMMLPRMLCPYLYGLRYRDIAKRIKRSFLVKQHSVRSMNAWYISGHGDSQ

>Cm-OR7\_XP\_007887801.1

MTVVYSNTQSSVTDKRSKQQAITRSSRSLSEYLTWDEYSRLLRIIAGDTDKNFCKTKI  
AGHLKVECLQCYRMEHEHCDSYKEIPSLPEEIEIFKNVTNVSSPVDFYHQRNVSDEWL  
DPAIYLKTNFLVISSAICLLTSALTSPLVLLAIFSKSNLRQATRYLLANMLISDLIYSVL  
NTLIGLLNTQYLTMPKEVCETLLYGLTVSYSTGILTVTMMVVDTYVAVSRPFRYTTL  
LSFSRTLKVIWLLSAIAPSAIYIITIKSKHDLLSTLSICILPLIFSISLRIVSSTIFYVA  
VLYFLICLILISSCYVMLYYNTRSSGIWARNRQTYLITILLFLSFFPLLLLATAGILE  
DLDVIGFQSEVWMSLSMSNIFMMIPKVVSPYIYALRYREIATIIRSFSIFRCLNRVPRI

>Cm-OR8\_XP\_007889495.1

MEQHNEATARVNVTHAAKTALTVVKIACTLPLACGSLYCAALMLYTFCSDL SFRESS  
RYILFTYMLLNDAVELVVSVLLFLLSKLHIPIPLGVC SLFVTVSGSAYLSTPVILAAMA  
LERYIAICVPLRHAEICTVRRSAGAIGIICALGLLPHLVELVALSTTHSPRFFSRLAVCS  
KEALITNRFLNLFRTVFAVDFSVVTLTILYTYVKIILEARKASGDQSSISRARKTILLH  
GIQLSFCMTSFTHPITENLVRDQGFLLRSWVIYANFFLFILLPKALSPVIYGLRDEAFRK  
KMKKHFIKCRSSKIKPTVLST

**Dataset S3. Phylogenetic tree files in Newick format for olfactory receptor families OR, TAAR, ORA/V1R, V2R, and TAS1R in catshark (Sc) and elephant shark (Cm) with reference species and outgroups.**

## Treefile 1

### Fig 1a, Fig 2

((((((((((((Dr\_OlfCu1:0.5710691046,Dr\_OlfCt1:0.4346949657)0.9998500075:0.0918117901,(((Dr\_OlfCv1:0.0509270682,Dr\_OlfCv2:0.0561572157)0.9998500075:0.1511422294,Dr\_OlfCv3:0.1842365509)0.9998500075:0.3892477108,((Dr\_OlfCx1:0.0702470909,(Dr\_OlfCx2:0.0562208175,Dr\_OlfCx3:0.0620518308)0.9957376553:0.0374663756)0.9998500075:0.5638466571,(Dr\_OlfCs1:0.1016018166,Dr\_OlfCs2:0.1006490601)0.9998500075:0.4283588083)0.8858486190:0.0626443156)0.9424241872:0.0432439831)0.9960970297:0.0449300076,((CmV2R5:0.2163790013,CmV2R6:0.1976943426)0.9998500075:0.0606807891,(Sc-V2R5:0.2033443332,((Sc-V2R6:0.2226350367,Sc-V2R7:0.2048035253)0.9716777266:0.0253732240,(((Sc-V2R10:0.0136517262,Sc-V2R11:0.0189031262)0.5340636717:0.0027373209,Sc-V2R9:0.0239234000)0.9998500075:0.1657862342,Sc-V2R8:0.1617100985)0.2350029124:0.0052379888)0.9998500075:0.0438127404)0.8230883394:0.0234602237)0.9998500075:0.2050277606,(CmV2R4:0.2750821389,Sc-V2R4:0.1817746087)0.9998500075:0.2790873028)0.9978093169:0.0429688414)0.9998500075:0.0413776870,((((((Sc-V2R19:0.0514926055,Sc-V2R20:0.0080244226)0.9780801581:0.0206957546,Sc-V2R18:0.0316956034)0.7400555866:0.0293076750,Sc-V2R17:0.0972826846)0.9998500075:0.3771653038,((Sc-V2R21:0.2967428082,(Dr\_OlfCn1:0.4720665487,Sc-V2R22)0.9887440523:0.0869714994)0.9998500075:0.0735815685,(((Dr\_OlfCk2:0.0699419865,(Dr\_OlfCk1:0.0782701593,Dr\_OlfCk3:0.0807532887)0.9938865264:0.0277622153)0.9998500075:0.4355526503,(((Dr\_OlfCm1\_5:0.0965882275,Dr\_OlfCm2:0.1011722233)0.9998500075:0.3294537754,Dr\_OlfCj1:0.4048442389)0.9744000137:0.0437014049,(((Dr\_OlfCe2:0.0478912728,Dr\_OlfCe1:0.0150197564)0.9998500075:0.2446315546,Dr\_OlfCf1:0.4023292406)0.9998500075:0.0627576386,((Dr\_OlfCh1:0.3785010331,(Dr\_OlfCg8:0.1441281636,(((Dr\_OlfCg3:0.1560262461,Dr\_OlfCg4:0.1455047698)0.9978756632:0.0176862829,Dr\_OlfCg6:0.1591690440)0.9366668208:0.0098961970,(Dr\_OlfCg7:0.1263335096,Dr\_OlfCg9:0.1513002594)0.9998500075:0.0330818526)0.9998500075:0.0116487278,Dr\_OlfCg2:0.1599381454)0.7646090333:0.0164215832,((Dr\_OlfCg12:0.1596710352,Dr\_OlfCg11:0.1235977975)0.9998500075:0.0284380529,(Dr\_OlfCg10:0.1482323317,(Dr\_OlfCg5:0.1198790492,Dr\_OlfCg1:0.1277607402)0.9998500075:0.0178146606)0.9067860650:0.0043983437)0.9856951577:0.0126474641)0.9998500075:0.0496160483)0.9998500075:0.2837360568)0.9985395077:0.0571089198,((Dr\_OlfCd2:0.1332548730,Dr\_OlfCd3:0.1081949252)0.9781000457:0.0247540836,Dr\_OlfCd1:0.1018649633)0.9998500075:0.2558881897)0.9998500075:0.0489160936)0.9998500075:0.0542464955)0.5967121282:0.0266626296)0.9998500075:0.1831011374,((Sc-V2R30:0.4786349063,Sc-V2R31:0.2661765270)0.9998500075:0.3137314180,((((((CmV2R26:0.0457509841,((CmV2R30:0.0520939254,(CmV2R31:0.0254817343,CmV2R32:0.0380061837)0.7598498789:0.0029502815)0.9998500075:0.0256203334,CmV2R29:0.0262572799)0.6540379705:0.0017113015,(CmV2R27:0.0447453516,CmV2R28:0.0177792197)0.7828282775:0.0014249864)0.9998500075:0.0630665816)0.9998500075:0.0395499681,(CmV2R23:0.0923756791,(CmV2R24:

0.0769444366,CmV2R25:0.0564981906)0.9998500075:0.0368368253)0.5430997306:0.0142  
131888)0.9977241092:0.0202170740,(CmV2R21:0.0346837001,CmV2R22:0.0301667542)0.  
9998500075:0.0713351898)0.9998500075:0.1646018234,(CmV2R33:0.2075794724,Sc-  
V2R32:0.1523771641)0.9998500075:0.1657562889)0.8889095208:0.0272538672,((Sc-  
V2R33:0.0000004758)0.9998500075:0.3662807752,((CmV2R34:0.1913644241,Sc-  
V2R34:0.2465661348)0.9998500075:0.0603035198,(Sc-V2R35a:0.0286425676,Sc-  
V2R35b:0.0000435760)0.5086884536:0.3140085450)0.6769470756:0.0183283995)0.865146  
2458:0.0129712358)0.9998500075:0.0293469714,(CmV2R19:0.3618479746,CmV2R20:0.27  
81836187)0.9985162507:0.0384018262)0.9998500075:0.1015628407)0.9200955078:0.0198  
355604,((((Sc-V2R28:0.0133170320,Sc-  
V2R29:0.0645516782)0.9998500075:0.1454524182,Sc-  
V2R27:0.2836764813)0.9949126194:0.0343391879,Sc-  
V2R26:0.2315915686)0.8671397127:0.0172141658,(Sc-  
V2R25:0.2282600843,((((CmV2R17:0.0941864146,CmV2R18:0.0797776766)0.980265887  
4:0.0072014480,CmV2R16:0.0665279561)0.9998500075:0.0123165413,CmV2R15:0.07355  
40592)0.9783428366:0.0119890923,CmV2R14:0.2031085825)0.9830377632:0.0157010884,  
CmV2R13:0.0575629521)0.9998500075:0.0944307608)0.9855365978:0.0301176050)0.9998  
500075:0.0620398656,Sc-  
V2R24:0.2754672851)0.9998500075:0.0315517161,((CmV2R12:0.1653217273,Sc-  
V2R23:0.2539136333)0.9998500075:0.0759159465,CmV2R11:0.2432857102)0.9484713527  
:0.0265679585)0.9998500075:0.0953242073)0.9998500075:0.0670038129)0.9998500075:0.  
0649276921)0.7645208638:0.0359023437)0.9983779077:0.0322997855,((Sc-  
V2R15:0.2989597205,Sc-  
V2R16:0.8060354862)0.9998500075:0.1920190182,Dr\_OlfCw1:0.5120292269)0.989605676  
3:0.0510798481,Dr\_OlfCr1:0.7725929146)0.3856636692:0.0560116894)0.9998500075:0.04  
47561098,((CmV2R7:0.3595514183,(CmV2R8:0.2219147909,Sc-  
V2R12:0.2002999548)0.9998500075:0.1832142561)0.9947199484:0.0237798510,(CmV2R9  
:0.3875962511,((Sc-V2R13:0.1644949832,Sc-  
V2R14:0.1906643398)0.9998500075:0.0697428755,CmV2R10:0.2863194487)0.9998500075  
:0.1308343700)0.9998500075:0.0460104672)0.9998500075:0.0327121117)0.9927999450:0.  
0237755030)0.9998500075:0.0425884929,((Dr\_OlfCq12:0.1225373865,((Dr\_OlfCq13:0.140  
5851677,((((Dr\_OlfCq16:0.0940498501,Dr\_OlfCq17:0.1068213788)0.8982833659:0.00683  
00602,(Dr\_OlfCq20:0.0843801547,Dr\_OlfCq18:0.1291554993)0.9998500075:0.0215727187  
)0.9998500075:0.0101711022,Dr\_OlfCq19:0.1305645112)0.6162286468:0.0087172988,((Dr  
\_OlfCq6:0.0245848118,Dr\_OlfCq8:0.0293029517)0.9998500075:0.1245224984,Dr\_OlfCq14  
:0.1533086275)0.9989936397:0.0140367893)0.9522582859:0.0107332569,Dr\_OlfCq21:0.10  
96329196)0.9998500075:0.0166701450)0.9985490252:0.0147792344,((Dr\_OlfCq11:0.15214  
34222,((Dr\_OlfCq4:0.0105912641,Dr\_OlfCq5:0.0046253092)0.9998500075:0.0461210556,(  
Dr\_OlfCq9:0.0288825788,Dr\_OlfCq10:0.0160351147)0.9998500075:0.0138371912)0.99985  
00075:0.1046714619)0.9998500075:0.0599922406,((Dr\_OlfCq2:0.1654226493,Dr\_OlfCq3:0  
.1276338457)0.9998500075:0.0235919450,Dr\_OlfCq1:0.1550527841)0.7015540948:0.0141  
429032)0.8822767675:0.0178912471)0.9797528716:0.0322700918)0.9998500075:0.515133  
7912,(CmV2R3:0.1398422441,Sc-  
V2R3:0.1602906163)0.9998500075:0.1900435967)0.3697207315:0.0380673396)0.99985000  
75:0.1214383004,(((Mm\_ENSMUSG00000090762|ENSMUST00000163852|Vmn2r56:0.036

4053135,((Mm\_ENSMUSG00000091045|ENSMUST00000172743|Vmn2r55:0.0612498276,  
Mm\_ENSMUSG00000096593|ENSMUST00000086210|Vmn2r54:0.0192714958)0.9998500  
075:0.0206257426,Mm\_ENSMUSG00000096002|ENSMUST00000170412|Vmn2r53:0.0414  
770817)0.9998500075:0.0332786068)0.9998500075:0.6647601762,((Mm\_ENSMUSG00000  
072778|ENSMUST00000100968|Vmn2r27:0.1774018498,(((Mm\_ENSMUSG00000095486|  
ENSMUST00000170808|Vmn2r22:0.0161126633,(Mm\_ENSMUSG00000094145|ENSMUS  
T00000172199|Vmn2r20:0.0084538047,Mm\_ENSMUSG00000093820|ENSMUST00000163  
607|Vmn2r21:0.000000681)0.9998500075:0.0246606529)0.9998500075:0.0863369646,Mm  
\_ENSMUSG00000091260|ENSMUST00000073948|Vmn2r19:0.1129172067)0.9998500075:  
0.0410351154,(((Mm\_ENSMUSG00000094672|ENSMUST00000162046|Vmn2r25:0.01699  
96765,Mm\_ENSMUSG00000096630|ENSMUST00000032238|Vmn2r26:0.0342129103)0.99  
98500075:0.1036705641,Mm\_ENSMUSG00000072780|ENSMUST00000075095|Vmn2r24:  
0.0963730781)0.9998500075:0.0275806830,Mm\_ENSMUSG00000091620|ENSMUST0000  
0172391|Vmn2r23:0.0930451094)0.9276026307:0.0157519576)0.9998500075:0.0697337074  
)0.9998500075:0.6597828083,(Mm\_ENSMUSG00000091794|ENSMUST00000165928|Vmn  
2r18:0.6661763308,((Mm\_ENSMUSG00000090655|ENSMUST00000165781|Vmn2r120:0.4  
066764865,((Mm\_ENSMUSG00000066372|ENSMUST00000044583|Vmn2r65:0.297083792  
2,(Mm\_ENSMUSG00000091239|ENSMUST00000165771|Vmn2r76:0.2617833196,((Mm\_E  
NSMUSG00000090949|ENSMUST00000164996|Vmn2r77:0.0531319152,(Mm\_ENSMUSG  
00000091962|ENSMUST00000170835|Vmn2r78:0.0289178405,Mm\_ENSMUSG000000903  
62|ENSMUST00000164462|Vmn2r79:0.0363556840)0.9998500075:0.0330573004)0.999850  
0075:0.0855579384,((Mm\_ENSMUSG00000090436|ENSMUST00000167830|Vmn2r75:0.0  
880991089,(((Mm\_ENSMUSG00000051877|ENSMUST00000063425|Vmn2r72:0.0779631  
497,Mm\_ENSMUSG00000096861|ENSMUST00000061074|Vmn2r68:0.0412116832)0.9857  
913231:0.0122349341,Mm\_ENSMUSG00000095664|ENSMUST00000168730|Vmn2r67:0.0  
298426834)0.9998500075:0.0661329275,Mm\_ENSMUSG00000070458|ENSMUST0000007  
7478|Vmn2r73:0.0832431677)0.9998500075:0.0166084150,((Mm\_ENSMUSG00000090806|  
ENSMUST00000168230|Vmn2r70:0.0576139731,Mm\_ENSMUSG00000090774|ENSMUST  
00000166355|Vmn2r74:0.0983928677)0.9998500075:0.0268953773,(Mm\_ENSMUSG00000  
091205|ENSMUST00000172338|Vmn2r71:0.0654245605,Mm\_ENSMUSG00000091006|EN  
SMUST00000171213|Vmn2r69:0.0572174761)0.9998500075:0.0311159283)0.9753468899:  
0.0132282716)0.9998500075:0.0261304337)0.9932998295:0.0148347479,Mm\_ENSMUSG0  
0000094950|ENSMUST00000124773|Vmn2r66:0.0786059710)0.9998500075:0.1481728212  
)0.9998500075:0.1551174589)0.9998500075:0.0584512230)0.9998500075:0.1742410778,((  
Mm\_ENSMUSG00000091504|ENSMUST00000168440|Vmn2r118:0.4046884055,((Mm\_E  
NSMUSG00000091879|ENSMUST00000171841|Vmn2r17:0.0930646561,Mm\_ENSMUSG0  
0000092080|ENSMUST00000165180|Vmn2r16:0.1061252619)0.9998500075:0.0319299218,  
(((Mm\_ENSMUSG00000091624|ENSMUST00000170419|Vmn2r9:0.0344104347,Mm\_ENS  
MUSG00000090961|ENSMUST00000172140|Vmn2r8:0.0298688831)0.9998500075:0.0170  
724283,Mm\_ENSMUSG00000091450|ENSMUST00000164875|Vmn2r11:0.0460874232)0.9  
998500075:0.0472704078,(((Mm\_ENSMUSG00000091375|ENSMUST00000167133|Vmn2r  
15:0.0591788756,(Mm\_ENSMUSG00000090688|ENSMUST00000095922|Vmn2r12:0.0681  
208383,Mm\_ENSMUSG00000091635|ENSMUST00000053253|Vmn2r13:0.0543250740)0.9  
998500075:0.0161976523)0.9642380014:0.0060503171,Mm\_ENSMUSG00000067010|ENS  
MUST00000079163|Vmn2r10:0.0675599149)0.9998500075:0.0168898592,Mm\_ENSMUSG



00000091059|ENSMUST00000170341|Vmn2r14:0.0644227003)0.9998500075:0.037930555  
1)0.9998500075:0.0457773113)0.5567481446:0.0198464251,((Mm\_ENSMUSG0000009151  
1|ENSMUST00000164227|Vmn2r87:0.0335283833,(Mm\_ENSMUSG00000092048|ENSMU  
ST00000171811|Vmn2r85:0.0324308667,(Mm\_ENSMUSG00000092162|ENSMUST000001  
70257|Vmn2r86:0.0140146388,Mm\_ENSMUSG00000070601|ENSMUST00000094502|Vm  
n2r84:0.0244240621)0.9889820055:0.0093804302)0.9998500075:0.0205031256)0.99985000  
75:0.0681705670,((Mm\_ENSMUSG0000000606|ENSMUST00000022438|Vmn2r88:0.052  
7751136,Mm\_ENSMUSG00000072049|ENSMUST00000094491|Vmn2r121:0.0453633922)  
0.9885930031:0.0082337377,Mm\_ENSMUSG00000070448|ENSMUST00000159611|Vmn2  
r89:0.0471463433)0.9998500075:0.0835200901)0.9998500075:0.0474070271)0.9998500075  
:0.3365931096)0.9998500075:0.0657419432,((Mm\_ENSMUSG00000092111|ENSMUST00  
000170322|Vmn2r113:0.1081320100,(((Mm\_ENSMUSG00000091407|ENSMUST0000017  
1996|Vmn2r117:0.0323158028,Mm\_ENSMUSG00000091945|ENSMUST00000168033|Vm  
n2r114:0.0332591525)0.9998500075:0.0140768315,Mm\_ENSMUSG00000091076|ENSMU  
ST00000168175|Vmn2r115:0.0382024220)0.9998500075:0.0323070485,Mm\_ENSMUSG00  
000090966|ENSMUST00000164856|Vmn2r116:0.0702987344)0.9998500075:0.0190787231,  
(Mm\_ENSMUSG00000095093|ENSMUST00000092491|Vmn2r111:0.0217587265,Mm\_EN  
SMUSG00000094921|ENSMUST00000097381|Vmn2r112:0.0355520201)0.9998500075:0.0  
367924785)0.9998500075:0.0947972553)0.9998500075:0.1320581322,(Mm\_ENSMUSG000  
00091930|ENSMUST00000164918|Vmn2r52:0.1543621677,(((Mm\_ENSMUSG0000009034  
2|ENSMUST00000171523|Vmn2r46:0.0087962970,Mm\_ENSMUSG00000095730|ENSMU  
ST00000170922|Vmn2r29:0.0011815639)0.9998500075:0.0314560182,(((Mm\_ENSMUSG  
00000096658|ENSMUST00000174388|Vmn2r39:0.0059585735,Mm\_ENSMUSG000000537  
20|ENSMUST00000066317|Vmn2r43:0.0036639569)0.9998500075:0.0078984214,Mm\_EN  
SMUSG00000094606|ENSMUST00000074943|Vmn2r50:0.0126024508)0.9998500075:0.02  
24272504,Mm\_ENSMUSG00000096399|ENSMUST00000169683|Vmn2r35:0.0344172912)  
0.9998500075:0.0147748498,((Mm\_ENSMUSG00000096373|ENSMUST00000075108|Vmn  
2r31:0.0034692799,Mm\_ENSMUSG00000094098|ENSMUST00000166499|Vmn2r44:0.007  
3045735)0.3761108590:0.0023901664,(Mm\_ENSMUSG00000096691|ENSMUST00000165  
921|Vmn2r33:0.0035814949,Mm\_ENSMUSG00000095773|ENSMUST00000108554|Vmn2r  
38:0.0047850819)0.9998500075:0.0049030903)0.9998500075:0.0079757139)0.9998500075:  
0.0139670961)0.9998500075:0.0214860801,(((Mm\_ENSMUSG00000070844|ENSMUST00  
000142934|Vmn2r42:0.0159492548,Mm\_ENSMUSG00000070844|ENSMUST00000086282  
|Vmn2r42:0.0000000772)0.9998500075:0.0050578631,(Mm\_ENSMUSG00000096180|ENS  
MUST00000108550|Vmn2r49:0.0050161376,Mm\_ENSMUSG00000096743|ENSMUST000  
00094866|Vmn2r32:0.0058162699)0.6397330695:0.0011595960)0.9998500075:0.032805074  
6,((Mm\_ENSMUSG00000091651|ENSMUST00000170402|Vmn2r36:0.0087107257,((Mm\_  
ENSMUSG00000090892|ENSMUST00000168807|Vmn2r41:0.0023918433,Mm\_ENSMUS  
G00000090864|ENSMUST00000171942|Vmn2r40:0.0000000645)0.9934296734:0.00184301  
02,Mm\_ENSMUSG00000095914|ENSMUST00000165611|Vmn2r48:0.0053186743)0.99985  
00075:0.0180530110)0.9998500075:0.0160537241,(((Mm\_ENSMUSG00000070847|ENSM  
UST00000174368|Vmn2r30:0.0286519788,Mm\_ENSMUSG00000070847|ENSMUST00000  
072475|Vmn2r30:0.0000000001)0.8593023304:0.0010908396,Mm\_ENSMUSG0000009410  
7|ENSMUST00000170131|Vmn2r47:0.0073373434)0.9998500075:0.0229104881,(((Mm\_EN  
SMUSG00000070841|ENSMUST00000173459|Vmn2r34:0.0023936113,Mm\_ENSMUSG00

000066828|ENSMUST00000072787|Vmn2r37:0.0050855428)0.9998500075:0.0051605868,  
Mm\_ENSMUSG00000090662|ENSMUST00000164845|Vmn2r45:0.0094623319)0.9998500  
075:0.0238609687,Mm\_ENSMUSG00000058685|ENSMUST00000094863|Vmn2r51:0.0558  
491512)0.9998500075:0.0058388867)0.9938783116:0.0030459180)0.9998500075:0.010003  
6894)0.9998500075:0.0373328509)0.9998500075:0.0821164090)0.9998500075:0.25744439  
06)0.9998500075:0.1595049275)0.9998500075:0.0506952162)0.9998500075:0.1521421360)  
0.9998500075:0.0809621572,((Mm\_ENSMUSG00000091381|ENSMUST00000167976|Vmn  
2r83:0.1341667687,(Mm\_ENSMUSG00000091888|ENSMUST00000165834|Vmn2r80:0.04  
83731965,(Mm\_ENSMUSG00000091468|ENSMUST00000170596|Vmn2r82:0.0398558793,  
Mm\_ENSMUSG00000055515|ENSMUST00000020547|Vmn2r81:0.0308675966)0.9936328  
820:0.0174343007)0.9998500075:0.1699787339)0.9998500075:0.3475803680,(((Mm\_ENS  
MUSG00000090619|ENSMUST00000166447|Vmn2r60:0.0757409695,(Mm\_ENSMUSG00  
000092032|ENSMUST00000168489|Vmn2r59:0.0754350721,Mm\_ENSMUSG00000090383  
|ENSMUST00000171671|Vmn2r58:0.0776464717)0.9998500075:0.0163659172)0.99410916  
46:0.0087788467,Mm\_ENSMUSG00000090967|ENSMUST00000166131|Vmn2r61:0.05602  
36463)0.9998500075:0.0969202893,(((Mm\_ENSMUSG00000091926|ENSMUST000001691  
30|Vmn2r62:0.000000872,Mm\_ENSMUSG00000091528|ENSMUST00000173815|Gm926  
8:0.0095235567)0.9998500075:0.0188556091,Mm\_ENSMUSG00000090751|ENSMUST000  
00163803|Vmn2r63:0.0278188784)0.9998500075:0.0175244860,Mm\_ENSMUSG00000066  
537|ENSMUST00000165029|Vmn2r57:0.0351821414)0.9998500075:0.1225076180)0.99985  
00075:0.0361962992,Mm\_ENSMUSG00000092120|ENSMUST00000169805|Vmn2r90:0.15  
29746736)0.9998500075:0.1112107226,((Mm\_ENSMUSG00000091670|ENSMUST000001  
67382|Vmn2r105:0.1820292613,(Mm\_ENSMUSG00000091656|ENSMUST00000167464|V  
mn2r106:0.1071550632,(Mm\_ENSMUSG00000091805|ENSMUST00000167314|Vmn2r108  
:0.0873036406,(Mm\_ENSMUSG00000091259|ENSMUST00000169559|Vmn2r110:0.05089  
95739,Mm\_ENSMUSG00000090572|ENSMUST00000167093|Vmn2r109:0.0732486670)0.9  
953290521:0.0184333944)0.9998500075:0.0482371035)0.9998500075:0.0307555232)0.999  
8500075:0.0226450232,((Mm\_ENSMUSG00000091859|ENSMUST00000166081|Vmn2r100  
:0.0759805175,Mm\_ENSMUSG00000079698|ENSMUST00000079206|Vmn2r93:0.0895099  
637)0.9998500075:0.0081435631,((Mm\_ENSMUSG00000090315|ENSMUST00000168050|  
Vmn2r104:0.1005315557,Mm\_ENSMUSG00000090417|ENSMUST00000172190|Vmn2r94:  
0.0777526949)0.9998500075:0.0366457078,(Mm\_ENSMUSG00000056910|ENSMUST0000  
0042090|Vmn2r107:0.0848297926,(((Mm\_ENSMUSG00000090304|ENSMUST0000017610  
7|Vmn2r99:0.0637581265,(Mm\_ENSMUSG00000091631|ENSMUST00000166327|Vmn2r9  
5:0.0491449394,((Mm\_ENSMUSG00000091491|ENSMUST00000168710|Vmn2r97:0.0380  
250678,Mm\_ENSMUSG00000091679|ENSMUST00000165692|Vmn2r96:0.0371654919)0.9  
918966197:0.0042607150,Mm\_ENSMUSG00000096717|ENSMUST00000170424|Vmn2r98  
:0.0315085516)0.9998500075:0.0255454724)0.9998500075:0.0120311693)0.9998500075:0.  
0243684553,(Mm\_ENSMUSG00000094892|ENSMUST00000171914|Vmn2r101:0.0640633  
095,(Mm\_ENSMUSG00000095961|ENSMUST00000171741|Vmn2r102:0.0262757184,Mm  
\_ENSMUSG00000091771|ENSMUST00000172203|Vmn2r103:0.0328066739)0.9998500075  
:0.0230124220)0.9998500075:0.0304897788)0.9998500075:0.0210395993,(Mm\_ENSMUSG  
00000091206|ENSMUST00000172359|Vmn2r91:0.0083883012,Mm\_ENSMUSG000000913  
50|ENSMUST00000169686|Vmn2r92:0.0134353262)0.9998500075:0.0808746737)0.999850  
0075:0.0146453797)0.9042231894:0.0038350878)0.6562437379:0.0042040548)0.99985000

75:0.0662029587)0.9998500075:0.1364770382)0.9998500075:0.1037710813)0.9998500075:  
0.1384833699)0.9998500075:0.1751102430)0.9998500075:0.1732720225)0.9998500075:0.3  
239001022)0.9998500075:0.4644873032,((CmV2R2:0.2038353169,Sc-  
V2R2b:0.2820508294)0.3078873586:0.0216158850,Sc-  
V2R2a:0.2771026070)0.9998500075:0.3617852298)0.9496366138:0.0614759637)0.9998500  
075:0.0776265679,((Dr\_OlfCc1:0.3866433692,(((Mm\_ENSMUSG00000091572|ENSMUST  
00000176328|Vmn2r3:0.1272151309,((Mm\_ENSMUSG00000090581|ENSMUST000001650  
12|Vmn2r6:0.0162593818,Mm\_ENSMUSG00000062200|ENSMUST00000161972|Vmn2r7:  
0.0057809000)0.9998500075:0.0187124326,Mm\_ENSMUSG00000092049|ENSMUST0000  
0175724|Vmn2r4:0.0235989956)0.9998500075:0.0510088336)0.9998500075:0.0548036738,  
(Mm\_ENSMUSG00000068999|ENSMUST00000170270|Vmn2r5:0.0551913494,Mm\_ENS  
MUSG00000043897|ENSMUST00000077958|Vmn2r2:0.0531647934)0.9998500075:0.0369  
864047)0.9998500075:0.0506237922,Mm\_ENSMUSG00000027824|ENSMUST0000002940  
6|Vmn2r1:0.0827905753)0.9998500075:0.4862202579)0.9990071005:0.0718268306,((CmV  
2R1:0.1137431228,Sc-  
V2R1\_:0.1231183600)0.2522779714:0.0137130801)0.9998500075:0.1850609630)0.9998500  
075:0.2151253813)0.9998500075:0.2153553551,(((Xt\_CaSR.1:0.1599371546,Mm\_CaSR:0.0  
654071574)0.9998500075:0.0297822082,Dr-  
CaSR.:0.2001762361)0.8799414553:0.0243287318,(CM\_CaSR:0.0485565378,Sc-  
CasR:0.0797812725)0.9998500075:0.0422223236)0.9998500075:0.4302726200)0.99985000  
75:0.1085846745,((((Dr\_TAS1R3:0.9037120853,Mm\_TAS1R3:0.8768945203)0.983503269  
9:0.1495172228,Sc-  
TAS1R3:0.9094260028)0.9998500075:0.2540464119,((CmTAS1R7:0.4155979575,Sc-  
TAS1R8:0.6328107666)0.3596376751:0.0330151931,Sc-  
TAS1R7:0.3367905874)0.9998500075:0.2520175847)0.9998500075:0.1068363327,(((CmT  
AS1R4:0.4778480893,Sc-  
TAS1R4:0.3524435244)0.9998500075:0.2988934301,(CmTAS1R6:0.5178487647,((Sc-  
TAS1R5:0.3671303081,CmTAS1R5:0.4421032884)0.8895046355:0.0973521382,Sc-  
TAS1R6:0.6871644957)0.9637263649:0.0957667682)0.9998500075:0.1660710007)0.99985  
00075:0.1065827942,((Dr\_TAS1R2b:0.2053926621,Dr\_TAS1R2a:0.1904638906)0.9998500  
075:0.8363920149,(Mm\_TAS1R1:0.6949263257,Dr\_TAS1R1:0.7017920891)0.9998500075:  
0.1450928830)0.9998500075:0.1389108146)0.9998500075:0.1799606871)0.9998500075:0.3  
199948693,((((CmV2RL3:0.4546677871,Sc-  
V2RL3:0.4770771373)0.9998500075:0.1959239194,((Sc-  
V2RL5:0.4312376052,CmV2RL5:0.2056639739)0.3452680559:0.0239389033,Sc-  
V2RL4:0.2833321218)0.9998500075:0.2055381795)0.9587952243:0.0418018561,Dr\_OlfCb  
1:1.0026177111)0.9799146033:0.0647422885,(Dr\_OlfCa1:0.7665250987,(Sc-  
V2RL1:0.1778861590,(CmV2RL2:0.1943814329,ScV2RL2:0.3702992950)0.2090347394:0.  
0103194855)0.9998500075:0.2174393864)0.9998500075:0.1430434119)0.9998500075:0.23  
04661900)0.9998500075:0.2555429448)0.9998500075:0.9606190085,(((Sc-  
grm1:0.0794032842,Cm-grm1:0.0770415724)0.9990352591:0.0328771655,Mm-  
grm1:0.1047149252)0.9998500075:0.0999523115,Sc-  
GRM2:0.2384528812)0.9998500075:0.4505751497)0.8846047977:0.0697232898,((((Cm-  
grm7:0.1781032606,Sc-GRM3:0.1630302103)0.9998500075:0.0616219098,Sc-  
GRM4:0.2256671944)0.6249916101:0.0114016340,Sc-

GRM5:0.3633222216)0.3516464196:0.0238807854,(Cm-grm4:0.0712992664,Sc-GRM6:0.0456317271)0.9998500075:0.1092819716)0.9998500075:0.5191029929)0.999850075:0.3591194458,(Mm-grm2:0.2074281081,(Cm-grm2:0.0847463008,Sc-GRM7:0.0905605385)0.9945911297:0.0525313336)0.9998500075:0.0669086079,(Sc-GRM8:0.1497284755,(Cm-grm3:0.1180066566,Sc-GRM9:0.0692079499)0.9444652587:0.0561484572)0.9998500075:0.0917078450);

## Treefile 2

### Fig 1b

(Mm\_EN09618:0.00478437,(Mm\_EN07084\_1:0.00000007,Mm\_EN07084:0.00000007)0.000000:0.00592534,(Mm\_EN09674:0.00605773,(Mm\_EN06682:0.06434978,(Mm\_EN09076:0.74299796,(Cm-V2R1\_SI:0.29321213,((Mm\_EN02782:0.08625450,((Mm\_EN09157:0.12440375,(Mm\_EN09204:0.02391636,(Mm\_EN09058:0.01626428,Mm\_EN06220:0.00560713)0.999850:0.01930514)0.999850:0.05530207)0.999850:0.05946231,(Mm\_EN04389:0.05270474,Mm\_EN06899:0.05479329)0.999850:0.03486091)0.999850:0.04978633)0.999850:0.55828649,Dr\_OlfCc1:0.36786462)0.938575:0.06534221)0.999850:0.32563531,(((Sc\_CasR:0.07329994,CM\_CaSR\_AD:0.04402687)0.999850:0.05646488,((Mm\_CaSR\_AA:0.05948710,Xt\_CaSR\_XP:0.16312503)0.999850:0.02923929,(Lc\_CASR:0.09715289,Dr-CaSR:0.22529203)0.911178:0.01164268)0.988269:0.02595962)0.999850:0.47943993,(((Sc-V2RGrm1-:0.16551978,(Mm-grm1\_mG:0.11329602,(Cm-grm1:0.07512548,Sc-V2RGrm2-:0.06244525)0.000000:0.02745281)0.999850:0.10849042)0.000000:0.57658465,((Sc-V2RGrm3-:0.09903416,(Sc-V2RGrm4-:0.08181964,Cm-grm3:0.12891184)0.000000:0.06229581)0.000000:0.08430912,(Mm-grm2\_mG:0.22372718,(Sc-V2RGrm5-:0.08112093,Cm-grm2:0.09118287)0.000000:0.05097620)0.999850:0.08221296)0.999850:0.37930673)0.000000:0.09388289,((Sc-V2RGrm6-:0.03323184,Cm-grm4:0.06635227)0.000000:0.10343683,((Sc-V2RGrm7-:0.12770619,Cm-grm7:0.19116505)0.000000:0.06523715,(Sc-V2RGrm8-:0.28561546,Sc-V2RGrm9-:0.28561546)0.000000:0.02885273)0.000000:0.04032162)0.999850:0.52614255)0.999850:1.02608300,(((Dr\_OlfCb1\_:1.11959474,((Sc-V2RL5-s:0.32306559,(Sc-V2RL4-s:0.36622217,Cm-V2RL5\_S:0.21882951)0.257471:0.01849691)0.999850:0.26056259,(Sc-V2RL3-s:0.43579259,Cm-V2RL3\_S:0.47546368)0.999850:0.19541204)0.987356:0.05167461)0.408600:0.06156723,(Dr\_OlfCa1:0.82714648,(Sc-V2RL2:0.31722869,(Sc-V2RL1-s:0.21127194,Cm-V2RL2\_S:0.18980951)0.321413:0.02157677)0.999850:0.22439464)0.999850:0.11433657)0.999850:0.23193098,(((Lc\_TAS1R4:0.46428645,(Sc-TAS1R8:0.53696932,(Sc-TAS1R7:0.45583558,Cm-TAS1R7:0.37514952)0.998013:0.12738665)0.984336:0.11033012)0.999850:0.19855073,(Sc-TAS1R3:0.90171272,((Mm\_TAS1R3:0.18124786,Hs\_TAS1R3:0.19099811)0.999850:0.757

85087,(Lc\_TAS1R3:0.62052947,(Dr\_TAS1R3:0.56287641,Lo\_TAS1R3:0.27897148)0.999850:0.40885265)0.999850:0.15972393)0.999850:0.12051508)0.999850:0.23807481)0.999850:0.11804831,(((Cm-TAS1R6:0.57314347,(Sc-TAS1R6:0.71263661,(Sc-TAS1R5:0.47952382,Cm-TAS1R5:0.47525587)0.622085:0.07136554)0.989313:0.09708767)0.999850:0.17510150,(Sc-TAS1R4:0.29298434,Cm-TAS1R4:0.42664206)0.999850:0.37289034)0.999850:0.13126078,((Lc\_TAS1R2a:0.24513604,Lc\_TAS1R2b:0.24513604)0.999850:0.55361829,((Mm\_TAS1R2:0.23184378,Hs\_TAS1R2:0.21922328)0.999850:0.98042710,((Lo\_TAS1R4:0.38401885,(Lo\_TAS1R3:0.37711159,(Lo\_TAS1R2:0.31957458,(Dr\_TAS1R2a:0.24396233,Dr\_TAS1R2b:0.16107684)0.999850:0.60293041)0.993548:0.07806272)0.999850:0.08497440)0.999850:0.48561993,((Mm\_TAS1R1:0.19776776,Hs\_TAS1R1:0.18272539)0.999850:0.57791983,(Lc\_TAS1R1:0.36633942,(Dr\_TAS1R1\_:0.46570471,Lo\_TAS1R1:0.28406114)0.999850:0.30364484)0.999850:0.13630935)0.999850:0.12307834)0.999850:0.08519210)0.000000:0.04743686)0.999850:0.06547155)0.999850:0.16841527)0.999850:0.37421805)0.999850:0.34025319)0.000000:0.09277097)0.999850:0.20248710)0.999850:0.54050683)0.999850:1.31664531)0.989641:0.02345778)0.348516:0.00108254);

**Treefile 3**

**Fig 3**

((((((((((((((((((((((MOR262-1:0.4129699946,(MOR274-1:0.5148627706,Xt1OR28190.1:0.6350844537)0.9935979591:0.1051670188)0.9998500075:0.0986295532,(MOR213-2:0.4926942488,(MOR189-1:0.4161041713,MOR175-1:0.3521335280)0.9998500075:0.1034155843)0.9998500075:0.0999132634)0.4167519192:0.0216215644,(((MOR156-1:0.5925060292,MOR145-2:0.4209850803)0.9998500075:0.1158586369,MOR224-1:0.5906533913)0.9681822304:0.0441658256,((Xt1OR27832.3:0.0338539874,Xt1OR27832.2:0.1341300799)0.9998500075:0.4334409957,Xt1OR27704.1:0.3615954229)0.9998500075:0.1813141499)0.9998500075:0.1129119623)0.9957271476:0.0531586608,(((MOR112-1:0.1545452444,MOR115-1:0.2455439933)0.9998500075:0.3314939176,MOR104-1:0.4755077712)0.9939394357:0.0815715354,(Xt1OR28273.2:0.0613835192,Xt1OR28273.1:0.0601405042)0.9998500075:0.4957754558)0.6342448328:0.0426402943)0.9959888956:0.0886643490,(((Xt1OR27472.2:0.1099387110,Xt1OR27472.1:0.0494066162)0.9998500075:0.3142211304,Xt1OR27812.1:0.4678124903)0.6425046565:0.0721639804,(((Xt1OR27315.2:0.0606334224,Xt1OR27315.1:0.0654376688)0.9998500075:0.0357985544,Xt1OR27101.2:0.0410224155)0.9272918349:0.0266553434,Xt1OR27101.1:0.0903661677)0.9998500075:0.4054546450,Xt1OR26941.2:0.4173968224)0.7361562885:0.0655038327)0.9998500075:0.2571777407)0.9998500075:0.1830942213,Dr3OR5.4:0.5601659768)0.9934800281:0.1472078294,Sc-OR2:1.0062724630)0.9919544811:0.1310948575,(((Dr3OR15.30:0.5291712007,Dr3OR6.2:0.7386548628)0.7408632502:0.1029135464,(((Dr3OR15.42:0.1588303248,((Dr3OR15.39:0.1342896953,Dr3OR15.40:0.1913459463)0.9998500075:0.0612666587,(((Dr3OR15.37:0.1309975746,Dr3OR15.41:0.1108364185)0.9937658558:0.0298201382,(Dr3OR15.38:0.12748716

76,Dr3OR15.36:0.1041221533)0.9998500075:0.0378168315)0.5395198015:0.0115311423,((  
Dr3OR15.34:0.0468078484,(Dr3OR15.35:0.0955011126,Dr3OR15.33:0.1185977357)0.2551  
729889:0.0032875646)0.9998500075:0.0763249528,(Dr3OR15.32:0.0808756343,Dr3OR15.  
31:0.0759504512)0.9998500075:0.0385499093)0.9927534911:0.0106627168)0.9998500075:  
0.0424000994)0.9998500075:0.0769273352)0.9998500075:0.2696491965,(Dr3OR10.25:0.20  
89783839,((Dr3OR10.21:0.0056156205,Dr3OR6.3:0.0000003153)0.9998500075:0.15421383  
21,(((Dr3OR10.27:0.0176874712,Dr3OR10.23:0.0458894634)0.9998500075:0.0972172952,  
Dr3OR10.18:0.1570755805)0.9782053637:0.0217092204,((Dr3OR10.22:0.0920928590,Dr3  
OR10.20:0.0429956306)0.9998500075:0.0586215073,Dr3OR10.19:0.1039683760)0.999850  
0075:0.0669173396)0.3566864416:0.0133391313)0.9792039057:0.0435525175)0.99985000  
75:0.2537413069)0.9149798465:0.0801383014,(Dr3OR10.16:0.1051711844,(Dr3OR10.17:0.  
0762819534,Dr3OR10.26:0.6165926111)0.8541357078:0.0355414249)0.9998500075:0.3535  
262130)0.9998500075:0.2849329253)0.9998500075:0.2061158334,(((Xt1OR27949.2:0.0755  
377616,Xt1OR27949.1:0.0639032062)0.9998500075:0.6235517300,((Dr3OR10.3:0.3608721  
635,(Dr3OR10.2:0.0759007683,Dr3OR10.1:0.0431206197)0.9998500075:0.3143121412)0.9  
998500075:0.1579443351,(((Dr3OR15.47:0.0500587633,Dr3OR15.46:0.0703271904)0.999  
8500075:0.0810246679,(Dr3OR15.45:0.0303615573,Dr3OR15.44:0.0331340922)0.9998500  
075:0.0701326772)0.9998500075:0.1475135368,Dr3OR15.43:0.2421314480)0.9998500075:  
0.2292460813,((Dr3OR15.52:0.2655717408,Dr3OR15.49:0.0197451435)0.9998500075:0.27  
66200464,(((Dr3OR15.53:0.0577665220,Dr3OR15.51:0.0189967398)0.9998500075:0.06168  
83282,Dr3OR15.50:0.0805931928)0.9998500075:0.3156557978,Dr3OR15.48:0.0911808385  
)0.9998500075:0.2499129973)0.9998500075:0.2286044492)0.7580571495:0.0537040781)0.  
9084936129:0.0507823383)0.9998500075:0.2174694689,(((Dr3OR10.6:0.0000002134,Dr3O  
R10.5:0.0000000001)0.9998500075:0.0642771047,Dr3OR10.4:0.0493614835)0.9998500075  
:0.0817763774,(((Dr3OR10.9:0.2292988814,Dr3OR10.11:0.0601966256)0.3921105296:0.02  
54528515,((Dr3OR10.10:0.0267257160,Dr3OR10.7:0.0735026978)0.9998500075:0.0520958  
209,(Dr3OR10.8:0.1379586129,(Dr3OR10.13:0.0508733943,Dr3OR10.12:0.0228298355)0.9  
998500075:0.0932980480)0.8287004783:0.0104176326)0.8543579988:0.0110122475)0.999  
8500075:0.0741830677,(Dr3OR10.15:0.0282702074,Dr3OR10.14:0.0331548077)0.9998500  
075:0.0473286592)0.9427526851:0.0313450543)0.9998500075:0.8395207875)0.987094692  
6:0.0860747139)0.8688842019:0.0609455865)0.9896186253:0.0942393285,(((Dr3OR113-  
1:0.0911652780,Dr3OR113-2:0.0986134068)0.9998500075:0.3353940018,(Dr3OR114-  
1:0.3170062709,Dr3OR9.1:0.5218217553)0.9998500075:0.2538577685)0.9998500075:0.179  
5419048,Dr3OR9.2:0.5030315459)0.9998500075:0.1886762829,(((MOR41-  
1:0.5620393986,MOR33-1:0.2921613086)0.9982365685:0.1157274651,(MOR20-  
1:0.5737918701,(MOR17-1:0.2558332043,((MOR2-1:0.3947256932,(MOR4-  
1:0.3062595774,MOR1-  
1:0.3677002231)0.9488660163:0.0582044313)0.9998500075:0.0771196305,MOR8-  
2:0.4091554280)0.4822705530:0.0654001595)0.9822126870:0.0771047884)0.9998500075:0  
.2366477678)0.9998500075:0.2589722950,Sc-  
OR1:0.7524386316)0.7888748983:0.0749895288)0.9998500075:0.1462202461)0.999850007  
5:0.1609920566,(((Dr3OR21.6:0.3172443413,((Dr3OR21.5:0.0643752987,((Dr3OR21.4:0.  
0515895930,Dr3OR21.2:0.2929372261)0.9998500075:0.0450403828,Dr3OR21.3:0.0837602  
212)0.8654852185:0.0316573795)0.9998500075:0.0944094135,Dr3OR21.1:0.2098603229)0.  
9998500075:0.2869419534)0.9998500075:0.4022583587,(((Dr3OR21.17:0.0808227836,((

Dr3OR21.13:0.5077785552,Dr3OR21.16:0.0109877026)0.2217120281:0.0125888270,Dr3OR21.18:0.1154495273)0.1427610710:0.0010316172)0.9998500075:0.1477541717,(Dr3OR21.9:0.1494499917,Dr3OR21.7:0.0121562061)0.9648969617:0.0530821716)0.7474958749:0.0276356652,Dr3OR21.8:0.0880576900)0.9998500075:0.2139877032,(Dr3OR21.11:0.2736739288,(((Dr3OR21.12:0.0353798662,Dr3OR21.14:0.0265810182)0.9237682375:0.0149668205,Dr3OR21.15:0.0343570833)0.9998500075:0.1572004391,Dr3OR21.10:0.2269201331)0.9479627941:0.0736439120)0.9998500075:0.1107583649)0.9998500075:0.2805153932,(Dr3OR15.2:0.1269484427,((Dr3OR15.14:0.1925988549,Dr3OR15.15:0.0810820234)0.8811550533:0.0258558159,Dr3OR15.16:0.1224434776)0.9998500075:0.0621013680)0.9998500075:0.2954506840)0.8433312686:0.0685896829)0.9998500075:0.1649774613,((Dr3OR15.17:0.1296405658,(((Dr3OR15.9:0.0276887970,(Dr3OR15.11:0.0459669721,Dr3OR15.10:0.0577268520)0.8820464740:0.0169709428)0.9998500075:0.0335800917,Dr3OR15.8:0.0598879311)0.9998500075:0.1592841067,(Dr3OR15.7:0.0563010220,((Dr3OR15.6:0.0580232606,Dr3OR15.4:0.0263115408)0.6814937791:0.0093405457,(Dr3OR15.5:0.0380803803,Dr3OR15.3:0.0338628515)0.7606298901:0.0100656823)0.9998500075:0.0352248742)0.9998500075:0.1736851937)0.9998500075:0.0811841749)0.9998500075:0.2527647807,Dr3OR15.1:0.3245858120)0.9998500075:0.2175382679)0.9876715280:0.0920114100,((Dr3OR17.3:0.0724499942,Dr3OR17.2:0.0719921826)0.9998500075:0.2521427180,Dr3OR17.1:0.4092722267)0.9998500075:0.3987683214)0.9998500075:0.2274532109,(((Dr3OR15.23:0.4648891294,(Dr3OR15.22:0.1254380556,Dr3OR15.21:0.0690819702)0.9998500075:0.1782635463)0.9998500075:0.2582326045,((Dr3OR15.29:0.0141435039,Dr3OR15.28:0.0221032513)0.9998500075:0.4211819113,(Dr3OR15.26:0.1127875550,(Dr3OR15.27:0.1157563286,(Dr3OR15.25:0.1645306655,Dr3OR15.24:0.0505657456)0.9998500075:0.0986044122)0.9989179477:0.0616994499)0.9998500075:0.3975587024)0.9351677971:0.0960794208)0.9998500075:0.1375343899,(Dr3OR5.3:0.1883711083,(Dr3OR5.2:0.0084520783,Dr3OR5.1:0.0210700815)0.9893851648:0.0658521392)0.9998500075:0.5893274946)0.9998500075:0.2000688592)0.9737050859:0.0949159440)0.9938439535:0.2260674803,Cm\_OR1:1.1997852912)0.9939457477:0.2947707128,(((DrTaar14a:0.5760937292,DrTaar15a:0.6419778453)0.9315328233:0.0803290055,(((DrTaar19l:0.1032396203,((DrTaar20w:0.0931199177,DrTaar20v:0.0735841853)0.9936059412:0.0158775125,(DrTaar20d1:0.1131018043,DrTaar20c:0.0881477287)0.5487576944:0.0115320866)0.9998500075:0.0390587733)0.9998500075:0.0801930264,DrTaar18a:0.1730371638)0.4596631448:0.0340016103,DrTaar17b:0.1629754238)0.9998500075:0.2670827776,DrTaar16a:0.4207277835)0.1353903381:0.0583654217)0.9998500075:0.2392239064,((((DrTaar12d:0.0000003660,(DrTaar12b:0.0588142184,DrTaar12a:0.0405409599)0.9998500075:0.0724603116)0.9998500075:0.0631762599,DrTaar12c:0.0192994770)0.9998500075:0.5644112841,(DrTaar11:0.4186988060,((DrTaar10b:0.0630357739,DrTaar10a:0.0469275575)0.9998500075:0.2556671837,DrTaar10:0.2905345672)0.9998500075:0.1291529084)0.9998500075:0.2215230759)0.9640550555:0.0594193097,(((DrTaar13c:0.0595080393,(DrTaar13d:0.0314036851,DrTaar13e:0.0689819621)0.7373932905:0.0068617739)0.9980945734:0.0258431760,(DrTaar13b:0.0510968402,DrTaar13a:0.0184720776)0.9998500075:0.0276759146)0.9998500075:0.3225887009,(Xt\_TAAR4-like\_LOC100487949:0.2249688184,Xt\_TAAR4-like\_LOC100497949:0.2176441155)0.9998500075:0.2676083387)0.7348084189:0.0877273392)0.9930915477:0.0656205596,(MmTaar7a:0.1554161551,MmTaar6:0.2133714187)0.9998500075:0.3794236063)0.4886207667:0.0722222465)0.9998500075:0.4960050895,NP\_000670.1:0.5534152571)0.9794003266:0.1755492101,NP\_000729.2:0.8964020250)0.9981295924:

0.2382778083,((NP\_005292.2:1.0700456624,NP\_001287.2:0.9505914967)0.5175757884:0.0537990999,(NP\_037477.1:1.2454772168,NP\_001044.1:0.6778487078)0.5178641148:0.1200944130)0.9998500075:0.2426407743)0.9998500075:0.6399132806)0.9998500075:0.3203800487,((Cm\_OR3:0.2940205640,Sc-OR3)0.9998500075:0.6848785093,(Dr3OR7.2:0.4982436187,(Cm\_OR4:0.2913659198,Sc-OR4:0.1022640690)0.9256096327:0.1167411437)0.9998500075:0.6012130865)0.9998500075:0.2996960914)0.9402699260:0.1629789509,((Cm\_OR5:1.0527238448,Sc-OR5:0.6212131646)0.9967922657:0.1903102485,((Cm\_OR6:0.4047571644,Sc-OR6:0.3084401300)0.9998500075:0.2320311029,((Cm\_OR7:0.3075566133,(Sc-OR7:0.3543279203,Sc-OR8:0.1553576762)0.9998500075:0.1159071550)0.9998500075:0.2185997254,Dr3OR2.1:0.8743628662)0.9998500075:0.1748705592)0.9998500075:0.4021412560)0.9833175086:0.1380829450)0.9998500075:0.5309228498,(Cm\_OR8:0.6961011244,((Dr3OR8.2:0.1045950095,Dr3OR8.1:0.1621142228)0.9998500075:0.4093464354,(Dr3OR7.4:0.1637322738,Dr3OR7.3:0.1220479811)0.9998500075:0.3404656499)0.9998500075:0.3883835679)0.6738897996:0.0733924155)0.9871999596:0.1119202085,((Dr3OR21.19:0.0985224731,(Dr3OR21.20:0.0702289307,((Dr3OR21.29:0.0709121676,Dr3OR21.28:0.0691615908)0.9998500075:0.0803417716,Dr3OR21.26:0.0259988440)0.9998500075:0.0475057505,((Dr3OR21.25:0.0490618998,Dr3OR21.21:0.1211110823)0.8704011110:0.0226490360,((Dr3OR21.24:0.0263454413,Dr3OR21.23:0.0306634093)0.9998500075:0.0680646995,Dr3OR21.22:0.0381937691)0.9998500075:0.0253093769)0.9998500075:0.0670401637)0.9998500075:0.0844651559)0.9859441249:0.0896186989)0.9998500075:0.5305906832,(((Dr3OR8.6:0.0509080755,Dr3OR8.5:0.0198766445)0.9998500075:0.0228724792,Dr3OR8.4:0.0457134957)0.9706125138:0.0360768800,Dr3OR8.3:0.0671029881)0.9998500075:0.3946219205)0.9998500075:0.1941550869)0.9998500075:0.2307350407,Dr3OR13.1:0.6292539587)0.9998500075:0.5094908838,Dr3OR15.18:0.0835735238)0.8849836931:0.0464191119,Dr3OR15.20:0.0398068840,Dr3OR15.19:0.0859251992);

#### Treefile 4

#### Fig 4

((((((((Mm\_htr6:0.3961430598,Dr\_htr6:0.2819644369)0.9998500075:0.7648426175,((((((((((((DrTaar20w:0.1035508473,(DrTaar20v:0.0901473141,(DrTaar20u:0.0422266347,DrTaar20t:0.0731458419)0.9974080829:0.0132852459)0.9998500075:0.0291998329)0.9783955396:0.0119869295,(DrTaar20a:0.0892915855,DrTaar20x:0.1298389200)0.9889588502:0.0172790603)0.9527573492:0.0153171784,(((DrTaar20d1:0.0502305930,DrTaar20c1:0.0323853434)0.9998500075:0.0339949468,(DrTaar20b1:0.0467683206,DrTaar20a1:0.0767183147)0.9998500075:0.0204510182)0.9998500075:0.0306408811,(DrTaar20z:0.0500286167,DrTaar20y:0.0510603260)0.9998500075:0.0598535955)0.9901367642:0.0154457556)0.4049209558:0.0037463223,(DrTaar20s:0.1427225484,((DrTaar20p:0.0455881301,DrTaar20o:0.0564830302)0.9813483506:0.0179073876,(DrTaar20q:0.0530142265,DrTaar20r:0.0526202857)0.9998500075:0.0167081812)0.9998500075:0.0283459927)0.7543593498:0.0071393735)0.9857500655:0.0342215980,(((DrTaar19v:0.0489798912,DrTaar19u:0.0617971114)0.9998500075:0.055



7077036,(DrTaar19t:0.0335554226,(DrTaar19s:0.0171649770,DrTaar19r:0.0477954296)0.99  
98500075:0.0233441995)0.9998500075:0.0454581507)0.9985261297:0.0189464909,(((DrTa  
aar19q:0.0443858276,DrTaar19p:0.0546268081)0.9998500075:0.0256719495,DrTaar19o:0.04  
53577490)0.4806136840:0.0073356365,(DrTaar19n:0.0267840410,DrTaar19m:0.031993344  
9)0.9998500075:0.0821585164)0.9998500075:0.0302445360)0.9920309837:0.0316709640)0  
.9998500075:0.3375175939,(((DrTaar16g:0.0426402830,DrTaar16f:0.0374567157)0.999850  
0075:0.1486011468,((DrTaar16e:0.0218236189,DrTaar16d:0.0706644678)0.9998500075:0.0  
605800736,DrTaar16c:0.1089846345)0.9998500075:0.0871546255)0.9998500075:0.207077  
1111,(DrTaar16b:0.1078533421,DrTaar16a:0.0895140014)0.9998500075:0.1967639228)0.99  
98500075:0.2942375096)0.9998500075:0.1424648230,(DrTaar15b:0.0188582112,DrTaar15a  
:0.0282218269)0.9998500075:0.7027367729)0.9985258712:0.1485910329,((DrTaar14i:0.06  
11983794,DrTaar14j:0.1084621206)0.9392733289:0.0261908766,DrTaar14K:0.0496002217)  
0.9998500075:0.7194386459)0.9998500075:0.3631716790,((((MmTaar7d:0.0246599021,M  
mTaar7a:0.0441652225)0.9621066720:0.0077938576,((MmTaar7f:0.0549046704,MmTaar7e  
:0.0130447763)0.9998500075:0.0192644967,MmTaar7b:0.0274438645)0.9989982440:0.010  
0095701)0.9998500075:0.1688432312,MmTaar9:0.1770729716)0.9674867839:0.050447022  
0,((MmTaar8b:0.0090075333,(MmTaar8c:0.0085446570,MmTaar8a:0.0214449972)0.998278  
1106:0.0123270953)0.9998500075:0.1040261781,MmTaar6:0.1232215637)0.9998500075:0.  
0871012232)0.9998500075:0.4011767075,MmTaar5:0.5531110544)0.9812054803:0.124401  
1951)0.9998500075:0.1636293303,(((Cm\_Taar2:0.1931457819,Sc\_Taar2:0.3131238153)0.9  
998500075:0.3166007503,Cm\_Taar3:0.4127607925)0.9629686987:0.0509413265,((MmTaar  
4:0.3013191980,(Xt\_TAAR4-like\_LOC100497949:0.3094416153,(Xt\_TAAR4-  
like\_LOC100487949:0.1737542315,XtTaar4b:0.1069173186)0.9998500075:0.0568406849,X  
tTaar4a:0.1854971640)0.9944532070:0.0766195976)0.9998500075:0.2341164140)0.999850  
0075:0.1274333895,(MmTaar3:0.2228929513,MmTaar2:0.3171290892)0.9998500075:0.269  
4662305)0.9998500075:0.0925766743)0.3722748748:0.0375397392)0.9998500075:0.12759  
08540,(((MmTaar1:0.3855844043,Xt\_TAAR1:0.2487081284)0.9998500075:0.1103117087,  
DrTaar1:0.6150738145)0.9958749133:0.0722880288,((Cm\_Taar1a:0.1847728120,Sc\_Taar1:  
0.1787657339)0.9998500075:0.1457035008,(Cm\_Taar1b:0.1901787308,Sc\_Taar1:0.224586  
2419)0.9998500075:0.0691003571)0.9951889023:0.0366552518)0.9998500075:0.07508945  
86)0.9961098710:0.1201284893,((DrTaar10b:0.0718524392,DrTaar10a:0.0482388833)0.999  
8500075:0.2503142069,DrTaar10:0.3815300770)0.9998500075:0.2458500063)0.999850007  
5:0.3052158248,((Cm\_Taar14:0.2900667510,Sc\_Taar14:0.2016940233)0.9998500075:0.275483  
1723,Sc\_Taar5:0.4231202480)0.9998500075:0.1457626763)0.9998500075:0.1945534167,(D  
r\_htr4a:0.1267552523,(Mm\_htr4:0.1295951733,Xt-  
htr4:0.0599908589)0.9937798770:0.0664998644)0.9998500075:0.4412002316)0.999850007  
5:0.2614078422,(Mm\_drd5:0.2230376737,Mm\_drd1a:0.2199208197)0.9998500075:0.61636  
69477)0.3056043928:0.0369196885)0.1694644920:0.0055567264,Mm\_adrB1\_NP\_031445\_  
2:0.7923161431)0.9866987690:0.1028792128,Dr\_htr2b:1.2441446925)0.4476936228:0.0500  
348050,(((rt\_adra2a:0.3635625882,Mm\_adra2a\_ENSMUSG00000033717:0.1431043183)0.  
9998500075:0.7417945444,((Dr\_drd4a:0.2722607700,Mm\_drd4:0.3322350254)0.999850007  
5:0.5492282317,((Mm\_drd3:0.2983640671,Dr\_drd3:0.2029702680)0.9998500075:0.1138755  
535,(Dr\_drd2:0.1576447140,Mm\_drd2:0.0793659898)0.9998500075:0.1720523756)0.99985  
00075:0.2442232046)0.9998500075:0.2260756071)0.9967909101:0.1306326471,((Mm\_adra  
1b:0.2784711174,Mm\_adra1a:0.2594350483)0.9998500075:0.6257844486,(Dr\_hrh2:0.29702

09921,Dr\_hrh2b:0.5270220355)0.9998500075:0.6139730260)0.1763302704:0.1439008931)0.9180701321:0.0692303326,((Dr\_htr7:0.1468444858,Mm\_htr7:0.0965336427)0.9998500075:0.8024555644,((Dr\_htr5ab:0.0689688899,Mm\_htr5A\_NP\_032340\_2:0.1904447212)0.9998500075:0.8589285147,((Mm\_htr1b:0.3809866471,Dr\_htr1fb:0.5957030201)0.9998500075:0.2663289042,Dr\_htr1a:0.4579559958)0.9337573608:0.0985009006)0.9974148397:0.1460500986)0.9954836603:0.1240398464)0.9393394991:0.0574899257)0.9998500075:0.3736979635, (Dr\_hrh1:0.4567442206,Mm\_hrh1:0.2875266373)0.9998500075:0.6103822802)0.9990761227:0.2068166052,((Mm\_chrm4:0.1575634045,Dr\_chrm2a:0.1827690219)0.9998500075:0.2356664452,(Dr\_chrm3b:0.1980305432,Mm\_chrm1:0.2319643179)0.9989341889:0.1304182014)0.9998500075:0.4540314145)0.9998500075:0.8118737835,Dr\_hrh3:0.2711772515,Dr\_hrh4:0.2767342569);

### Treefile 5

### Fig 5

((((((((((((Lo-ORA7:0.4145474517,Lc-V1R07:0.2738402039)0.9998500075:0.1096602289,(((Xt\_ORA12:0.4418444675,(Xt\_ORA13:0.4728255265,((Xt\_ORA6:0.2600217833,(Xt\_ORA2:0.0000002698,((Xt\_ORA4:0.0651294438,Xt\_ORA3:0.0094825441)0.9998500075:0.0183369352,Xt\_ORA5:0.0540996073)0.9998500075:0.0377806610)0.9998500075:0.1976777654)0.9998500075:0.0905659801,(Xt\_ORA11:0.6806833149,Xt\_ORA7:0.2067223095)0.8788498360:0.0411981032)0.9998500075:0.0558500666,((Xt\_ORA8:0.0528594026,Xt\_ORA9:0.0841141685)0.9985159282:0.0400412196,Xt\_ORA10:0.1245450703)0.9998500075:0.1793991575)0.9820519937:0.0819166515)0.9998500075:0.1689667657)0.9998500075:0.1634490532,((Lc-V1R10:0.1049870553,Lc-V1R09:0.1036644980)0.9998500075:0.1579454208,Lc-V1R08:0.4858728108)0.9925804027:0.0570561358)0.9927698233:0.0415017861,(Lo-ORA8b:0.0403247436,Lo-ORA8a:0.0352534173)0.9998500075:0.3548965665)0.9998500075:0.1549844918,(((Cm\_ORA1:0.3327117980,(Lc-V1R01:0.4108993083,(((Lo-ORA1:0.1511720862,(Dr-ORA1:0.1720305881,(Gm-ORA1:0.1253198545,Ga-ORA1:0.1090082153)0.9998500075:0.0830582566)0.9998500075:0.0698990439)0.999850075:0.1194038910,Lc-V1R01a:0.1741504306)0.9998500075:0.0499168450,Xt\_ORA1:0.4096198699)0.3597868135:0.0127966683)0.9386441989:0.0340238916)0.7448072471:0.0637379394,(Xt\_ORA14:0.7334832930,((Mm\_285399105001160201.1|\_V1R\_31:0.4910289449,(Mm\_285398425001160200.1|\_V1R\_A16:0.4458007906,(Mm\_87262444460\_V1R\_41:0.3495621126,Mm\_87272444451\_V1R\_42:0.3417439761)0.9998500075:0.1715466259)0.9998500075:0.3277103616)0.9998500075:0.4558892905,((((((((((((Mm\_285402392001160227.1|\_V1R\_163:0.0183033952,(Mm\_285400453001160210.1|\_V1R\_104:0.0000003139,Mm\_285402042001160224.1|\_V1R\_152:0.0030148571)0.9998500075:0.0121708814,Mm\_285402145001160225.1|\_V1R\_155:0.0030094436)0.9814706311:0.0030255014)0.9998500075:0.0143297499,((Mm\_28540151901160220.1|\_V1R\_139:0.0000004054,Mm\_285402262001160226.1|\_V1R\_157:0.0158255507)0.9998500075:0.0148612497,(Mm\_285400150001160208.1|\_V1R\_91:0.0183299792,Mm\_

285402808001160229.1|\_V1R\_124:0.0342026869)0.9998500075:0.0197534339)0.93664919  
94:0.0060113951)0.9998500075:0.0117349051,((Mm\_296841149001160623\_V1R\_Vmn1r9  
7:0.0030360752,((Mm\_285400898001160218.1|\_V1R\_111:0.0000000001,Mm\_2968410280  
01160641\_V1R\_Vmn1r138:0.0000000001)0.0000000000:0.0000002201,Mm\_296841151001  
160626.1|\_V1R\_Vmn1r156:0.0030528642)0.9998500075:0.0061373721)0.9998500075:0.02  
63658781,Mm\_296841161001160635\_V1R\_Vmn1r106:0.0280792245)0.9998500075:0.0289  
207997)0.9998500075:0.0108543948,Mm\_285397842001160196.1|\_V1R\_160:0.033899400  
0)0.9986242448:0.0142163036,((Mm\_296841131001160223\_V1R\_Vmn1r147:0.030849949  
4,(Mm\_285402909001160230.1|\_V1R\_159:0.0290472862,Mm\_285400290001160209.1|\_V1  
R\_103:0.0146942100)0.6830228511:0.0050616895)0.9957600500:0.0076008580,(Mm\_2969  
23877001160638.1|\_V1R\_Vmn1r162:0.0000000001,Mm\_296923880001160639\_V1R\_Vmn  
1r134:0.0000000001)0.9866014706:0.0042691732)0.9998500075:0.0298883013)0.99451880  
34:0.0151785074,(((Mm\_296923845001160621.1|\_V1R\_Vmn1r140:0.0000000001,Mm\_297  
139818001160620\_V1R\_Vmn1r92:0.0000000001)0.9998500075:0.0172511968,(Mm\_29684  
1154001160631.1|\_V1R\_Vmn1r146:0.0000000001,Mm\_297139831001160630\_V1R\_Vmn1  
r98:0.0000000001)0.9998500075:0.0110304171)0.9998500075:0.0101789320,(((Mm\_29684  
1043001160183\_V1R\_Vmn1r136:0.0000000001,Mm\_297206819001160228\_V1R\_Vmn1r1  
64:0.0000000001)0.9998500075:0.0141828875,Mm\_297139824001160625\_V1R\_Vmn1r96:  
0.0163857576)0.5398139372:0.0053518803,(Mm\_296923833001160618\_V1R\_Vmn1r105:0  
.0000000001,Mm\_296923839001160619.1|\_V1R\_Vmn1r153:0.0000000001)0.9998500075:0  
.0201642393)0.9998500075:0.0265401235)0.9998500075:0.0545489034)0.9998500075:0.02  
74093537,((Mm\_296841156001160632.1|\_V1R\_Vmn1r150:0.0000000001,Mm\_2968411580  
01160633\_V1R\_Vmn1r102:0.0000000001)0.9998500075:0.0092642836,(((Mm\_2968411660  
01160636.1|\_V1R\_Vmn1r161:0.0000000001,Mm\_297139837001160637\_V1R\_Vmn1r133:0  
.0000000001)0.9998500075:0.0121407147,Mm\_297139840001161045.1|\_predicted\_gene\_1  
0666:0.0000001997)0.9998500075:0.0029756793,Mm\_285400555001160213.1|\_V1R\_121:0  
.0030307381)0.9939154409:0.0057635165)0.9998500075:0.0768848835)0.9998500075:0.03  
32778104,(Mm\_289666791997429\_V1R:0.0568607682,Mm\_339715169997502\_V1R\_D19:  
0.1046303116)0.9998500075:0.0507082176)0.9998500075:0.1725277467,Mm\_2854044520  
01160314.1|\_V1R\_168:0.2522790339)0.9998500075:0.0504849041,((Mm\_28539964400116  
0206.1|\_V1R\_57:0.0486470499,(Mm\_V1R\_60:0.0339199754,(Mm\_297139661001161039.1|  
\_V1R\_Vmn1r186:0.0183270188,Mm\_297139664001161040.1|\_V1R\_Vmn1r187:0.0196689  
765)0.3595245692:0.0079358573)0.9998500075:0.0472224580)0.9998500075:0.252793387  
1,(Mm\_285397745001160194.1|\_V1R\_170:0.0214166568,Mm\_285398214001160199.1|\_V1  
R\_175:0.0171116719)0.9998500075:0.2115278565)0.8940784638:0.0389811022)0.9984715  
383:0.0964386036,Mm\_289666789997431\_V1R:0.2412696690)0.9998500075:0.865999850  
5,(Mm\_285399357001160203.1|\_V1R\_77:0.2009866297,Mm\_295424084001160307.1|\_V1  
R\_79:0.1584124463)0.9998500075:0.4603466759)0.8020030416:0.1087429116,Mm\_28539  
9795001160207.1|\_V1R\_2:0.7399340663)0.9998500075:0.1962092247)0.9998500075:0.328  
3898143)0.9998500075:0.2796537619)0.9998500075:0.1565203666,((Lc-  
V1R12:0.4267424337,((Lc-V1R14:0.1438521256,Lc-  
V1R13:0.2506220262)0.9864081365:0.0360523199,(((Lc-V1R19:0.1773617426,Lc-  
V1R18:0.0294853925)0.9998500075:0.1185346158,Lc-  
V1R17:0.0708549715)0.9998500075:0.2312842070,(Lc-V1R16:0.0402924948,Lc-  
V1R15:0.0210428351)0.9998500075:0.2530095907)0.9998500075:0.2879938062)0.9998500

075:0.0826713037)0.9998500075:0.1108001342,Lc-  
V1R11:0.5828074981)0.9998500075:0.1563112987)0.9998500075:0.0626004049)0.9998500  
075:0.0791037287)0.9998500075:0.1236422764,((Lo-ORA2:0.1722724198,(Dr-  
ORA2:0.3663984462,(Gm-ORA2:0.1501959229,Ga-  
ORA2:0.2484810685)0.7150090963:0.0508075022)0.9998500075:0.2180932617)0.9998500  
075:0.2726990332,(Lc-  
V1R02:0.2917862335,(Cm\_ORA2:0.1606307995,Sc\_ORA2:0.1132334943)0.9998500075:0.  
0868109838)0.6742620216:0.0386134194)0.9549658592:0.0866339767)0.9998500075:0.60  
09880964)0.9868161748:0.2589870999,((Lc-  
V1R04:0.3166183591,(Cm\_ORA4:0.2103040588,Sc\_ORA4:0.1831669677)0.9998500075:0.  
1673377323)0.9998500075:0.2661022837,((Lo-ORA3:0.3232873570,(Dr-  
ORA3a:0.2553146750,(Gm-ORA3:0.1812494062,Ga-  
ORA3:0.1421214455)0.9998500075:0.1036322921)0.9998500075:0.2012135798)0.9998500  
075:0.2564984475,(((Xt\_ORA15:0.5961679773,Lc-  
V1R03:0.3513214833)0.9763099003:0.0729980288,(Cm\_ORA3:0.2877343756,Sc\_ORA3:0.  
2750580753)0.9998500075:0.3419729081)0.9933237390:0.0912649471,(Lo-  
ORA4:0.1940123080,((Ga-ORA4:0.2066801071,Gm-  
Ora4:0.1366438120)0.9998500075:0.0676066282,Dr-  
ORA4:0.1558819868)0.9998500075:0.2163126210)0.9998500075:0.3465061375)0.9964078  
891:0.0855650408)0.7510394777:0.0751224356)0.9998500075:0.4873983323)0.993586812  
1:0.1902162559,(Lc-V1R05:1.4297035189,(((Lo-ORA6:0.4202212306,(Dr-  
ORA6:0.5933853793,(Gm-ORA6:0.4074599682,Ga-  
ORA6:0.4966116263)0.7379958233:0.0706135349)0.9998500075:0.2672937244)0.9998500  
075:0.2257567907,Lc-V1R06:0.6560204955)0.9998500075:0.5012997758,(Lo-  
ORA5:0.2285963266,(Dr-ORA5:0.4972472874,(Gm-ORA5:0.1395082835,Ga-  
ORA5:0.2099501437)0.9208690548:0.0528848815)0.8510848462:0.1259075334)0.9998500  
075:0.6592946596)0.9987237389:0.2520110035,((Sc\_ORA7:1.0947141280,Sc\_ORA6:0.734  
3023536)0.7922720314:0.2483857659,Sc\_ORA5:1.0778921112)0.9998500075:0.715017804  
9)0.9767009821:0.1461460238)0.9940980972:0.2030020958)0.9998500075:0.3345140226,(  
Lc-T2R01:0.5212671133,(Ga-T2R3:0.4255314511,Dr-  
T2R5:0.4025079663)0.9998500075:0.3676529574)0.9998500075:0.8896654006)0.75556275  
30:0.1304955890,(((Lc-T2R04:0.3409912565,Lc-  
T2R03:0.3856122804)0.9998500075:0.2965396378,Lc-  
T2R02:0.6590587970)0.9998500075:0.3394188915,(Dr-T2R1:0.1589301734,Dr-  
T2R2:0.0484062655)0.9998500075:1.3220992546)0.4361291859:0.0840480472,(((Mm\_T2R  
138--Intact\_1:1.0283363029,((Mm\_T2R137--Intact\_1:0.7034348100,Mm\_T2R122--  
Intact\_1:0.7397633310)0.9359439931:0.0926646445,((Mm\_T2R106--  
Intact\_1:0.2960955998,(Mm\_T2R105--Intact\_1:0.3301649620,Mm\_T2R107--  
Intact\_1:0.3158309495)0.9195883383:0.0787366655)0.9998500075:0.4093731500,Mm\_T2R  
130--  
Intact\_1:0.4694310491)0.9956801971:0.1001513028)0.9706167460:0.0629170024,(Mm\_T2  
R131--Intact\_1:0.8867135720,((Mm\_T2R115--Intact\_1:0.4828143943,(Mm\_T2R116--  
Intact\_1:0.4021798840,(((Mm\_T2R117--Intact\_1:0.2330503069,Mm\_T2R109--  
Intact\_1:0.2164276590)0.9998500075:0.2192242015,Mm\_T2R129--  
Intact\_1:0.4759328027)0.9998500075:0.1017767833,(Mm\_T2R33--

Intact\_1:0.4197065265,Mm\_T2R140--  
Intact\_1:0.2915481737)0.9998500075:0.1361384413)0.9103865550:0.0537300476,(Mm\_T2  
R123--Intact\_1:0.1479000084,Mm\_T2R110--  
Intact\_1:0.1121037102)0.9998500075:0.3935471065)0.8696133878:0.0379803190)0.980390  
5259:0.0710517801)0.9998500075:0.1653611927,((Mm\_T2R136--  
Intact\_1:0.5673822665,Mm\_T2R120--  
Intact\_1:0.3702722796)0.9998500075:0.2941441749,(Mm\_T2R121--  
Intact\_1:0.3180539536,Mm\_T2R102--  
Intact\_1:0.4374957442)0.9998500075:0.2491089404)0.7237615197:0.0464876707)0.999850  
0075:0.2157424737)0.8285929192:0.0511567244)0.9998500075:0.3089557678)0.99365237  
03:0.1258193360,(Mm\_T2R139--Intact\_1:0.4635833897,Mm\_T2R144--  
Intact\_1:0.4753436917)0.9998500075:0.5221585138)0.9403109010:0.0976313229,((Mm\_T2  
R118--Intact\_1:0.8054767552,(Mm\_T2R143--Intact\_1:0.3142906737,Mm\_T2R19--  
Intact\_1:0.2768601494)0.9998500075:0.3299892683)0.9998500075:0.2174724303,(Mm\_T2  
R135--Intact\_1:0.8100021747,Mm\_T2R126--  
Intact\_1:0.5535429957)0.9747230985:0.1368690172)0.9998500075:0.3126023573)0.999850  
0075:0.5346724288)0.9371881432:0.1120786110)0.9998500075:0.7931438805,Dr-  
T2R4:0.9437469623)0.9998500075:0.3583028151,Dr-  
T2R3:0.9102143420)0.9998500075:0.6738839082,Ga-T2R2:0.0308520524,Ga-  
T2R1:0.1016779746);
